# Supplementary material for: Study of the electronic effect and quantitative spectra predictions of o-methoxyaniline-terminated monoazonaphthols: a combined experimental and DFT study
Source: Royal Society of Chemistry journal article supplement (doi:10.1039/d3ra05518c), 2023-01-01

# Electronic effect Study and Quantitative Spectra Predictions of o-Methoxyaniline-terminated Monoazonaphthols: A Combined Experimental and DFT Study

Guoxun Zhu, Yan Lin, Wenxian Zhou, Huacan Song and Zhengquan Li,

## Contents

|                                                                     |    |
|---------------------------------------------------------------------|----|
| Experimental information and characterization data .....            | 2  |
| Experimental UV-Vis spectra of the compounds .....                  | 11 |
| Parameterization of the electronic effects .....                    | 13 |
| Details of DFT calculation .....                                    | 15 |
| Details of model constructions .....                                | 16 |
| Results of DFT functional screening for UV-Vis spectra fitting..... | 17 |
| Results of theoretical NMR calculation .....                        | 21 |
| Results of the predicted UV-Vis parameters and curves.....          | 22 |
| References.....                                                     | 23 |
| Energies of the optimized structures.....                           | 24 |
| Results of the frequency analysis .....                             | 26 |
| Coordinates of the optimized structures.....                        | 29 |
| Copies of <sup>1</sup> H and <sup>13</sup> C NMR Spectra .....      | 37 |

## Experimental information and characterization data

### Instruments and reagents

NMR spectra were recorded on Bruker 500 NMR ( $^1\text{H}$  500 MHz;  $^{13}\text{C}$  125 MHz) in DMSO- $d_6$ . Abbreviations for data quoted are s, singlet; brs, broad singlet; d, doublet; t, triplet; dd, doublet of doublets; m, multiplet. The residual solvent signals were used as references and the chemical shifts converted to the TMS scale (DMSO- $d_6$ :  $\delta\text{H}$  = 2.50 ppm,  $\delta\text{C}$  = 39.52 ppm). Mass spectra were measured on an Agilent TOF-G6230B mass spectrometer. UV-Vis spectra were collected on a Shimadzu UV-Vis spectrometer at the concentration of 25ppm using water as solvent.

All the reagents were purchased from Merger Biochemical Co. Ltd., which were applied in the synthesis procedure without further purification. Deionized water was used as solvent in the synthesis and UV-Vis spectra collecting.

### General procedure for the compound synthesis

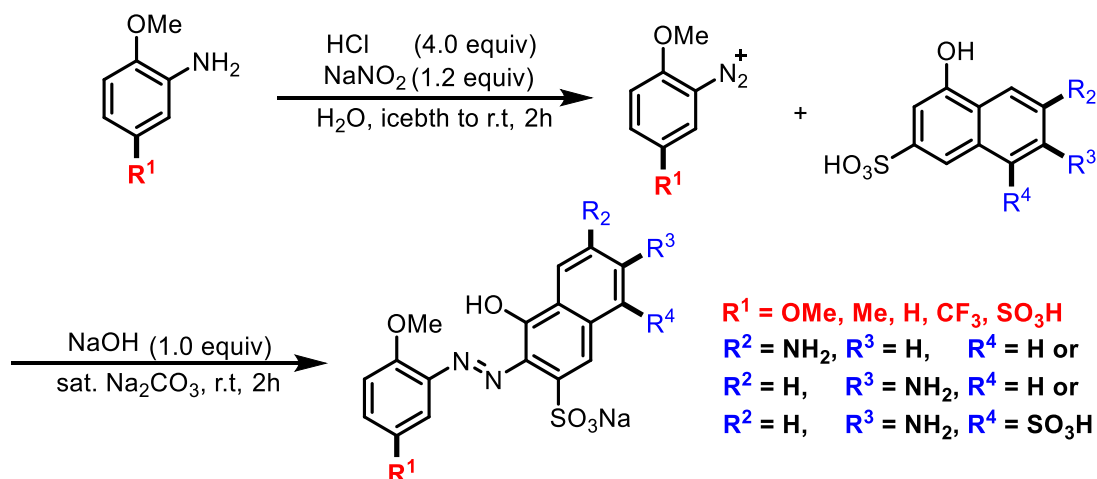

**Scheme S1.** Synthetic route of the azo compounds.

All the compounds were prepared in the same protocol taking different substrates. Taking the synthesis of **1a** for example, 1.53g of 2,5-dimethoxyaniline (10mmol) was blended with 40 mL water and 4 mL conc (40mmol, 4equiv). hydrochloric acid. The resulting solution was cooled to 0–5 °C and was added to a solution of 0.826 g sodium nitrite (12mmol, 1.2equiv) in 20 mL water over a period of 30 min. The resulting mixture was stirred at 0–5 °C for 30 min. 10 mmol of J acid and 10 mmol of sodium hydroxide was dissolved in 50mL saturated sodium carbonate solution, and the diazonium solution was then added in over a period of 10 min. After the resulting mixture was stirred for 2 h, 20g of sodium chloride was added in and stirred for 60min to salt out the coupled product. And the compound was separated out by centrifugal using a centrifuge at the rotating speed of 8000rpm.

### Characterization of the dyes

#### Sodium 7-amino-3-((2,5-dimethoxyphenyl)diazenyl)-4-hydroxynaphthalene-2-sulfonate (1a)

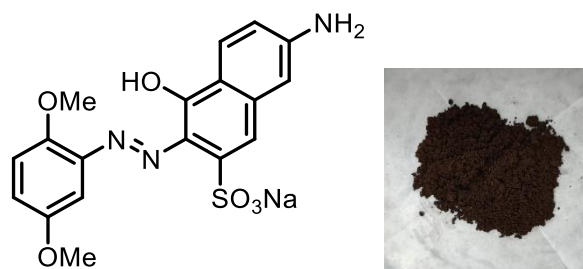

**Yield:** 92%, <sup>1</sup>H NMR (500 MHz, DMSO-d<sub>6</sub>) δ 15.8 (s, 1H), 7.9 (d, J = 8.6 Hz, 1H), 7.6 (d, J = 3.1 Hz, 1H), 7.2 (s, 1H), 7.0 (d, J = 9.0 Hz, 1H), 6.7 (ddd, J = 8.3, 5.5, 2.6 Hz, 2H), 6.6 (s, 1H), 6.4 (s, 2H), 3.9 (s, 3H), 3.7 (s, 3H). <sup>13</sup>C NMR (125 MHz, DMSO-d<sub>6</sub>) δ 177.6, 154.7, 142.5, 138.5, 132.8, 129.8, 129.7, 121.9, 120.3, 114.6, 113.0, 110.7, 109.6, 102.8, 56.9, 55.9. **MS:** Calculated for C<sub>18</sub>H<sub>16</sub>N<sub>3</sub>NaO<sub>6</sub>S: 425.39, Found 401.9 [M-Na]<sup>-</sup>.

#### Sodium 6-amino-3-((2,5-dimethoxyphenyl)diazenyl)-4-hydroxynaphthalene-2-sulfonate (1b)

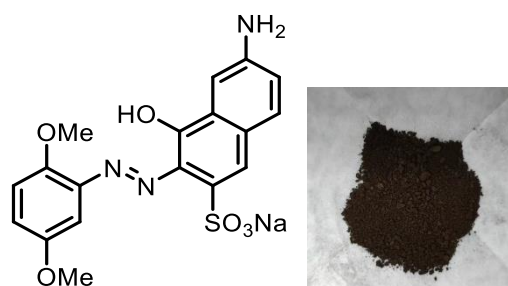

**Yield:** 95%, <sup>1</sup>H NMR (500 MHz, DMSO-d<sub>6</sub>) δ 15.9 (s, 1H), 7.6 (d, J = 3.1 Hz, 1H), 7.4 – 7.4 (m, 2H), 7.4 (s, 1H), 7.1 (d, J = 8.9 Hz, 1H), 7.0 (dd, J = 8.3, 2.5 Hz, 1H), 6.8 (dd, J = 8.9, 3.1 Hz, 1H), 5.7 (brs, 2H), 3.9 (s, 3H), 3.8 (s, 3H). <sup>13</sup>C NMR (125 MHz, DMSO-d<sub>6</sub>) δ 178.2, 154.7, 149.2, 143.0, 132.5, 132.4, 130.5, 130.1, 125.4, 122.1, 120.9, 113.1, 110.7, 109.8, 103.2, 57.0, 56.0. **MS:** Calculated for C<sub>18</sub>H<sub>16</sub>N<sub>3</sub>NaO<sub>6</sub>S: 425.39, Found 401.9 [M-Na]<sup>-</sup>.

#### Sodium 7-amino-3-((2,5-dimethoxyphenyl)diazenyl)-4-hydroxy-8-sulfonaphthalene-2-sulfonate (1c)

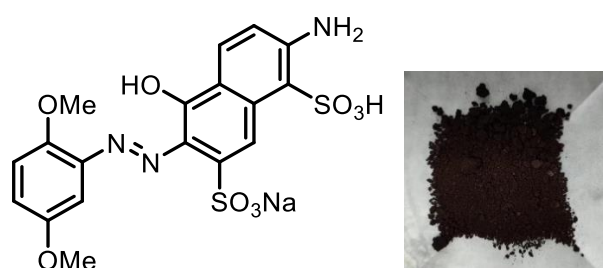

**Yield:** 80%, <sup>1</sup>H NMR (500 MHz, DMSO-d<sub>6</sub>) δ 15.9 (s, 1H), 8.7 (s, 1H), 7.9 (d, J = 8.8 Hz, 1H), 7.6 (d, J = 3.1 Hz, 1H), 7.3 (brs, 2H), 7.1 (d, J = 8.9 Hz, 1H), 6.8 – 6.5 (m, 2H), 3.9 (s, 3H), 3.8 (s, 3H). <sup>13</sup>C NMR (125 MHz, DMSO-d<sub>6</sub>) δ 176.9, 154.7, 150.8, 142.7, 142.5, 136.7, 132.9, 129.1, 128.8, 124.8, 122.0, 121.0, 117.2, 113.0, 109.8, 102.9, 56.9, 55.9. **MS:** Calculated for

$C_{18}H_{16}N_3NaO_9S_2$ : 505.45, Found 481.9 [M-Na]<sup>-</sup>.

**Sodium 7-amino-4-hydroxy-3-((2-methoxy-5-methylphenyl)diazenyl)naphthalene-2-sulfonate (2a)**

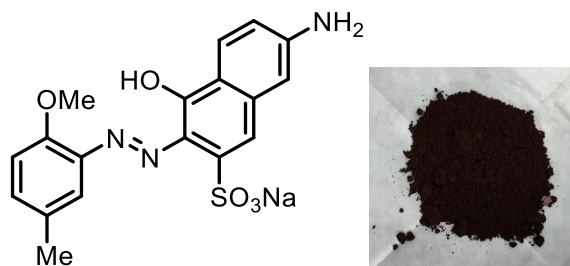

**Yield: 93%**, <sup>1</sup>H NMR (500 MHz, DMSO-d<sub>6</sub>) δ 16.1 (s, 1H), 7.9 (d, J = 8.6 Hz, 1H), 7.7 (d, J = 2.1 Hz, 1H), 7.2 (s, 1H), 7.0 (d, J = 8.3 Hz, 1H), 7.0 – 6.9 (m, 1H), 6.7 (dd, J = 8.7, 2.2 Hz, 1H), 6.6 (d, J = 2.2 Hz, 1H), 6.3 (s, 2H), 3.9 (s, 3H), 2.3 (s, 3H). <sup>13</sup>C NMR (125 MHz, DMSO-d<sub>6</sub>) δ 177.4, 154.5, 146.4, 144.1, 138.4, 131.6, 130.7, 129.7, 129.6, 126.0, 121.5, 120.4, 116.5, 114.7, 111.9, 110.6, 56.5, 21.2. **MS**: Calculated for  $C_{18}H_{16}N_3NaO_5S$ : 409.39, Found 386.9 [M-Na]<sup>-</sup>.

**Sodium 6-amino-4-hydroxy-3-((2-methoxy-5-methylphenyl)diazenyl)naphthalene-2-sulfonate (2b)**

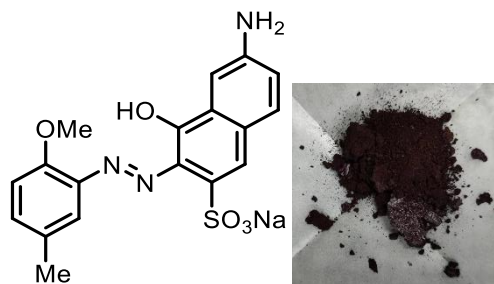

**Yield: 98%**, <sup>1</sup>H NMR (500 MHz, DMSO-d<sub>6</sub>) δ 7.8 (d, J = 2.2 Hz, 1H), 7.4 (d, J = 2.4 Hz, 1H), 7.4 (d, J = 8.4 Hz, 1H), 7.4 (s, 1H), 7.1 (d, J = 8.4 Hz, 1H), 7.0 (dd, J = 8.4, 2.1 Hz, 1H), 7.0 (dd, J = 8.3, 2.5 Hz, 1H), 5.7 (s, 2H), 4.0 (s, 3H), 2.3 (s, 3H). <sup>13</sup>C NMR (125 MHz, DMSO-d<sub>6</sub>) δ 177.6, 149.1, 146.9, 138.1, 132.5, 131.4, 130.8, 130.4, 130.1, 127.1, 125.3, 121.8, 120.9, 116.9, 112.1, 109.6, 56.7, 21.17. **MS**: Calculated for  $C_{18}H_{16}N_3NaO_5S$ : 409.39, Found 386.9 [M-Na]<sup>-</sup>.

**Sodium 7-amino-4-hydroxy-3-((2-methoxy-5-methylphenyl)diazenyl)-8-sulfonaphthalene-2-sulfonate (2c)**

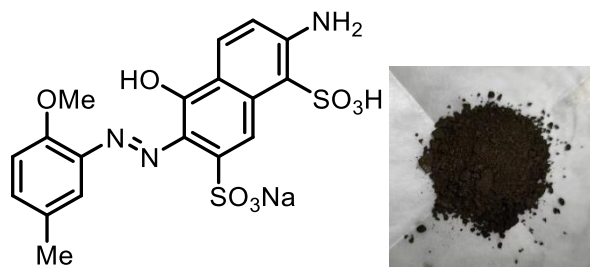

**Yield: 85%**, <sup>1</sup>H NMR (500 MHz, DMSO-d<sub>6</sub>) δ 8.7 (s, 1H), 7.9 (d, J = 8.8 Hz, 1H), 7.8 (d, J = 2.1 Hz, 1H), 7.3 (s, 1H), 7.0 (d, J = 8.3 Hz, 1H), 7.0 – 6.9 (m, 1H), 6.8 (d, J = 8.9 Hz, 1H), 3.9 (s, 1H), 2.3 (s, 1H). <sup>13</sup>C NMR (125 MHz, DMSO-d<sub>6</sub>) δ 176.5, 150.7, 146.5, 142.3, 136.5, 131.7, 130.7,

129.0, 128.7, 126.2, 124.6, 121.7, 121.1, 117.3, 116.6, 112.0, 56.6, 21.20. **MS:** Calculated for  $C_{18}H_{16}N_3NaO_8S_2$ : 489.45, Found 487.9 [M-H]<sup>-</sup>, 465.9 [M-Na]<sup>-</sup>.

**Sodium 7-amino-4-hydroxy-3-((2-methoxyphenyl)diazenyl)naphthalene-2-sulfonate (3a)**

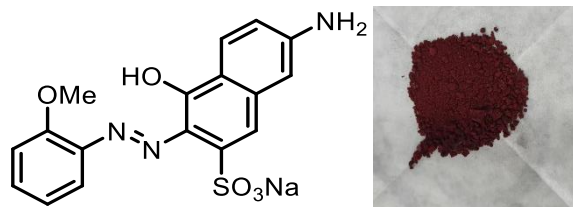

**Yield: 91%**, <sup>1</sup>H NMR (500 MHz, DMSO-d<sub>6</sub>) δ 16.0 (s, 1H), 7.9 (dd, J = 8.3, 2.9 Hz, 2H), 7.2 (s, 1H), 7.1 (d, J = 4.0 Hz, 2H), 7.0 (dd, J = 8.1, 4.1 Hz, 1H), 6.7 (dd, J = 8.7, 2.2 Hz, 1H), 6.7 (d, J = 2.2 Hz, 1H), 6.4 (s, 2H), 4.0 (s, 3H). <sup>13</sup>C NMR (125 MHz, DMSO-d<sub>6</sub>) δ 177.5, 154.7, 148.2, 144.0, 143.9, 138.4, 132.0, 129.7, 129.6, 125.5, 121.8, 121.8, 120.3, 116.2, 114.7, 112.0, 110.7, 56.5. **MS:** Calculated for  $C_{17}H_{14}N_3NaO_5S$ : 395.36, Found 371.9 [M-Na]<sup>-</sup>.

**Sodium 6-amino-4-hydroxy-3-((2-methoxyphenyl)diazenyl)naphthalene-2-sulfonate (3b)**

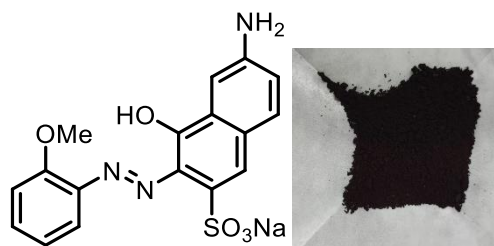

**Yield: 93%**, <sup>1</sup>H NMR (500 MHz, DMSO-d<sub>6</sub>) δ 16.2 (s, 1H), 8.0 (dd, J = 7.9, 1.5 Hz, 1H), 7.5 – 7.3 (m, 3H), 7.2 – 7.2 (m, 2H), 7.1 – 7.0 (m, 1H), 7.0 (dd, J = 8.3, 2.5 Hz, 1H), 5.7 (s, 2H), 4.0 (s, 3H). <sup>13</sup>C NMR (125 MHz, DMSO-d<sub>6</sub>) δ 177.9, 149.1, 148.7, 138.2, 138.2, 132.4, 131.8, 130.4, 130.1, 126.6, 125.4, 122.0, 121.9, 120.9, 116.7, 112.2, 109.7, 56.6. **MS:** Calculated for  $C_{17}H_{14}N_3NaO_5S$ : 395.36, Found 371.9 [M-Na]<sup>-</sup>.

**Sodium 7-amino-4-hydroxy-3-((2-methoxyphenyl)diazenyl)-8-sulfonaphthalene-2-sulfonate (3c)**

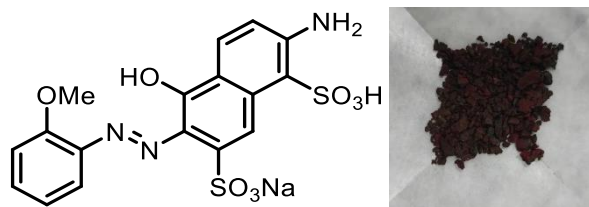

**Yield: 78%**, <sup>1</sup>H NMR (500 MHz, DMSO-d<sub>6</sub>) δ 16.2 (s, 1H), 8.7 (s, 1H), 8.0 (t, J = 9.2 Hz, 2H), 7.4 – 7.3 (brs, 2H), 7.2 (d, J = 5.8 Hz, 2H), 7.1 – 7.0 (m, 1H), 6.8 (d, J = 8.8 Hz, 1H), 4.0 (s, 3H). <sup>13</sup>C NMR (125 MHz, DMSO-d<sub>6</sub>) δ 176.7, 150.8, 148.4, 142.3, 136.6, 132.1, 129.0, 128.7, 125.8, 124.6, 121.9, 121.8, 121.1, 117.3, 116.4, 112.0, 56.5. **MS:** Calculated for  $C_{17}H_{14}N_3NaO_8S_2$ : 475.42, Found 473.8 [M-H]<sup>-</sup>, 451.9 [M-Na]<sup>-</sup>.

**Sodium 7-amino-4-hydroxy-3-((2-methoxy-5-sulfonatophenyl)diazenyl)naphthalene**

**-2-sulfonate (4a)**

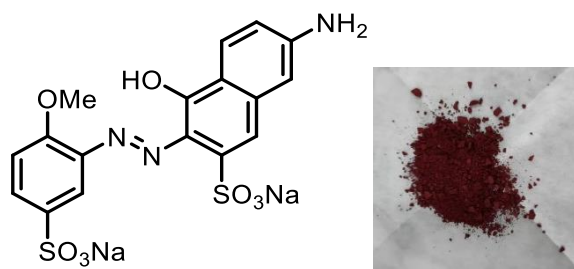

**Yield: 85%**, <sup>1</sup>H NMR (500 MHz, DMSO-d<sub>6</sub>) δ 16.1 (s, 1H), 8.2 (d, J = 2.2 Hz, 1H), 8.0 (d, J = 8.6 Hz, 1H), 7.4 (dd, J = 8.5, 2.2 Hz, 1H), 7.3 (s, 1H), 7.1 (d, J = 8.5 Hz, 1H), 6.7 (dd, J = 8.6, 2.2 Hz, 1H), 6.7 (d, J = 2.2 Hz, 1H), 6.4 (s, 2H), 4.0 (s, 3H). <sup>13</sup>C NMR (125 MHz, DMSO-d<sub>6</sub>) δ 177.5, 154.8, 148.4, 143.4, 141.8, 138.2, 131.1, 129.8, 129.8, 123.0, 122.3, 120.3, 114.7, 113.8, 111.0, 110.8, 56.8. **MS:** Calculated for C<sub>17</sub>H<sub>13</sub>N<sub>3</sub>Na<sub>2</sub>O<sub>8</sub>S<sub>2</sub>: 497.40, Found 451.9 [M-2Na+H]<sup>-</sup>.

**Sodium 6-amino-4-hydroxy-3-((2-methoxy-5-sulfonatophenyl)diazenyl)naphthalene-2-sulfonate (4b)**

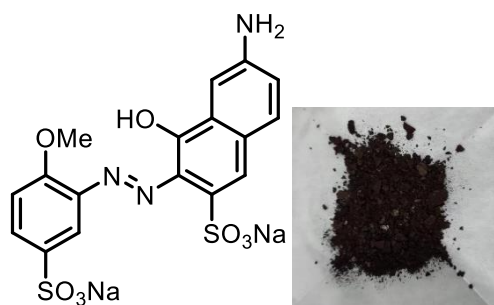

**Yield: 88%**, <sup>1</sup>H NMR (500 MHz, DMSO-d<sub>6</sub>) δ 8.2 (d, J = 2.2 Hz, 1H), 7.5 (dd, J = 8.5, 2.2 Hz, 1H), 7.43-7.4 (m, 3H), 7.1 (d, J = 8.5 Hz, 1H), 7.0 (dd, J = 8.3, 2.4 Hz, 1H), 5.8 (s, 2H), 4.0 (s, 3H). <sup>13</sup>C NMR (125 MHz, DMSO-d<sub>6</sub>) δ 177.8, 149.3, 148.9, 141.9, 137.5, 132.5, 130.9, 130.5, 130.3, 125.1, 124.0, 122.5, 121.0, 114.2, 111.2, 109.7, 56.9. **MS:** Calculated for C<sub>17</sub>H<sub>13</sub>N<sub>3</sub>Na<sub>2</sub>O<sub>8</sub>S<sub>2</sub>: 497.40, Found 451.9 [M-2Na+H]<sup>-</sup>.

**Sodium 7-amino-4-hydroxy-3-((2-methoxy-5-sulfonatophenyl)diazenyl)-8-sulfonaphthalene-2-sulfonate (4c)**

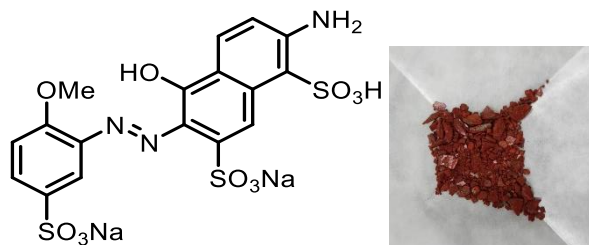

**Yield: 70%**, <sup>1</sup>H NMR (500 MHz, DMSO-d<sub>6</sub>) δ 8.8 (s, 1H), 8.2 (s, 1H), 8.0 (d, J = 8.8 Hz, 1H), 7.4 (d, J = 8.4 Hz, 1H), 7.3 (brs, 2H), 7.1 (d, J = 8.5 Hz, 1H), 6.8 (d, J = 8.9 Hz, 1H), 4.0 (s, 3H). <sup>13</sup>C NMR (125 MHz, DMSO-d<sub>6</sub>) δ 176.6, 150.9, 148.6, 141.7, 141.7, 136.4, 131.1, 129.2, 128.9, 124.5, 123.2, 122.4, 121.1, 117.5, 114.0, 111.1, 56.8. **MS:** Calculated for C<sub>17</sub>H<sub>13</sub>N<sub>3</sub>Na<sub>2</sub>O<sub>11</sub>S<sub>3</sub>: 577.46, Found 575.8 [M-H]<sup>-</sup>, 553.8 [M-Na]<sup>-</sup>.

**Sodium 7-(4-aminobenzamido)-4-hydroxy-3-((2-methoxy-5-sulfonatophenyl) diazenyl) naphthalene-2-sulfonate (4d)**

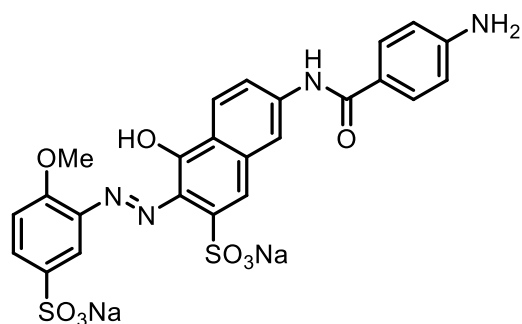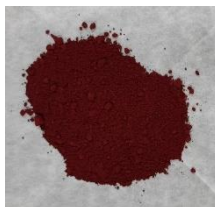

**Yield: 75%**,  $^1\text{H NMR}$  (500 MHz,  $\text{DMSO-d}_6$ )  $\delta$  10.4 (s, 1H), 8.3 (d,  $J = 8.7$  Hz, 1H), 8.2 (d,  $J = 2.1$  Hz, 1H), 8.1 (d,  $J = 2.1$  Hz, 1H), 8.0 (dd,  $J = 8.8, 2.0$  Hz, 1H), 7.9 – 7.8 (m, 2H), 7.5 (dd,  $J = 8.5, 2.2$  Hz, 1H), 7.5 (s, 1H), 7.2 (d,  $J = 8.6$  Hz, 1H), 6.9 (d,  $J = 8.1$  Hz, 2H), 4.0 (s, 3H).  $^{13}\text{C NMR}$  (125 MHz,  $\text{DMSO-d}_6$ )  $\delta$  177.0, 166.0, 149.1, 144.7, 143.8, 142.1, 136.8, 130.7, 130.1, 129.9, 128.3, 126.4, 124.5, 121.3, 119.8, 118.4, 116.1, 114.2, 111.2, 56.9, 40.5, 40.3, 40.1, 40.0, 39.8, 39.6, 39.5. **MS:** Calculated for  $\text{C}_{24}\text{H}_{18}\text{N}_4\text{Na}_2\text{O}_9\text{S}_2$ : 616.53, Found 592.9 [M-Na] $^-$ .

**Sodium 7-benzamido-4-hydroxy-3-((2-methoxy-5-sulfonatophenyl) diazenyl) naphthalene-2-sulfonate (4e)**

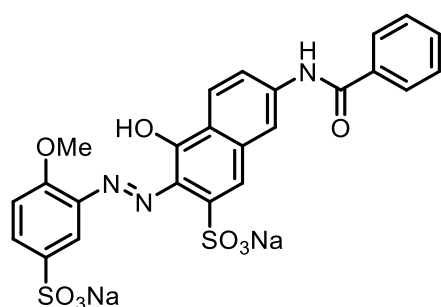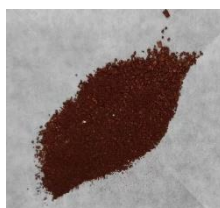

**Yield: 86%**,  $^1\text{H NMR}$  (500 MHz,  $\text{DMSO-d}_6$ )  $\delta$  10.7 (s, 1H), 8.3 (d,  $J = 8.7$  Hz, 1H), 8.2 (s, 1H), 8.2 (d,  $J = 2.0$  Hz, 1H), 8.0 – 8.0 (m, 2H), 8.0 (dd,  $J = 8.7, 2.0$  Hz, 1H), 7.6 (t,  $J = 7.3$  Hz, 1H), 7.6 (t,  $J = 7.5$  Hz, 2H), 7.5 – 7.5 (m, 2H), 7.2 (d,  $J = 8.5$  Hz, 1H), 4.0 (s, 3H).  $^{13}\text{C NMR}$  (125 MHz,  $\text{DMSO-d}_6$ )  $\delta$  176.8, 166.7, 149.2, 144.2, 144.0, 142.2, 136.8, 135.1, 132.4, 130.6, 129.9, 129.0, 128.4, 128.4, 126.8, 124.6, 121.1, 120.0, 118.7, 114.3, 111.2, 57.0, 40.5, 40.3, 40.1, 40.0, 39.8, 39.6, 40.0. **MS:** Calculated for  $\text{C}_{24}\text{H}_{17}\text{N}_3\text{NaO}_9\text{S}_2$ : 601.51, Found 577.9 [M-Na] $^-$ .

**Sodium 4-hydroxy-3-((2-methoxy-5-sulfonatophenyl) diazenyl)-7-(4-nitrobenzamido) naphthalene-2-sulfonate (4f)**

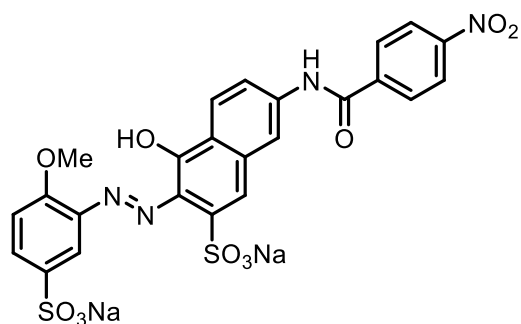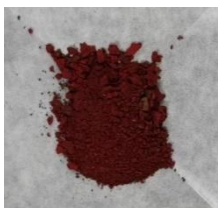

**Yield: 90%**,  $^1\text{H NMR}$  (500 MHz, DMSO- $d_6$ )  $\delta$  10.4 (s, 1H), 8.3 (d,  $J = 8.7$  Hz, 1H), 8.2 (d,  $J = 2.1$  Hz, 1H), 8.1 (d,  $J = 2.1$  Hz, 1H), 8.0 (dd,  $J = 8.8, 2.0$  Hz, 1H), 7.9 – 7.8 (m, 2H), 7.5 (dd,  $J = 8.5, 2.2$  Hz, 1H), 7.5 (s, 1H), 7.2 (d,  $J = 8.6$  Hz, 1H), 6.9 (d,  $J = 8.1$  Hz, 1H), 4.0 (s, 3H).  $^{13}\text{C NMR}$  (125 MHz, DMSO- $d_6$ )  $\delta$  177.0, 166.0, 149.1, 144.7, 143.8, 142.1, 136.8, 130.7, 130.1, 129.9, 128.3, 126.4, 124.5, 121.3, 119.8, 118.4, 116.1, 114.2, 111.2, 56.9, 40.5, 40.3, 40.14 40.0, 39.8, 39.6, 39.5. **MS**: Calculated for  $\text{C}_{24}\text{H}_{17}\text{N}_3\text{NaO}_9\text{S}_2$ : 601.51, Found 600.9 [M-H] $^-$ .

**Sodium 7-amino-4-hydroxy-3-((2-methoxy-5-(trifluoromethyl)phenyl)diazenyl)naphthalene-2-sulfonate (5a)**

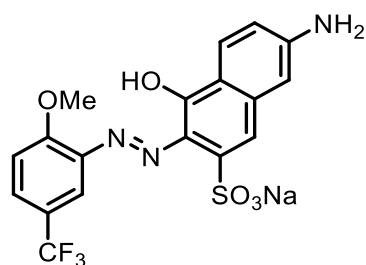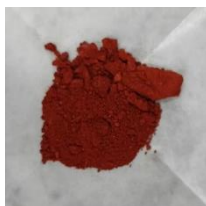

**Yield: 94%**,  $^1\text{H NMR}$  (500 MHz, DMSO- $d_6$ )  $\delta$  15.8 (s, 1H), 8.2 (d,  $J = 2.3$  Hz, 1H), 7.9 (d,  $J = 8.6$  Hz, 1H), 7.5 (dd,  $J = 8.7, 2.3$  Hz, 1H), 7.3 (d,  $J = 8.6$  Hz, 1H), 7.3 (s, 1H), 6.7 (dd,  $J = 8.6, 2.2$  Hz, 1H), 6.7 (d,  $J = 2.2$  Hz, 1H), 6.5 (s, 2H), 4.1 (s, 3H).  $^{13}\text{C NMR}$  (125 MHz, DMSO- $d_6$ )  $\delta$  178.2, 155.2, 150.4, 143.9, 138.5, 132.7, 130.5, 130.1, 122.9, 122.5, 120.0, 114.7, 112.4, 111.0, 57.1. **MS**: Calculated for  $\text{C}_{18}\text{H}_{13}\text{F}_3\text{N}_3\text{NaO}_5\text{S}$ : 463.36, Found 439.9 [M-Na] $^-$ .

**Sodium 6-amino-4-hydroxy-3-((2-methoxy-5-(trifluoromethyl)phenyl)diazenyl)naphthalene-2-sulfonate (5b)**

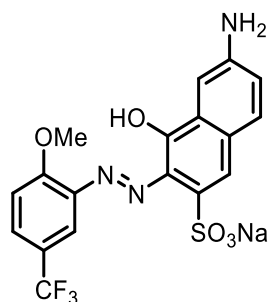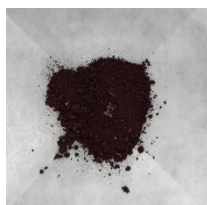

**Yield: 99%**,  $^1\text{H NMR}$  (500 MHz, DMSO- $d_6$ )  $\delta$  15.9 (s, 1H), 8.3 (d,  $J = 2.3$  Hz, 1H), 7.5 (dd,  $J = 8.6, 2.3$  Hz, 1H), 7.4 – 7.3 (m, 4H), 7.0 (dd,  $J = 8.3, 2.5$  Hz, 1H), 5.8 (s, 2H), 4.1 (s, 3H).  $^{13}\text{C NMR}$  (125 MHz, DMSO- $d_6$ )  $\delta$  179.3, 150.8, 149.34, 138.1, 132.4, 132.2, 130.8, 130.6, 125.3, 123.1, 122.6, 121.1, 113.0, 112.6, 110.1, 57.2. **MS**: Calculated for  $\text{C}_{18}\text{H}_{13}\text{F}_3\text{N}_3\text{NaO}_5\text{S}$ : 463.36, Found



439.9 [M-Na]<sup>-</sup>.

**Sodium 7-amino-4-hydroxy-3-((2-methoxy-5-(trifluoromethyl)phenyl)diazenyl)-8-sulfonaphthalene-2-sulfonate (5c)**

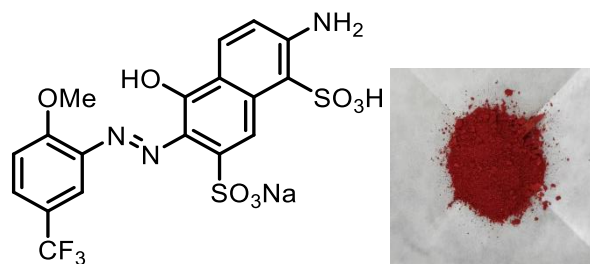

**Yield: 86%**, <sup>1</sup>H NMR (500 MHz, DMSO-d<sub>6</sub>) δ 15.9 (s, 1H), 8.8 (s, 1H), 8.2 (d, J = 2.3 Hz, 1H), 7.9 (d, J = 8.8 Hz, 1H), 7.5 (dd, J = 8.5, 2.3 Hz, 1H), 7.3 (d, J = 8.6 Hz, 1H), 6.8 (d, J = 8.8 Hz, 1H), 4.1 (s, 3H). <sup>13</sup>C NMR (125 MHz, DMSO-d<sub>6</sub>) δ 177.5, 151.3, 150.5, 142.2, 136.7, 132.7, 129.8, 129.0, 126.0, 125.0, 123.8, 123.0, 122.8, 122.5, 121.9, 120.7, 117.3, 112.6, 112.4, 57.1, 40.1. **MS:** Calculated for C<sub>18</sub>H<sub>13</sub>F<sub>3</sub>N<sub>3</sub>NaO<sub>8</sub>S<sub>2</sub>: 543.42, Found 519.8 [M-Na]<sup>-</sup>.

**Sodium 7-amino-3-((5-carboxy-2-methoxyphenyl)diazenyl)-4-hydroxynaphthalene-2-sulfonate (6a)**

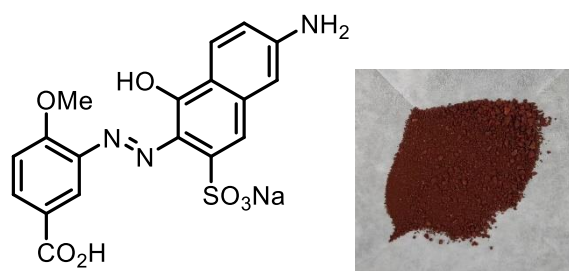

**Yield: 87%**, <sup>1</sup>H NMR (500 MHz, DMSO-d<sub>6</sub>) δ 8.5 (d, J = 2.1 Hz, 1H), 8.0 (d, J = 8.8 Hz, 1H), 7.8 (dd, J = 8.6, 2.1 Hz, 1H), 7.3 (s, 1H), 7.2 (d, J = 8.6 Hz, 1H), 6.8 (d, J = 6.9 Hz, 2H), 4.1 (s, 3H). <sup>13</sup>C NMR (125 MHz, DMSO-d<sub>6</sub>) δ 177.6, 167.4, 152.7, 151.6, 143.9, 138.2, 131.8, 130.2, 129.8, 127.3, 124.6, 122.1, 121.4, 117.1, 115.7, 112.3, 111.7, 57.0. **MS:** Calculated for C<sub>18</sub>H<sub>14</sub>N<sub>3</sub>NaO<sub>7</sub>S: 439.37, Found 415.9 [M-Na]<sup>-</sup>.

**Sodium 7-amino-3-((5-chloro-2-methoxyphenyl)diazenyl)-4-hydroxynaphthalene-2-sulfonate (7a)**

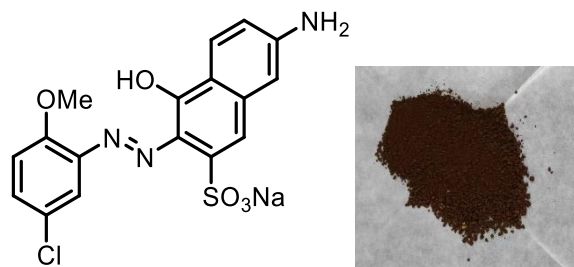

**Yield: 86%**, <sup>1</sup>H NMR (500 MHz, DMSO-d<sub>6</sub>) δ 15.8 (s, 1H), 8.0 (d, J = 8.4 Hz, 1H), 7.9 (d, J = 2.0 Hz, 1H), 7.3 (s, 1H), 7.2 (d, J = 2.4 Hz, 2H), 6.7 (s, 2H), 4.0 (s, 3H). <sup>13</sup>C NMR (125 MHz, DMSO-d<sub>6</sub>) δ 178.0, 172.5, 154.2, 146.9, 144.0, 138.4, 133.3, 130.3, 130.0, 126.1, 124.3, 122.6,

120.5, 115.3, 115.0, 113.6, 111.4, 60.2. **MS:** Calculated for **C<sub>17</sub>H<sub>13</sub>ClN<sub>3</sub>NaO<sub>5</sub>S**: 429.81, Found 405.9 [M-Na]<sup>-</sup>.

**Sodium 7-amino-3-((3-chlorophenyl)diazenyl)-4-hydroxynaphthalene-2-sulfonate (8a)**

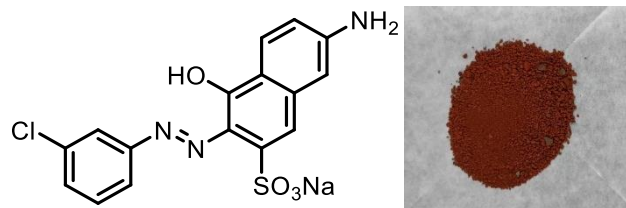

**Yield: 80%**, <sup>1</sup>H NMR (500 MHz, DMSO-d<sub>6</sub>) δ 15.7 (s, 1H), 7.9 (d, J = 7.8 Hz, 1H), 7.8 (s, 1H), 7.6 (d, J = 7.1 Hz, 1H), 7.4 (t, J = 7.6 Hz, 1H), 7.3 (s, 1H), 7.2 (d, J = 7.0 Hz, 1H), 6.8 (s, 1H), 6.7 (s, 1H). <sup>13</sup>C NMR (125 MHz, DMSO-d<sub>6</sub>) δ 177.7, 153.5, 144.9, 138.4, 134.5, 131.4, 129.9, 129.5, 124.5, 122.6, 120.8, 116.3, 115.8, 115.4, 112.1. **MS:** Calculated for **C<sub>16</sub>H<sub>11</sub>ClN<sub>3</sub>NaO<sub>4</sub>S**: 399.78, Found 375.9 [M-Na]<sup>-</sup>.

**Sodium 7-amino-4-hydroxy-3-(p-tolyldiazenyl)naphthalene-2-sulfonate (9a)**

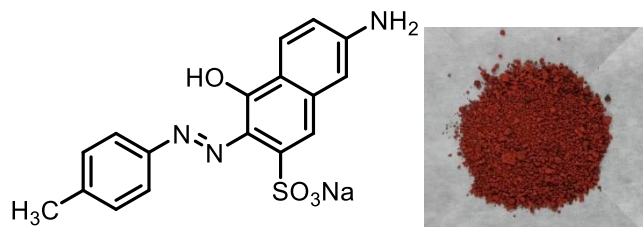

**Yield: 80%**, <sup>1</sup>H NMR (500 MHz, DMSO-d<sub>6</sub>) δ 8.0 (d, J = 8.5 Hz, 1H), 7.6 (d, J = 8.0 Hz, 2H), 7.3 (s, 1H), 7.2 (d, J = 8.0 Hz, 2H), 7.0 – 6.6 (m, 2H), 2.3 (s, 3H). <sup>13</sup>C NMR (125 MHz, DMSO-d<sub>6</sub>) δ 176.0, 144.2, 141.2, 138.1, 135.2, 130.4, 129.3, 128.5, 121.9, 120.9, 117.4, 116.2, 112.8, 21.2. **MS:** Calculated for **C<sub>17</sub>H<sub>14</sub>N<sub>3</sub>NaO<sub>4</sub>S**: 379.37, Found 355.9 [M-Na]<sup>-</sup>.

# Experimental UV-Vis spectra of the compounds

## Qualitative UV-Vis Spectra

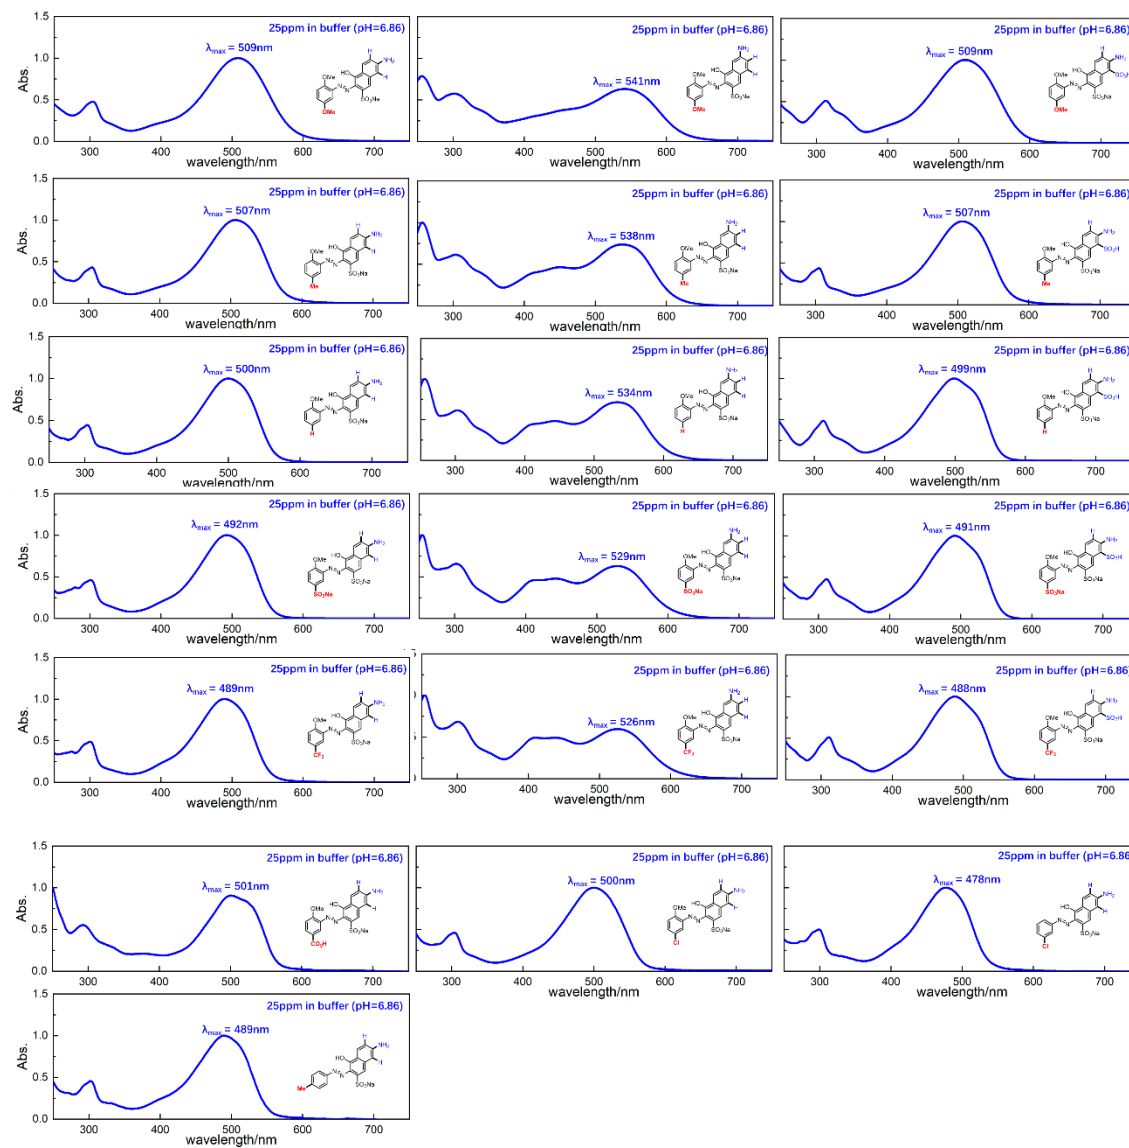

Figure S1. Normalized UV-Vis spectra of 1a-5c and 6a-9a.

## Quantitative UV-Vis Spectra

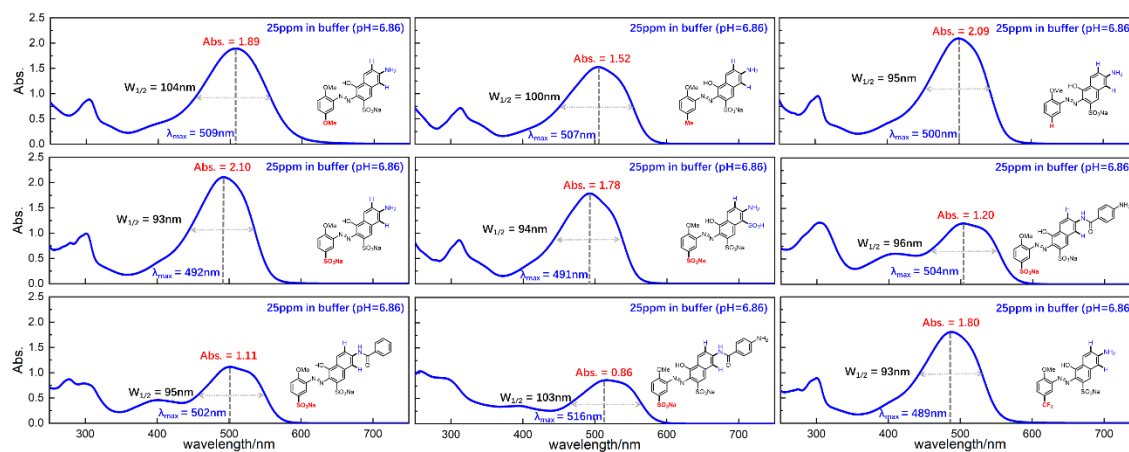

Figure S2. Quantitative UV-Vis spectra of the selected azo compounds.

## Parameterization of the electronic effects

### Determinations of the experimental chemical shifts of 1a-5a

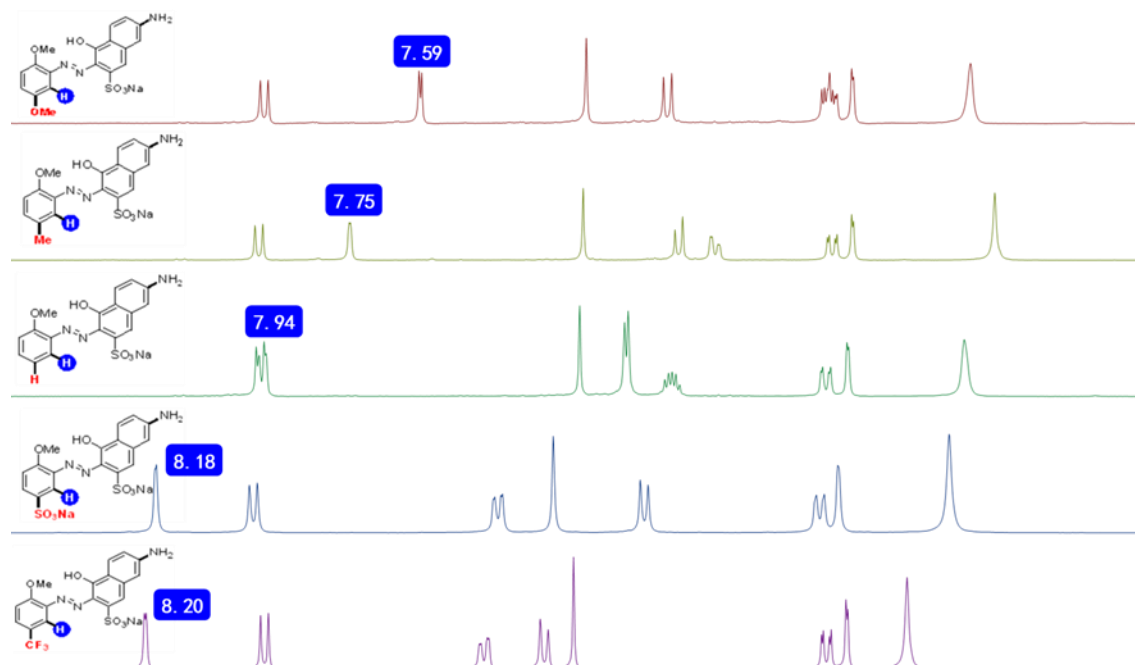

**Figure S3.** Stacked NMR spectra of **1a-5a**.

As we known, the NMR shifts had been widely applied in characterizing functional group electronegativity that EWG shifted the signals to high field while EDG shifted the signals to low field. As shown in Figure S3, chemical shifts of the hydrogen located between the azo functional groups and the substituents were the most characteristic ones in the benzene rings, which were **7.59**, **7.75**, **7.94**, **8.18** and **8.20** for **1a-5a**, respectively. As a result, those chemical shifts were applied to parameterize the electron densities of aromatic rings and to draw Figure 5 directly.

### Theoretical chemical shifts of 1a-5a

Theoretical NMR were calculated by Oliveira's method as described in the part of DFT calculation, and the calculated chemical shifts of the hydrogens were **6.56**, **6.82**, **7.01**, **7.37** and **7.99** for **1a-5a**, respectively. And the calculated chemical shifts were applied for drawing **Figure 5** in the manuscript directly.

### Hammett constants of 1a-5a

According to the paper reported by Taft, Hammett constants of methoxyl, methyl, hydrogen, sulfonic acid and trifluoromethyl were **0.12**, **-0.07**, **0**, **0.30** and **0.43**, respectively. And these values were applied for drawing Figure 5 directly.

### Fragmented charge population of 1a-5a

The compounds were divided into three pieces as shown in Scheme S2. Charge populations

of the atoms were calculated by Multiwfn using the wavefunctions of the optimized structures. Some well-defined charge population methods including Mulliken[1-3], Hirshfeld[4], Lowdin[5], atomic dipole corrected Hirshfeld atomic charge (ADCH)[6] and CM5 atomic charge[7], were applied to measure the atomic charge population. Fragmented charge populations were calculated by adding the values of atoms which constituting in the fragments. The results were summarized in Table S1, and these values were applied for drawing Figure S4 directly.

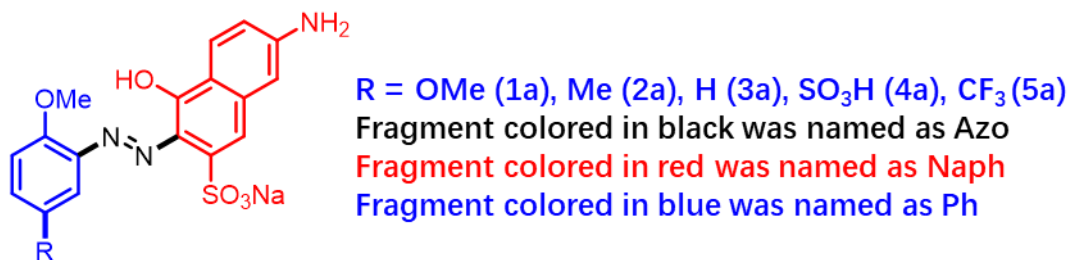

**Scheme S2.** Fragments definitions of the compounds.

**Table S1.** Fragmented charge populations of the Ph among 1a-5a

| Compound | ADCH    | CM5    | Hirshfeld | Lowdin  | Mulliken |
|----------|---------|--------|-----------|---------|----------|
| 1a       | 0.1976  | 0.2106 | 0.1727    | 0.1885  | 0.1376   |
| 2a       | 0.2148  | 0.2265 | 0.1862    | 0.1990  | 0.1497   |
| 3a       | 0.2056  | 0.2171 | 0.1729    | 0.1842  | 0.1443   |
| 4a       | 0.1927  | 0.1950 | 0.1726    | 0.2301  | 0.1468   |
| 5a       | -0.0769 | 0.0532 | -0.0694   | -0.1147 | -0.0269  |

Clearly, CM5 charge populations owned the best linearity to Hammett constants ( $R^2=0.984$ ), hence, fragmented charge populations calculated by CM5 were applied for the discussion of electronic effect parameterization.

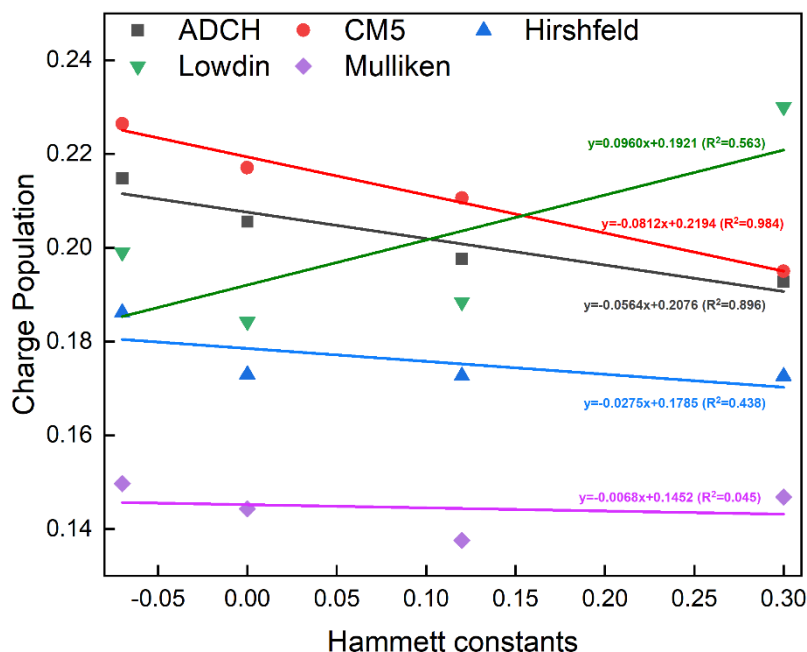

**Figure S4.** Linear fitting for the fragmented charge populations and Hammett constants.

## Details of DFT calculation

### Structure optimizations and involved software

Structures were constructed by the Open Babel Program, which were performed preoptimization tasks by using the built-in MM94 force field. DFT and TD-DFT calculations were carried out by ORCA5 computational suite, and the resolution of identity (RI) approximation and tight SCF criteria were employed in the calculation. The preoptimized structures were further optimized by the B3LYP functional, using the Ahlrichs double-zeta basis set def2-SVP (standard) and def2-SVP/J (auxiliary), combining D3 version of Grimme's dispersion. CPCM model were applied to reproduce the solvent environment. Frequency analysis was performed after optimization at the same level and no virtual frequency was found, which ensured the optimization of the structures to a minimum point.

The keywords of the mentioned optimization task were listed as follow:

```
! B3LYP D3 def2-SVP def2/J CPCM(water) RIJCOSX OPT FREQ TightSCF NoAutoStart  
MiniPrint NoPop
```

The extractions of energies, thermal correction values and coordinates were realized by Shermo program.

### Excited states calculations

The optimized structures were applied for excited states (ES) calculation at TD-TPSS/def2-SVP CPCM(water) level, with def2/J auxiliary basis set and RI approximation. And the results calculated at TD-TPSS/def2-SVP level were applied in the latter wavefunction analysis.

The keywords of the mentioned excited states calculation were listed as follow:

```
! TPSS def2-SVP def2/J CPCM(water) RIJCOSX TightSCF NoAutoStart MiniPrint NoPop  
%tddft nroots 50  
dosoc false  
tda true  
printlevel 3  
tprint 1e-8  
end
```

### Theoretical NMR calculations

The optimized structures were applied for NMR calculation at revTPSS/pcSseg-1 [8-10] CPCM(DMSO) level, and the results were applied in the parameterization of the electronic effects.

The keywords of the mentioned NMR calculation were listed as follow:

```
! pcSseg-1 CPCM(DMSO) NMR TightSCF NoAutoStart MiniPrint NoPop  
%method FUNCTIONAL revTPSS end
```

## Details of model constructions

The detailed procedure of the building of models was described as follow (3a was taken as an example):

Firstly, the chemical structures were drawn by ChemDraw and the Simplified molecular input line entry system (SMILES) string was obtained through selecting the structures and right click->Molecule->Copy As->SMILES. For example, the obtained SMILES string of **3a** was *OC1=C2C(C=C(N)C=C2)=CC(S(=O)(O[Na])=O)=C1/N=N/C3=C(OC)C=CC=C3*.

Secondly, the SMILES string was converted into 3D-structure by the Open Babel Program by typing keywords into the command line. Take 3a as example, by typing

```
obabel -:" OC1=C2C(C=C(N)C=C2)=CC(S(=O)(O[Na])=O)=C1/N=N/C3=C(OC)C=CC=C3" --gen3d --ff -O 3a.xyz
```

we obtained the 3D-coordinates of 3a pre-optimized by MMFF94 force field in a pure text file named 3a.xyz.

Thirdly, the pre-optimized structures were further optimized by the B3LYP functional, using the Ahlrichs double-zeta basis set def2-SVP (standard) and def2-SVP/J (auxiliary), combining D3 version of Grimme's dispersion. The applied keywords were summarized in the supporting information (p15), which were:

```
! B3LYP D3 def2-SVP def2/J CPCM(water) RIJCOSX OPT FREQ TightSCF NoAutoStart MiniPrint NoPop
```

Through this structure constructing procedure, all the bond lengths, bond angles, torsion angles, and dihedral angles have been fully optimized. A frequency analysis was performed for the optimized structure at the same level and no virtual frequency was found, which ensured the optimization of the structures to a minimum point.



## Results of DFT functional screening for UV-Vis spectra fitting

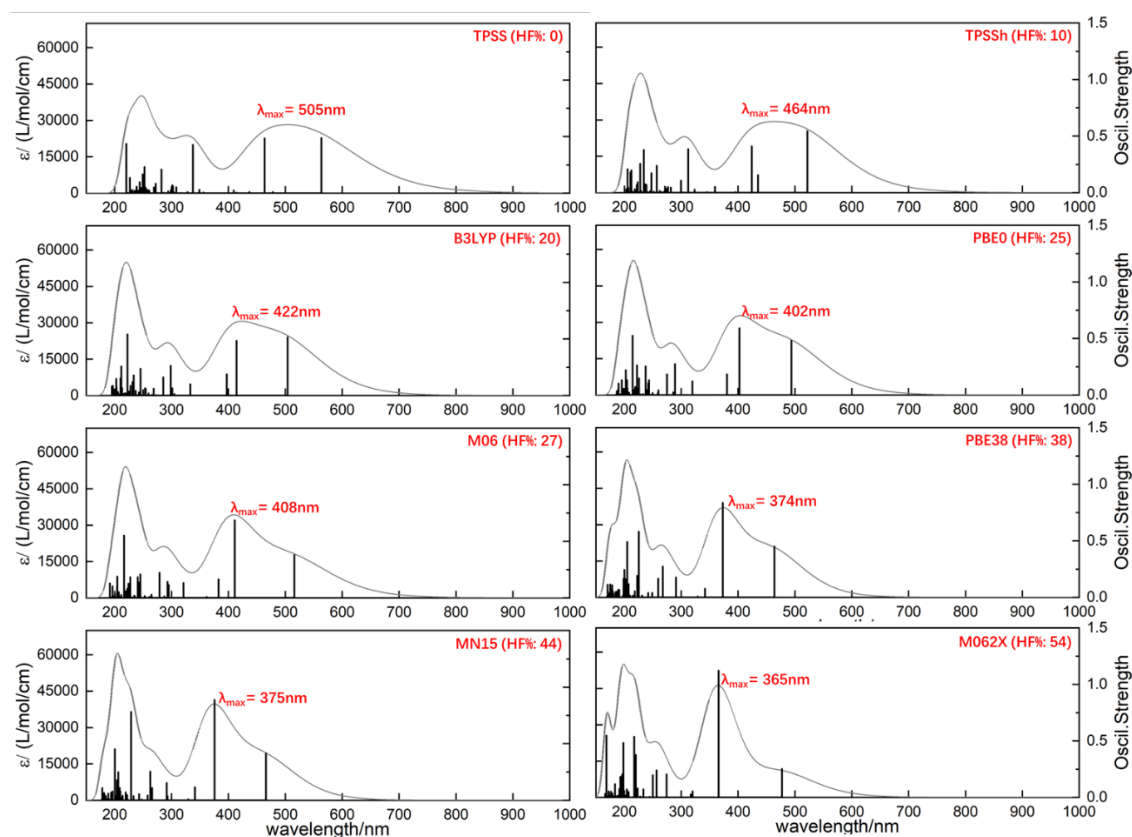

**Figure S5.** Theoretical UV-Vis spectra of **1a** generated by different DFT methods.

Varied DFT methods with different HF ratio (HF%) including TPSS(0%)[11], THSSh(10%)[12], B3LYP(20%)[13-15], PBE0(25%)[16-18], M06(27%)[19], PBE38(38%)[20], MN15(44%)[21], M06-2X(54%)[19] were screened to pick out the optimal DFT method for fitting experimental UV-Vis spectra. The calculated theoretical UV-Vis spectra were shown in Figure S1. Clearly, UV-Vis calculated by pure DFT method TPSS matched the experimental one best in both maximum absorption wavelength ( $\lambda_{\max}$ ) and peak shape. Hence, TPSS were applied in the latter UV-Vis spectra fitting. The keywords for the calculating of UV-Vis spectra were listed as follow:

And some calculated excited energies were listed as follow:

### TPSS(HF%: 0)

| Index | Excit.energy(eV) | nm        | 1000 cm <sup>-1</sup> | Oscil.str. |
|-------|------------------|-----------|-----------------------|------------|
| 1     | 2.20051          | 563.43430 | 17.74830              | 0.48721    |
| 2     | 2.59490          | 477.79912 | 20.92930              | 0.00964    |
| 3     | 2.67594          | 463.32982 | 21.58290              | 0.48393    |
| 4     | 2.83853          | 436.78999 | 22.89430              | 0.01010    |
| 5     | 2.99249          | 414.31719 | 24.13610              | 0.00439    |

|    |         |           |          |         |
|----|---------|-----------|----------|---------|
| 6  | 3.02952 | 409.25410 | 24.43470 | 0.02408 |
| 7  | 3.47932 | 356.34621 | 28.06260 | 0.00645 |
| 8  | 3.55525 | 348.73587 | 28.67500 | 0.03046 |
| 9  | 3.67133 | 337.70895 | 29.61130 | 0.42807 |
| 10 | 3.77736 | 328.22940 | 30.46650 | 0.00937 |

#### TPSSh(HF%: 10)

| Index | Excit.energy(eV) | nm        | 1000 cm <sup>-1</sup> | Oscil.str. |
|-------|------------------|-----------|-----------------------|------------|
| 1     | 2.37598          | 521.82268 | 19.16360              | 0.54524    |
| 2     | 2.85019          | 435.00394 | 22.98830              | 0.15546    |
| 3     | 2.92232          | 424.26638 | 23.57010              | 0.41065    |
| 4     | 3.13658          | 395.28508 | 25.29820              | 0.00430    |
| 5     | 3.45011          | 359.36325 | 27.82700              | 0.05290    |
| 6     | 3.59203          | 345.16446 | 28.97170              | 0.00482    |
| 7     | 3.83172          | 323.57332 | 30.90490              | 0.02805    |
| 8     | 3.96973          | 312.32435 | 32.01800              | 0.38559    |
| 9     | 4.08667          | 303.38705 | 32.96120              | 0.00312    |
| 10    | 4.13977          | 299.49538 | 33.38950              | 0.10715    |

#### B3LYP(HF%: 20)

| Index | Excit.energy(eV) | nm        | 1000 cm <sup>-1</sup> | Oscil.str. |
|-------|------------------|-----------|-----------------------|------------|
| 1     | 2.46095          | 503.80631 | 19.84890              | 0.51593    |
| 2     | 2.99242          | 414.32749 | 24.13550              | 0.48519    |
| 3     | 3.12346          | 396.94515 | 25.19240              | 0.18907    |
| 4     | 3.32558          | 372.81998 | 26.82260              | 0.00146    |
| 5     | 3.72396          | 332.93607 | 30.03580              | 0.10089    |
| 6     | 4.06757          | 304.81117 | 32.80720              | 0.01331    |
| 7     | 4.11578          | 301.24115 | 33.19600              | 0.06449    |
| 8     | 4.15201          | 298.61268 | 33.48820              | 0.26272    |
| 9     | 4.34449          | 285.38246 | 35.04070              | 0.15975    |
| 10    | 4.54118          | 273.02192 | 36.62710              | 0.00294    |

#### PBE0(HF%: 25)

| Index | Excit.energy(eV) | nm        | 1000 cm <sup>-1</sup> | Oscil.str. |
|-------|------------------|-----------|-----------------------|------------|
| 1     | 2.51087          | 493.79064 | 20.25150              | 0.48122    |
| 2     | 3.08192          | 402.29473 | 24.85740              | 0.59155    |
| 3     | 3.25931          | 380.40030 | 26.28810              | 0.18326    |
| 4     | 3.46459          | 357.86117 | 27.94380              | 0.00143    |
| 5     | 3.87702          | 319.79230 | 31.27030              | 0.12092    |
| 6     | 4.28808          | 289.13687 | 34.58570              | 0.27330    |
| 7     | 4.32236          | 286.84366 | 34.86220              | 0.01859    |
| 8     | 4.33863          | 285.76820 | 34.99340              | 0.02457    |
| 9     | 4.51087          | 274.85669 | 36.38260              | 0.18358    |
| 10    | 4.77307          | 259.75783 | 38.49740              | 0.04214    |

**M06(HF%: 27)**

| Index | Excit.energy(eV) | nm        | 1000 cm <sup>-1</sup> | Oscil.str. |
|-------|------------------|-----------|-----------------------|------------|
| 1     | 2.40244          | 516.07582 | 19.37700              | 0.37970    |
| 2     | 3.01520          | 411.19778 | 24.31920              | 0.68639    |
| 3     | 3.24167          | 382.47065 | 26.14580              | 0.16381    |
| 4     | 3.42510          | 361.98706 | 27.62530              | 0.00792    |
| 5     | 3.86100          | 321.11907 | 31.14110              | 0.13188    |
| 6     | 4.20120          | 295.11586 | 33.88500              | 0.11504    |
| 7     | 4.23103          | 293.03517 | 34.12560              | 0.14328    |
| 8     | 4.31501          | 287.33241 | 34.80290              | 0.01340    |
| 9     | 4.39698          | 281.97612 | 35.46400              | 0.00146    |
| 10    | 4.44834          | 278.72004 | 35.87830              | 0.22175    |

**PBE38(HF%: 38)**

| Index | Excit.energy(eV) | nm        | 1000 cm <sup>-1</sup> | Oscil.str. |
|-------|------------------|-----------|-----------------------|------------|
| 1     | 2.67296          | 463.84561 | 21.55890              | 0.45084    |
| 2     | 3.32348          | 373.05502 | 26.80570              | 0.83587    |
| 3     | 3.62567          | 341.96222 | 29.24300              | 0.07681    |
| 4     | 3.76835          | 329.01451 | 30.39380              | 0.00870    |
| 5     | 4.26187          | 290.91505 | 34.37430              | 0.17670    |
| 6     | 4.63612          | 267.43119 | 37.39280              | 0.27465    |
| 7     | 4.78095          | 259.32940 | 38.56100              | 0.16639    |
| 8     | 4.98028          | 248.95008 | 40.16870              | 0.03977    |
| 9     | 5.12866          | 241.74796 | 41.36540              | 0.04050    |
| 10    | 5.15859          | 240.34535 | 41.60680              | 0.00375    |

**MN15(HF%: 44)**

| Index | Excit.energy(eV) | nm        | 1000 cm <sup>-1</sup> | Oscil.str. |
|-------|------------------|-----------|-----------------------|------------|
| 1     | 2.66023          | 466.06580 | 21.45620              | 0.41335    |
| 2     | 3.30066          | 375.63486 | 26.62160              | 0.88771    |
| 3     | 3.63608          | 340.98275 | 29.32700              | 0.11669    |
| 4     | 3.76344          | 329.44374 | 30.35420              | 0.00909    |
| 5     | 4.23090          | 293.04462 | 34.12450              | 0.03610    |
| 6     | 4.25407          | 291.44835 | 34.31140              | 0.15281    |
| 7     | 4.66464          | 265.79559 | 37.62290              | 0.10928    |
| 8     | 4.72193          | 262.57128 | 38.08490              | 0.25373    |
| 9     | 4.80723          | 257.91213 | 38.77290              | 0.04324    |
| 10    | 4.97841          | 249.04370 | 40.15360              | 0.00354    |

**M062X(HF%: 54)**

| Index | Excit.energy(eV) | nm        | 1000 cm <sup>-1</sup> | Oscil.str. |
|-------|------------------|-----------|-----------------------|------------|
| 1     | 2.59818          | 477.19719 | 20.95570              | 0.25239    |
| 2     | 3.39052          | 365.67889 | 27.34640              | 1.12102    |

|    |         |           |          |         |
|----|---------|-----------|----------|---------|
| 3  | 3.87494 | 319.96420 | 31.25350 | 0.05432 |
| 4  | 3.91476 | 316.70930 | 31.57470 | 0.02811 |
| 5  | 4.51983 | 274.31158 | 36.45490 | 0.20409 |
| 6  | 4.83174 | 256.60372 | 38.97060 | 0.24062 |
| 7  | 4.96159 | 249.88820 | 40.01790 | 0.19810 |
| 8  | 5.07678 | 244.21816 | 40.94700 | 0.00526 |
| 9  | 5.31141 | 233.43000 | 42.83940 | 0.07266 |
| 10 | 5.44618 | 227.65355 | 43.92640 | 0.00833 |

## Results of theoretical NMR calculation

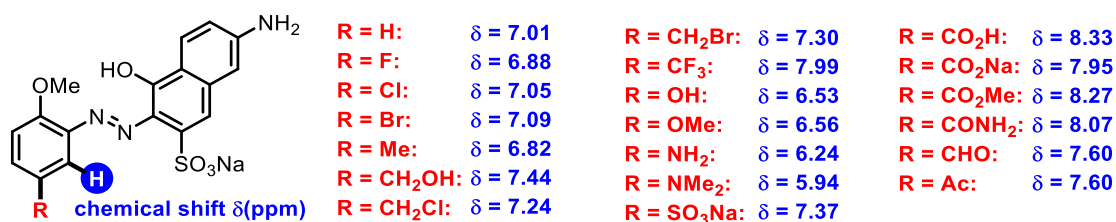

**Scheme S3.** Calculated chemical shifts of the selected *o*-methoxyanilines terminated azos.

The theoretical NMR were calculated for some substituted *o*-methoxyanilines terminated azo compounds, and the chemical shifts of the hydrogen located between the azo functional groups and the substituents were summarized in Scheme S3. Accompaniedly, some selected anilines terminated azos were also calculated and the results were summarized in Scheme S4.

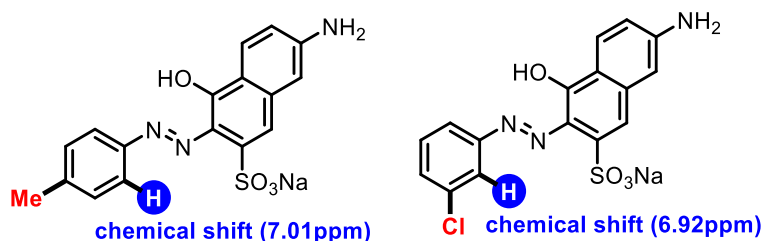

**Scheme S4.** Calculated chemical shifts of some selected anilines terminated azos.

## Results of the predicted UV-Vis parameters and curves

As mentioned in the paper,  $\lambda_{\max}$  and  $W_{1/2}$  could be calculated by the following formulars, where CCS represented for the calculated chemical shifts:

$$\lambda_{\max} = -0.0597 * \text{CCS} + 36.9589 \quad (R^2 = 0.9020); \quad W_{1/2} = -0.0938 * \text{CCS} + 16.1334 \quad (R^2 = 0.7309)$$

With the calculated chemical shifts shown in Scheme S3,  $\lambda_{\max}$  and  $W_{1/2}$  were shown in **Figure S6**.

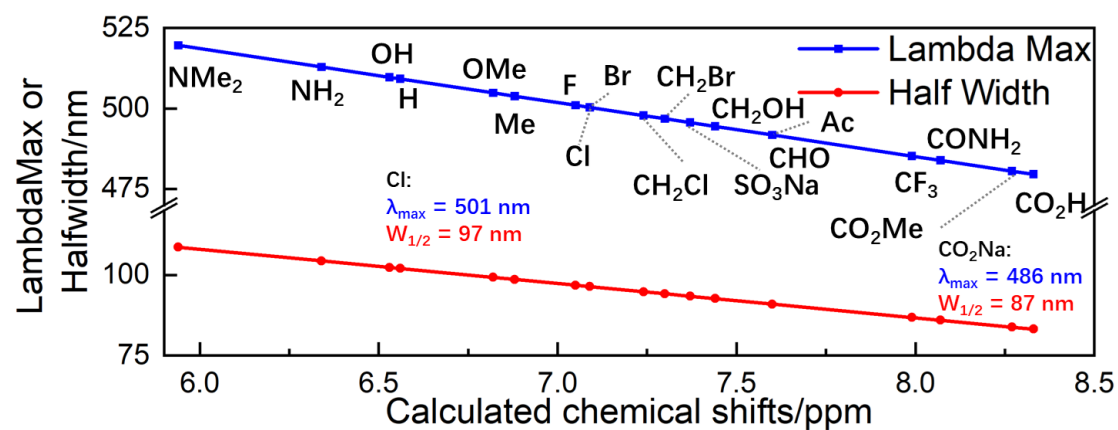

**Figure S6.** Predicted UV-Vis parameters.

With the calculated  $\lambda_{\max}$  and  $W_{1/2}$  in hand, predicted UV-Vis curve could be generated by the gaussian broadening using the following equation:

$$G(w) = \frac{1}{c\sqrt{2\pi}} e^{-\frac{(\lambda-\lambda_{\max})^2}{2c^2}}$$

Where  $\lambda$  represented for the wavelength,  $\lambda_{\max}$  represented for the calculated  $\lambda_{\max}$ . And  $c$  was connected to  $W_{1/2}$ .

## References

1. J. Chem. Phys. 1955, 23, 1833.
2. J. Chem. Phys. 1955, 23, 1841.
3. J. Chem. Phys. 1955, 23, 2343.
4. Theoret. Chim. Acta (Berl.) 1977, 44, 129-138.
5. J. Chem. Phys. 1950, 18, 365.
6. J. Theoret. Comput. Chem. 2012, 11, 163-183.
7. J. Chem. Throty Comput. 2012, 8, 527-541.
8. Phys. Rev. Lett. 2009, 103, 026403.
9. Phys. Rev. Lett. 2011, 106, 179902.
10. J. Chem. Throty Comput. 2014, 10, 1074.
11. Phys. Rev. Lett. 2003, 14, 146401.
12. J. Chem. Phys. 2003, 119, 12129.
13. J. Chem. Phys. 1993, 98, 5648.
14. Phys. Rev. B: Condens. Matter Mater. Phys. 1988, 37, 785-789.
15. Chem. Phys. Lett., 1989, 157, 200-206.
16. J. Chem. Phys. 1999, 110, 6158.
17. Phys. Rev. Lett. 1997, 78, 1396.
18. Phys. Rev. Lett. 1997, 77, 3865-3868.
19. Theor. Chem. Acc. 2006, 120, 215-241.
20. J. Chem. Phys. 2013, 138, 021104.
21. Chem. Sci. 2012, 7, 5032-5051.

## Energies of the optimized structures

### 1a

|                                                        |                    |                    |
|--------------------------------------------------------|--------------------|--------------------|
| Electronic energy:                                     | -1869.8125631 a.u. |                    |
| Sum of electronic energy and ZPE, namely U/H/G at 0 K: |                    | -1869.4855260 a.u. |
| Sum of electronic energy and thermal correction to U:  |                    | -1869.4584869 a.u. |
| Sum of electronic energy and thermal correction to H:  |                    | -1869.4575427 a.u. |
| Sum of electronic energy and thermal correction to G:  |                    | -1869.5434513 a.u. |

### 2a

|                                                        |                    |                    |
|--------------------------------------------------------|--------------------|--------------------|
| Electronic energy:                                     | -1794.6923529 a.u. |                    |
| Sum of electronic energy and ZPE, namely U/H/G at 0 K: |                    | -1794.3704017 a.u. |
| Sum of electronic energy and thermal correction to U:  |                    | -1794.3441942 a.u. |
| Sum of electronic energy and thermal correction to H:  |                    | -1794.3432501 a.u. |
| Sum of electronic energy and thermal correction to G:  |                    | -1794.4275419 a.u. |

### 3a

|                                                        |                    |                    |
|--------------------------------------------------------|--------------------|--------------------|
| Electronic energy:                                     | -1755.4269654 a.u. |                    |
| Sum of electronic energy and ZPE, namely U/H/G at 0 K: |                    | -1755.1320721 a.u. |
| Sum of electronic energy and thermal correction to U:  |                    | -1755.1077277 a.u. |
| Sum of electronic energy and thermal correction to H:  |                    | -1755.1067835 a.u. |
| Sum of electronic energy and thermal correction to G:  |                    | -1755.1866093 a.u. |

### 3b

|                                                        |                    |                    |
|--------------------------------------------------------|--------------------|--------------------|
| Electronic energy:                                     | -1755.4248225 a.u. |                    |
| Sum of electronic energy and ZPE, namely U/H/G at 0 K: |                    | -1755.1298180 a.u. |
| Sum of electronic energy and thermal correction to U:  |                    | -1755.1055736 a.u. |
| Sum of electronic energy and thermal correction to H:  |                    | -1755.1046295 a.u. |
| Sum of electronic energy and thermal correction to G:  |                    | -1755.1844041 a.u. |

### 3c

|                                                        |                    |                    |
|--------------------------------------------------------|--------------------|--------------------|
| Electronic energy:                                     | -2378.8013888 a.u. |                    |
| Sum of electronic energy and ZPE, namely U/H/G at 0 K: |                    | -2378.4919925 a.u. |
| Sum of electronic energy and thermal correction to U:  |                    | -2378.4633204 a.u. |
| Sum of electronic energy and thermal correction to H:  |                    | -2378.4623762 a.u. |
| Sum of electronic energy and thermal correction to G:  |                    | -2378.5522283 a.u. |

### 4a

|                                                        |                    |                    |
|--------------------------------------------------------|--------------------|--------------------|
| Electronic energy:                                     | -2092.1028915 a.u. |                    |
| Sum of electronic energy and ZPE, namely U/H/G at 0 K: |                    | -2091.8033957 a.u. |
| Sum of electronic energy and thermal correction to U:  |                    | -2091.7753597 a.u. |
| Sum of electronic energy and thermal correction to H:  |                    | -2091.7744155 a.u. |
| Sum of electronic energy and thermal correction to G:  |                    | -2091.8635001 a.u. |



**5a**

|                                                        |                    |                    |
|--------------------------------------------------------|--------------------|--------------------|
| Electronic energy:                                     | -2540.5462982 a.u. |                    |
| Sum of electronic energy and ZPE, namely U/H/G at 0 K: |                    | -2540.2467191 a.u. |
| Sum of electronic energy and thermal correction to U:  |                    | -2540.2168728 a.u. |
| Sum of electronic energy and thermal correction to H:  |                    | -2540.2159286 a.u. |
| Sum of electronic energy and thermal correction to G:  |                    | -2540.3070851 a.u. |

## Results of the frequency analysis

### 1a

There are 129 frequencies (cm<sup>-1</sup>):

|        |        |        |        |        |        |        |        |        |
|--------|--------|--------|--------|--------|--------|--------|--------|--------|
| 17.8   | 25.2   | 35.5   | 54.2   | 63.6   | 78.4   | 81.2   | 95.9   | 101.8  |
| 118.7  | 120.5  | 142.7  | 160.9  | 164.2  | 180.9  | 193.8  | 200.2  | 221.4  |
| 236.9  | 245.6  | 258.6  | 262.3  | 270.9  | 282.5  | 290.3  | 293.5  | 325.3  |
| 333.8  | 340.1  | 372.5  | 382.9  | 392.4  | 400.4  | 422.3  | 434.9  | 463.6  |
| 469.3  | 477.6  | 500.9  | 515.5  | 517.4  | 527.8  | 549.9  | 579.4  | 595.8  |
| 615.8  | 627.7  | 635.0  | 644.7  | 652.0  | 677.6  | 717.1  | 723.8  | 737.2  |
| 760.1  | 780.1  | 782.7  | 821.3  | 836.4  | 839.1  | 875.6  | 903.0  | 919.5  |
| 926.8  | 963.8  | 966.7  | 975.4  | 980.6  | 1001.8 | 1019.1 | 1054.4 | 1067.0 |
| 1078.7 | 1106.3 | 1149.6 | 1161.6 | 1166.8 | 1167.8 | 1179.0 | 1193.0 | 1201.1 |
| 1207.2 | 1210.9 | 1223.5 | 1235.7 | 1245.8 | 1267.5 | 1299.1 | 1305.2 | 1330.1 |
| 1357.5 | 1366.1 | 1402.9 | 1414.4 | 1438.6 | 1451.6 | 1452.8 | 1453.2 | 1459.1 |
| 1465.0 | 1466.9 | 1469.5 | 1475.5 | 1488.7 | 1515.5 | 1537.7 | 1552.0 | 1604.8 |
| 1609.8 | 1623.0 | 1651.8 | 1657.7 | 1666.4 | 3011.1 | 3012.5 | 3090.9 | 3092.3 |
| 3152.3 | 3152.6 | 3170.0 | 3180.8 | 3181.5 | 3189.7 | 3215.7 | 3217.7 | 3229.2 |
| 3580.4 | 3700.4 | 3762.5 |        |        |        |        |        |        |

### 2a

There are 126 frequencies (cm<sup>-1</sup>):

|        |        |        |        |        |        |        |        |        |
|--------|--------|--------|--------|--------|--------|--------|--------|--------|
| 19.3   | 25.7   | 38.5   | 45.4   | 62.9   | 69.0   | 83.2   | 97.5   | 102.0  |
| 121.6  | 123.5  | 141.4  | 161.7  | 169.2  | 194.7  | 200.9  | 219.4  | 241.8  |
| 243.8  | 252.4  | 260.7  | 269.7  | 281.8  | 288.5  | 304.2  | 333.1  | 337.6  |
| 353.0  | 359.3  | 381.2  | 393.1  | 416.1  | 423.4  | 464.0  | 465.3  | 471.4  |
| 485.6  | 504.6  | 517.2  | 524.9  | 528.4  | 576.8  | 587.8  | 605.8  | 613.4  |
| 625.0  | 644.0  | 650.8  | 674.4  | 713.5  | 726.6  | 738.6  | 766.0  | 780.0  |
| 782.3  | 822.7  | 836.5  | 843.5  | 875.5  | 911.4  | 926.4  | 929.7  | 969.1  |
| 975.7  | 980.5  | 986.5  | 999.1  | 1016.9 | 1027.7 | 1049.2 | 1061.3 | 1069.8 |
| 1106.3 | 1147.3 | 1161.0 | 1166.0 | 1173.0 | 1191.3 | 1201.5 | 1210.3 | 1223.2 |
| 1234.4 | 1247.4 | 1269.4 | 1291.8 | 1307.0 | 1310.1 | 1356.7 | 1365.3 | 1390.9 |
| 1402.3 | 1414.0 | 1417.8 | 1441.7 | 1450.8 | 1453.8 | 1458.4 | 1461.4 | 1469.9 |
| 1474.7 | 1488.5 | 1517.2 | 1539.7 | 1552.0 | 1604.9 | 1610.3 | 1621.2 | 1650.5 |
| 1653.0 | 1666.6 | 3015.4 | 3025.4 | 3097.1 | 3097.2 | 3124.0 | 3155.0 | 3165.6 |
| 3169.5 | 3180.4 | 3180.8 | 3189.4 | 3215.6 | 3222.1 | 3577.8 | 3696.3 | 3763.6 |

### 3a

There are 117 frequencies (cm<sup>-1</sup>):

|       |       |       |       |       |       |       |       |       |
|-------|-------|-------|-------|-------|-------|-------|-------|-------|
| 20.6  | 27.5  | 39.8  | 59.1  | 67.5  | 86.2  | 103.4 | 106.5 | 126.5 |
| 129.4 | 157.3 | 162.1 | 189.9 | 192.0 | 197.0 | 213.3 | 242.2 | 255.9 |
| 261.0 | 277.1 | 279.2 | 287.5 | 303.8 | 329.4 | 333.6 | 342.1 | 384.3 |
| 392.5 | 421.0 | 425.1 | 464.1 | 468.4 | 474.0 | 503.2 | 510.8 | 517.3 |

|        |        |        |        |        |        |        |        |        |
|--------|--------|--------|--------|--------|--------|--------|--------|--------|
| 527.5  | 550.8  | 574.6  | 577.7  | 594.0  | 609.5  | 624.7  | 641.3  | 650.6  |
| 672.9  | 715.2  | 724.2  | 765.2  | 778.1  | 780.3  | 782.2  | 816.1  | 836.3  |
| 858.4  | 875.5  | 887.7  | 926.5  | 932.5  | 974.7  | 975.9  | 979.8  | 998.6  |
| 1017.2 | 1019.4 | 1055.5 | 1066.8 | 1068.2 | 1106.6 | 1128.2 | 1160.5 | 1162.1 |
| 1165.7 | 1184.3 | 1199.1 | 1208.5 | 1214.5 | 1226.8 | 1247.4 | 1269.0 | 1279.7 |
| 1308.3 | 1311.6 | 1359.2 | 1368.6 | 1402.9 | 1414.7 | 1450.1 | 1454.3 | 1455.0 |
| 1461.6 | 1473.4 | 1478.3 | 1490.4 | 1517.2 | 1524.3 | 1552.8 | 1605.1 | 1610.3 |
| 1625.4 | 1637.5 | 1652.6 | 1666.6 | 3017.4 | 3100.1 | 3156.9 | 3169.9 | 3173.8 |
| 3180.7 | 3189.0 | 3189.8 | 3201.9 | 3215.9 | 3224.6 | 3579.8 | 3699.3 | 3763.0 |

### 3b

There are 117 frequencies (cm<sup>-1</sup>):

|        |        |        |        |        |        |        |        |        |
|--------|--------|--------|--------|--------|--------|--------|--------|--------|
| 20.2   | 27.8   | 34.8   | 51.2   | 62.1   | 86.1   | 106.4  | 118.1  | 127.2  |
| 133.3  | 148.3  | 167.7  | 190.0  | 194.9  | 216.9  | 227.6  | 239.4  | 261.0  |
| 265.2  | 269.6  | 286.3  | 303.0  | 326.3  | 335.6  | 345.6  | 378.5  | 395.6  |
| 399.9  | 405.0  | 421.8  | 429.5  | 462.7  | 474.8  | 503.7  | 508.6  | 512.3  |
| 527.1  | 549.5  | 558.6  | 569.6  | 590.9  | 595.1  | 610.0  | 642.4  | 645.6  |
| 664.3  | 720.9  | 736.2  | 767.0  | 776.7  | 779.1  | 806.9  | 828.7  | 846.8  |
| 848.1  | 856.0  | 886.8  | 927.7  | 932.9  | 947.4  | 978.8  | 999.8  | 1004.7 |
| 1019.8 | 1029.7 | 1054.8 | 1066.5 | 1098.6 | 1101.0 | 1128.9 | 1135.9 | 1163.3 |
| 1165.2 | 1174.7 | 1196.0 | 1203.8 | 1218.6 | 1228.2 | 1266.4 | 1268.9 | 1279.0 |
| 1300.0 | 1314.4 | 1348.6 | 1368.1 | 1371.8 | 1426.2 | 1453.2 | 1454.3 | 1459.8 |
| 1465.2 | 1469.4 | 1479.1 | 1480.8 | 1520.3 | 1543.3 | 1556.6 | 1603.5 | 1613.5 |
| 1625.8 | 1638.6 | 1651.2 | 1672.8 | 3020.0 | 3104.0 | 3159.2 | 3171.7 | 3175.1 |
| 3178.0 | 3190.2 | 3192.6 | 3204.6 | 3213.7 | 3227.0 | 3569.2 | 3680.8 | 3755.7 |

### 3c

There are 129 frequencies (cm<sup>-1</sup>):

|        |        |        |        |        |        |        |        |        |
|--------|--------|--------|--------|--------|--------|--------|--------|--------|
| 17.7   | 23.0   | 36.2   | 38.9   | 51.2   | 58.3   | 77.9   | 95.0   | 98.9   |
| 107.9  | 110.1  | 129.1  | 143.2  | 156.5  | 162.6  | 189.1  | 198.7  | 209.5  |
| 223.9  | 237.3  | 255.3  | 259.2  | 263.7  | 274.9  | 289.3  | 306.6  | 308.8  |
| 317.4  | 320.8  | 329.3  | 346.9  | 349.3  | 376.1  | 400.9  | 412.1  | 429.3  |
| 434.6  | 441.6  | 466.1  | 491.4  | 496.1  | 508.9  | 525.4  | 532.8  | 537.9  |
| 560.2  | 567.0  | 573.2  | 593.8  | 600.0  | 601.5  | 615.2  | 633.3  | 652.7  |
| 658.0  | 714.1  | 730.8  | 743.4  | 767.5  | 768.6  | 778.8  | 797.6  | 805.6  |
| 828.7  | 845.7  | 872.9  | 889.1  | 911.8  | 936.5  | 978.1  | 997.1  | 1003.0 |
| 1009.1 | 1019.5 | 1023.8 | 1054.6 | 1066.9 | 1106.9 | 1112.0 | 1112.6 | 1129.3 |
| 1138.8 | 1163.3 | 1165.6 | 1174.8 | 1196.6 | 1203.7 | 1219.2 | 1225.0 | 1247.8 |
| 1259.8 | 1276.6 | 1289.9 | 1295.2 | 1314.2 | 1349.0 | 1368.8 | 1397.7 | 1416.1 |
| 1439.2 | 1453.4 | 1454.9 | 1459.6 | 1464.3 | 1478.5 | 1498.8 | 1519.1 | 1525.2 |
| 1547.2 | 1592.8 | 1601.6 | 1625.6 | 1638.1 | 1651.2 | 1672.3 | 3019.1 | 3102.8 |
| 3159.1 | 3174.2 | 3183.8 | 3190.3 | 3199.1 | 3204.2 | 3226.6 | 3270.4 | 3530.9 |
| 3678.4 | 3682.6 | 3765.6 |        |        |        |        |        |        |

**4a**

There are 126 frequencies (cm<sup>-1</sup>):

|        |        |        |        |        |        |        |        |        |
|--------|--------|--------|--------|--------|--------|--------|--------|--------|
| 14.8   | 23.4   | 33.8   | 42.4   | 53.0   | 60.1   | 74.9   | 78.7   | 100.3  |
| 105.9  | 112.7  | 122.9  | 150.3  | 162.8  | 167.6  | 174.4  | 197.9  | 203.3  |
| 211.7  | 240.4  | 248.9  | 262.2  | 270.5  | 279.9  | 286.4  | 299.7  | 313.4  |
| 327.5  | 333.0  | 343.8  | 388.3  | 391.3  | 403.3  | 420.5  | 425.4  | 432.0  |
| 466.6  | 472.8  | 484.6  | 508.6  | 517.0  | 521.2  | 528.1  | 537.8  | 559.9  |
| 576.9  | 592.8  | 618.4  | 630.0  | 630.9  | 643.1  | 651.3  | 662.3  | 677.2  |
| 718.5  | 732.0  | 748.3  | 769.8  | 781.3  | 784.5  | 822.7  | 838.3  | 850.5  |
| 876.2  | 904.9  | 927.7  | 940.0  | 953.0  | 975.2  | 981.7  | 986.0  | 1002.4 |
| 1020.0 | 1052.8 | 1060.0 | 1066.4 | 1106.7 | 1115.1 | 1144.0 | 1161.8 | 1164.6 |
| 1184.5 | 1192.0 | 1199.8 | 1207.8 | 1215.2 | 1226.4 | 1248.0 | 1264.0 | 1272.6 |
| 1307.6 | 1317.5 | 1347.3 | 1361.9 | 1385.8 | 1403.7 | 1414.6 | 1437.1 | 1454.5 |
| 1456.6 | 1457.9 | 1470.0 | 1476.2 | 1488.7 | 1511.4 | 1547.9 | 1552.2 | 1604.4 |
| 1609.6 | 1629.3 | 1649.2 | 1653.1 | 1666.2 | 3023.1 | 3109.2 | 3162.3 | 3172.9 |
| 3181.2 | 3181.8 | 3191.1 | 3214.1 | 3217.3 | 3230.5 | 3581.9 | 3702.8 | 3761.1 |

**5a**

There are 129 frequencies (cm<sup>-1</sup>):

|        |        |        |        |        |        |        |        |        |
|--------|--------|--------|--------|--------|--------|--------|--------|--------|
| 20.3   | 30.6   | 49.8   | 61.8   | 70.8   | 74.8   | 84.8   | 90.5   | 99.0   |
| 104.4  | 115.2  | 125.7  | 136.6  | 142.2  | 150.6  | 153.2  | 160.0  | 164.9  |
| 190.8  | 207.2  | 217.9  | 240.8  | 249.0  | 252.1  | 266.3  | 278.3  | 282.7  |
| 285.4  | 292.1  | 308.1  | 321.2  | 342.8  | 355.2  | 379.1  | 384.9  | 390.2  |
| 406.3  | 421.4  | 424.5  | 472.9  | 476.1  | 486.9  | 498.8  | 504.0  | 516.5  |
| 519.3  | 531.6  | 535.5  | 569.3  | 583.1  | 600.2  | 615.5  | 619.9  | 626.3  |
| 645.0  | 652.0  | 665.7  | 689.2  | 720.0  | 729.1  | 762.7  | 779.6  | 786.8  |
| 819.5  | 839.7  | 845.5  | 875.4  | 899.7  | 927.9  | 928.7  | 943.6  | 973.4  |
| 977.7  | 981.7  | 983.3  | 1008.6 | 1022.3 | 1056.1 | 1067.7 | 1077.9 | 1098.4 |
| 1121.5 | 1145.1 | 1164.1 | 1164.3 | 1186.9 | 1200.7 | 1207.0 | 1215.7 | 1225.4 |
| 1242.0 | 1250.1 | 1273.6 | 1289.5 | 1311.4 | 1316.3 | 1363.9 | 1384.5 | 1404.9 |
| 1413.7 | 1423.2 | 1454.2 | 1455.7 | 1460.7 | 1468.8 | 1476.4 | 1490.2 | 1509.8 |
| 1533.8 | 1552.7 | 1604.4 | 1611.1 | 1624.7 | 1637.9 | 1652.1 | 1666.2 | 3021.3 |
| 3106.2 | 3161.5 | 3165.6 | 3182.2 | 3190.2 | 3208.2 | 3210.8 | 3221.1 | 3228.0 |
| 3585.0 | 3706.8 | 3766.0 |        |        |        |        |        |        |

## Coordinates of the optimized structures

1a

|   |              |             |             |
|---|--------------|-------------|-------------|
| C | -4.55678156  | -2.67611750 | -0.51254486 |
| C | -3.20883429  | -2.56940414 | -0.31236759 |
| C | -2.60922218  | -1.30150434 | -0.03481424 |
| C | -3.44895678  | -0.14064261 | 0.02535608  |
| C | -4.85634370  | -0.26823995 | -0.19229557 |
| C | -5.43452283  | -1.53141101 | -0.47448575 |
| H | -0.60189990  | -2.08035063 | 0.12742825  |
| H | -2.58302838  | -3.46005942 | -0.36925550 |
| C | -1.22354476  | -1.18271274 | 0.17567235  |
| C | -2.82542177  | 1.11206005  | 0.29124758  |
| C | -1.47054521  | 1.21379345  | 0.49420423  |
| C | -0.62664032  | 0.05851989  | 0.44170889  |
| H | -3.40818875  | 2.03614993  | 0.32965997  |
| H | -1.01890050  | 2.18899865  | 0.69243050  |
| N | -6.79129881  | -1.77405201 | -0.64039581 |
| N | -7.57890742  | -0.81659561 | -0.89774617 |
| C | -8.93329516  | -1.18882254 | -0.90875075 |
| C | -9.79325387  | -0.57255711 | -1.85778100 |
| C | -9.45376054  | -2.13139496 | -0.00461412 |
| C | -11.13711672 | -0.96336093 | -1.89045141 |
| C | -10.80338799 | -2.51468426 | -0.04860988 |
| H | -8.81858373  | -2.51721413 | 0.79723804  |
| C | -11.64233601 | -1.92676332 | -1.00626321 |
| H | -11.81635410 | -0.52625452 | -2.62203250 |
| H | -12.69672745 | -2.19400187 | -1.07009344 |
| O | -5.65982444  | 0.79865695  | -0.10421421 |
| H | -5.17709879  | 1.56388558  | 0.24483818  |
| O | -9.23038127  | 0.32592860  | -2.69597077 |
| O | -11.19329358 | -3.44100203 | 0.86233983  |
| C | -12.53299895 | -3.90840896 | 0.83056600  |
| H | -12.61728904 | -4.66234541 | 1.62381938  |
| H | -13.24952041 | -3.09237728 | 1.02603130  |
| H | -12.77283990 | -4.37341336 | -0.14117469 |
| C | -10.04750060 | 0.96280289  | -3.66556000 |
| H | -10.86539359 | 1.53278941  | -3.19236084 |
| H | -9.39425792  | 1.65290633  | -4.21495555 |
| H | -10.47919730 | 0.23103164  | -4.36995506 |
| N | 0.71316627   | 0.19165763  | 0.62057585  |
| H | 1.09714466   | 1.06980161  | 0.94733433  |
| H | 1.30089925   | -0.62866877 | 0.70766094  |

|    |             |             |             |
|----|-------------|-------------|-------------|
| S  | -5.19802101 | -4.33235205 | -0.86689671 |
| O  | -4.03631652 | -5.24280666 | -0.91021422 |
| O  | -6.17876580 | -4.65182061 | 0.22970518  |
| O  | -5.93374110 | -4.21909055 | -2.17777080 |
| Na | -7.91262421 | -3.98042832 | -1.09541025 |

## 2a

|   |              |             |             |
|---|--------------|-------------|-------------|
| C | -4.54824334  | -2.66826732 | -0.53872968 |
| C | -3.20168977  | -2.56036971 | -0.32825489 |
| C | -2.60864433  | -1.29403708 | -0.03171906 |
| C | -3.45207570  | -0.13622066 | 0.03432992  |
| C | -4.85758199  | -0.26541098 | -0.19708807 |
| C | -5.42876843  | -1.52674337 | -0.49548002 |
| H | -0.60014148  | -2.06886505 | 0.13908724  |
| H | -2.57292187  | -3.44852292 | -0.39151590 |
| C | -1.22463096  | -1.17344723 | 0.19209913  |
| C | -2.83459122  | 1.11492121  | 0.32040765  |
| C | -1.48161189  | 1.21775880  | 0.53646491  |
| C | -0.63403511  | 0.06583848  | 0.47744980  |
| H | -3.42077899  | 2.03658292  | 0.36474427  |
| H | -1.03446666  | 2.19176391  | 0.75032975  |
| N | -6.78545949  | -1.77375847 | -0.66392122 |
| N | -7.57457034  | -0.82078637 | -0.93122598 |
| C | -8.92825925  | -1.19716409 | -0.93318679 |
| C | -9.79316720  | -0.59745655 | -1.88501077 |
| C | -9.45006889  | -2.12664695 | -0.00931829 |
| C | -11.13893970 | -0.99571539 | -1.91187839 |
| C | -10.79358992 | -2.52204922 | -0.02920006 |
| H | -8.78562934  | -2.49394694 | 0.77908155  |
| C | -11.62095911 | -1.94585084 | -1.00759977 |
| H | -11.82016016 | -0.57373064 | -2.65048905 |
| H | -12.67480932 | -2.23294426 | -1.05740874 |
| O | -5.66562600  | 0.79868424  | -0.10472071 |
| H | -5.18990731  | 1.55869887  | 0.26460269  |
| O | -9.24044856  | 0.29039636  | -2.73556914 |
| C | -10.06131234 | 0.91289874  | -3.71377477 |
| H | -10.88064463 | 1.48469927  | -3.24630239 |
| H | -9.40993185  | 1.59865524  | -4.27046220 |
| H | -10.48865916 | 0.17026878  | -4.40872008 |
| N | 0.70594726   | 0.20172909  | 0.66518980  |
| H | 1.07706091   | 1.07048575  | 1.03045441  |
| H | 1.28815093   | -0.62088827 | 0.76915903  |
| S | -5.18477548  | -4.31992127 | -0.91987677 |
| O | -4.02103756  | -5.22722431 | -0.97190919 |

|    |              |             |             |
|----|--------------|-------------|-------------|
| O  | -6.17071644  | -4.65955371 | 0.16588975  |
| O  | -5.91479859  | -4.18662500 | -2.23199348 |
| Na | -7.90103092  | -3.96784217 | -1.14913991 |
| C  | -11.33994646 | -3.49479303 | 0.98566727  |
| H  | -11.96044745 | -2.97706266 | 1.73699488  |
| H  | -11.97902222 | -4.25252366 | 0.50518946  |
| H  | -10.53091213 | -4.01428553 | 1.52087440  |

### 3a

|   |              |             |             |
|---|--------------|-------------|-------------|
| C | -4.55013889  | -2.66231919 | -0.56434137 |
| C | -3.20258404  | -2.55953983 | -0.35934934 |
| C | -2.60600356  | -1.29869291 | -0.04678417 |
| C | -3.44668469  | -0.13999413 | 0.03738055  |
| C | -4.85313780  | -0.26311004 | -0.19069320 |
| C | -5.42823130  | -1.51997600 | -0.50059713 |
| H | -0.59938118  | -2.08095328 | 0.10794545  |
| H | -2.57562986  | -3.44764062 | -0.43880304 |
| C | -1.22142103  | -1.18477346 | 0.17471419  |
| C | -2.82532273  | 1.10581092  | 0.33796200  |
| C | -1.47158889  | 1.20248340  | 0.55189245  |
| C | -0.62693479  | 0.04925392  | 0.47571543  |
| H | -3.40914972  | 2.02822204  | 0.39569592  |
| H | -1.02151888  | 2.17248490  | 0.77735057  |
| N | -6.78714257  | -1.76163538 | -0.65810742 |
| N | -7.57423964  | -0.80556861 | -0.91883127 |
| C | -8.92994594  | -1.17658662 | -0.90316489 |
| C | -9.80042367  | -0.59501296 | -1.86577594 |
| C | -9.45241968  | -2.07338585 | 0.05016577  |
| C | -11.15305229 | -0.96912208 | -1.87390723 |
| C | -10.80219787 | -2.43584487 | 0.03478020  |
| H | -8.78919119  | -2.43314242 | 0.84226537  |
| C | -11.64361543 | -1.88663301 | -0.93774196 |
| H | -11.83105116 | -0.55305064 | -2.61864019 |
| H | -12.70114429 | -2.16001465 | -0.96518912 |
| O | -5.65878463  | 0.80106734  | -0.08210645 |
| H | -5.18117402  | 1.55476048  | 0.29771809  |
| O | -9.24080347  | 0.25907735  | -2.74319883 |
| C | -10.05684066 | 0.86645229  | -3.73594842 |
| H | -10.86432945 | 1.46420912  | -3.28100467 |
| H | -9.39698880  | 1.52504031  | -4.31480443 |
| H | -10.49887229 | 0.11041981  | -4.40657040 |
| N | 0.71252371   | 0.17825766  | 0.66498351  |
| H | 1.09149565   | 1.04523584  | 1.02582827  |
| H | 1.29689935   | -0.64543511 | 0.74339242  |

|    |              |             |             |
|----|--------------|-------------|-------------|
| S  | -5.19098196  | -4.30746056 | -0.96355065 |
| O  | -4.02679257  | -5.21142271 | -1.05013226 |
| O  | -6.15756080  | -4.66500853 | 0.13375840  |
| O  | -5.94452859  | -4.15376602 | -2.25975533 |
| Na | -7.91119741  | -3.94686546 | -1.13657214 |
| H  | -11.19497269 | -3.12070095 | 0.78968317  |

### 3b

|    |              |             |             |
|----|--------------|-------------|-------------|
| C  | -4.51833996  | -2.70100218 | -0.67192426 |
| C  | -3.16667333  | -2.58700315 | -0.47873983 |
| C  | -2.59107515  | -1.33989191 | -0.11725761 |
| C  | -3.42149654  | -0.18513752 | 0.03003055  |
| C  | -4.84137209  | -0.32553016 | -0.16815589 |
| C  | -5.39515155  | -1.56775272 | -0.52825220 |
| H  | -0.55553009  | -2.07500091 | -0.00350434 |
| H  | -2.52722937  | -3.45984061 | -0.61339640 |
| C  | -1.19467412  | -1.19408668 | 0.09797610  |
| C  | -2.83664536  | 1.06200023  | 0.35061479  |
| C  | -1.45805371  | 1.18886746  | 0.55589878  |
| C  | -0.64252017  | 0.02092517  | 0.42919669  |
| H  | -3.44195807  | 1.96931413  | 0.41930655  |
| N  | -6.76996208  | -1.80675771 | -0.63375917 |
| N  | -7.52708518  | -0.85679020 | -0.97195481 |
| C  | -8.89776513  | -1.16047567 | -0.88988905 |
| C  | -9.76745294  | -0.60286705 | -1.86754661 |
| C  | -9.43068795  | -1.95736002 | 0.14364337  |
| C  | -11.14013294 | -0.89078245 | -1.79878302 |
| C  | -10.79822676 | -2.23356670 | 0.20257796  |
| H  | -8.75852715  | -2.30029513 | 0.93538980  |
| C  | -11.64429127 | -1.70185275 | -0.77702189 |
| H  | -11.82215250 | -0.48869814 | -2.54733536 |
| H  | -12.71709174 | -1.90665980 | -0.74271540 |
| O  | -5.65378066  | 0.72687750  | 0.02895442  |
| H  | -5.19503793  | 1.40652572  | 0.54807859  |
| O  | -9.19394775  | 0.14100627  | -2.82943337 |
| C  | -10.01067722 | 0.71542118  | -3.84242259 |
| H  | -10.76167920 | 1.39857573  | -3.41195633 |
| H  | -9.33485318  | 1.28055076  | -4.49648121 |
| H  | -10.52303398 | -0.06463440 | -4.42992623 |
| S  | -5.15597244  | -4.31756897 | -1.14464233 |
| O  | -3.98531794  | -5.18577265 | -1.38082510 |
| O  | -6.03531026  | -4.77648399 | -0.00916325 |
| O  | -6.00988985  | -4.08642945 | -2.36508001 |
| Na | -7.89156702  | -3.99365758 | -1.04068808 |



|   |              |             |            |
|---|--------------|-------------|------------|
| H | 0.43481255   | 0.11155007  | 0.59076174 |
| N | -0.87544557  | 2.39853909  | 0.82181255 |
| H | -1.46617172  | 3.16143852  | 1.13379127 |
| H | 0.06709119   | 2.40499191  | 1.19498885 |
| H | -11.20166494 | -2.83449032 | 1.02026928 |

### 3c

|   |              |             |             |
|---|--------------|-------------|-------------|
| C | -4.54249588  | -2.67662424 | -0.79464187 |
| C | -3.19556962  | -2.59420414 | -0.55544176 |
| C | -2.59656424  | -1.36633626 | -0.15346640 |
| C | -3.43499498  | -0.21197750 | -0.07442988 |
| C | -4.84152884  | -0.31447588 | -0.31989468 |
| C | -5.42100425  | -1.55368210 | -0.67849529 |
| H | -2.59993890  | -3.48795589 | -0.70571838 |
| C | -1.20111583  | -1.23923995 | 0.16363523  |
| C | -2.83034603  | 1.04195765  | 0.24414502  |
| C | -1.49808161  | 1.15189519  | 0.50765311  |
| C | -0.62086897  | 0.01198558  | 0.50295192  |
| H | -3.42094674  | 1.96047258  | 0.26497630  |
| H | -1.06178693  | 2.12587243  | 0.74002350  |
| N | -6.78761453  | -1.79702778 | -0.81140730 |
| N | -7.57885322  | -0.83501987 | -1.01797578 |
| C | -8.93580760  | -1.19804377 | -0.95396161 |
| C | -9.85037890  | -0.54767062 | -1.82755156 |
| C | -9.41560430  | -2.14405479 | -0.02467407 |
| C | -11.20890874 | -0.89945896 | -1.77320437 |
| C | -10.76947193 | -2.48269291 | 0.02202229  |
| H | -8.71351547  | -2.55805877 | 0.70481799  |
| C | -11.65785474 | -1.86145074 | -0.86259710 |
| H | -11.92385427 | -0.42769536 | -2.44662361 |
| H | -12.72077726 | -2.11348945 | -0.83732206 |
| O | -5.64166007  | 0.74951863  | -0.18250784 |
| H | -5.18563874  | 1.47531473  | 0.27102469  |
| O | -9.33046997  | 0.34807088  | -2.68514414 |
| C | -10.19525062 | 1.02993116  | -3.58523178 |
| H | -10.95561058 | 1.61640387  | -3.04284969 |
| H | -9.55835363  | 1.70734446  | -4.16776683 |
| H | -10.69842118 | 0.32352013  | -4.26645220 |
| N | 0.66884569   | 0.22580598  | 0.80549825  |
| H | 0.97251147   | 1.15788225  | 1.05862015  |
| H | 1.32241373   | -0.54955926 | 0.85576357  |
| S | -5.15633181  | -4.29591084 | -1.33162185 |
| O | -3.97088032  | -5.15602085 | -1.51213229 |
| O | -6.09799014  | -4.77046429 | -0.25873401 |

|    |              |             |             |
|----|--------------|-------------|-------------|
| O  | -5.92930498  | -4.03121570 | -2.59555803 |
| Na | -7.89395111  | -3.96409859 | -1.40053741 |
| S  | -0.21468910  | -2.70982261 | 0.18035647  |
| O  | -0.34172867  | -3.49340381 | -1.05274620 |
| O  | 1.14773800   | -2.40801899 | 0.63914037  |
| O  | -0.97776630  | -3.52835222 | 1.37018449  |
| H  | -0.86925722  | -4.48792287 | 1.21178293  |
| H  | -11.12938036 | -3.20278264 | 0.75994399  |

#### 4a

|   |              |             |             |
|---|--------------|-------------|-------------|
| C | -4.60837657  | -2.66380935 | -0.46139553 |
| C | -3.25817468  | -2.57609128 | -0.27196704 |
| C | -2.63257411  | -1.31265689 | -0.03517732 |
| C | -3.44797393  | -0.13345491 | -0.00971857 |
| C | -4.85830300  | -0.24005332 | -0.21531210 |
| C | -5.46499817  | -1.50176018 | -0.45195835 |
| H | -0.64390733  | -2.13015498 | 0.15311580  |
| H | -2.64997859  | -3.47994215 | -0.30212853 |
| C | -1.24571957  | -1.21810802 | 0.17248097  |
| C | -2.79742635  | 1.11392247  | 0.21413177  |
| C | -1.44093753  | 1.19276451  | 0.41540871  |
| C | -0.62259800  | 0.01781187  | 0.40339799  |
| H | -3.36018726  | 2.05115577  | 0.22109644  |
| H | -0.96805571  | 2.16365993  | 0.58235794  |
| N | -6.82431015  | -1.72102640 | -0.60539446 |
| N | -7.59373018  | -0.74944411 | -0.87256721 |
| C | -8.94868103  | -1.11062777 | -0.87943008 |
| C | -9.82250929  | -0.49712019 | -1.82443912 |
| C | -9.46416784  | -2.06060659 | 0.00875061  |
| C | -11.15911698 | -0.92213691 | -1.89111515 |
| C | -10.78832846 | -2.50455013 | -0.09558518 |
| H | -8.81293459  | -2.43271811 | 0.80434838  |
| C | -11.63288292 | -1.93535748 | -1.05073581 |
| H | -11.83721650 | -0.48580779 | -2.62364386 |
| H | -12.66516071 | -2.27502678 | -1.14628949 |
| O | -5.63952244  | 0.84358750  | -0.15717192 |
| H | -5.13755202  | 1.61335562  | 0.15296985  |
| O | -9.27839245  | 0.42916611  | -2.62463116 |
| C | -10.08501765 | 1.06790129  | -3.60907034 |
| H | -10.92549745 | 1.60966704  | -3.14491339 |
| H | -9.42938689  | 1.78076653  | -4.12435782 |
| H | -10.47645388 | 0.33679715  | -4.33555212 |
| N | 0.71728995   | 0.12501390  | 0.58776783  |
| H | 1.12429605   | 1.00657504  | 0.87471571  |

|    |              |             |             |
|----|--------------|-------------|-------------|
| H  | 1.28867178   | -0.70487647 | 0.69084878  |
| S  | -5.27573593  | -4.32478264 | -0.72864362 |
| O  | -4.12302183  | -5.24579117 | -0.78231741 |
| O  | -6.20604730  | -4.58795643 | 0.42628699  |
| O  | -6.06829136  | -4.26852321 | -2.00874953 |
| Na | -8.01778135  | -4.09729871 | -0.84727692 |
| C  | -11.20917363 | -3.64334452 | 0.78242731  |
| F  | -11.13356470 | -3.35725516 | 2.09247486  |
| F  | -12.44644300 | -4.07925220 | 0.52958496  |
| F  | -10.36391658 | -4.71235275 | 0.59015624  |

**5a**

|   |              |             |             |
|---|--------------|-------------|-------------|
| C | -4.77841768  | -2.59856806 | -0.11801401 |
| C | -3.44769357  | -2.57613797 | 0.19049794  |
| C | -2.71116604  | -1.35088090 | 0.14233132  |
| C | -3.39327896  | -0.14574653 | -0.23274280 |
| C | -4.78814640  | -0.18486131 | -0.53779738 |
| C | -5.50709516  | -1.40786696 | -0.49076110 |
| H | -0.84039719  | -2.24974928 | 0.73338288  |
| H | -2.93926882  | -3.49720753 | 0.47374779  |
| C | -1.34090243  | -1.32012667 | 0.45149191  |
| C | -2.63221649  | 1.05725196  | -0.27902075 |
| C | -1.29329422  | 1.07443674  | 0.02611113  |
| C | -0.60675485  | -0.12446286 | 0.40473720  |
| H | -3.09566661  | 2.00685993  | -0.56070294 |
| H | -0.73347444  | 2.01187011  | -0.01713808 |
| N | -6.85385579  | -1.58397104 | -0.71594549 |
| N | -7.63857057  | -0.61338558 | -0.94105046 |
| C | -8.98214084  | -1.03762516 | -0.93403318 |
| C | -9.96584478  | -0.37543399 | -1.72163598 |
| C | -9.36907504  | -2.11740445 | -0.13734018 |
| C | -11.28007191 | -0.87896775 | -1.73256556 |
| C | -10.66100242 | -2.63662129 | -0.20106326 |
| H | -8.60842157  | -2.55101119 | 0.51195983  |
| C | -11.62385256 | -2.02404734 | -1.00184735 |
| H | -12.04283353 | -0.39979170 | -2.34550500 |
| H | -12.63259995 | -2.43579460 | -1.06114851 |
| O | -5.45040282  | 0.92318045  | -0.88022916 |
| H | -4.85875105  | 1.69182256  | -0.88310758 |
| O | -9.55019409  | 0.67818712  | -2.44019197 |
| C | -10.48089778 | 1.37557503  | -3.26049103 |
| H | -11.30729934 | 1.79081519  | -2.66033256 |
| H | -9.92131386  | 2.19458158  | -3.72922162 |
| H | -10.89275629 | 0.71627889  | -4.04252092 |

|    |              |             |             |
|----|--------------|-------------|-------------|
| N  | 0.71053264   | -0.07947370 | 0.71953828  |
| H  | 1.24415453   | 0.77018131  | 0.58495251  |
| S  | -5.56864629  | -4.22699320 | -0.09452021 |
| O  | -4.56675702  | -5.18278775 | 0.41276388  |
| O  | -6.79312059  | -4.14696148 | 0.79613016  |
| O  | -6.00238659  | -4.49110142 | -1.51006326 |
| Na | -8.18651337  | -4.24476664 | -1.35405442 |
| S  | -10.90212663 | -4.22123344 | 0.58960652  |
| O  | -10.48108667 | -4.07163187 | 2.02520764  |
| O  | -12.28954850 | -4.65614127 | 0.37219900  |
| O  | -9.85414612  | -5.10265597 | -0.09237204 |
| Na | -8.44692399  | -5.09213725 | 1.85921149  |
| H  | 1.22618674   | -0.93163810 | 0.90190271  |

# Copies of $^1\text{H}$ and $^{13}\text{C}$ NMR Spectra

## Sodium 7-amino-3-((2,5-dimethoxyphenyl)diazonyl)-4-hydroxynaphthalene-2-sulfonate (1a)

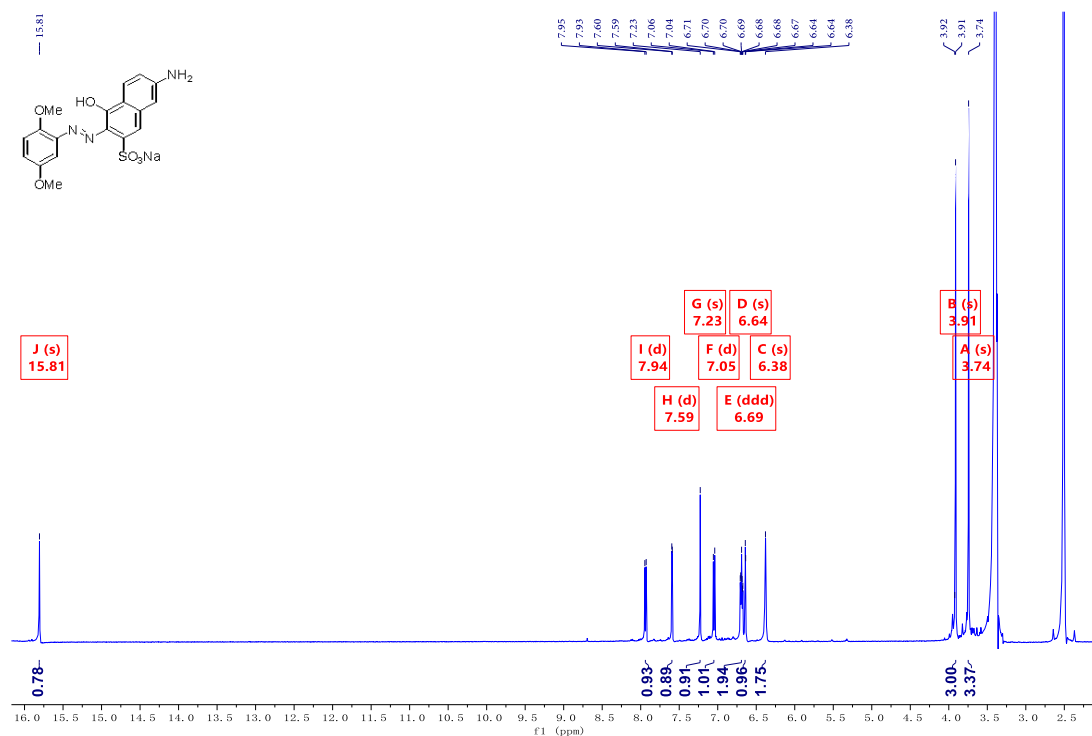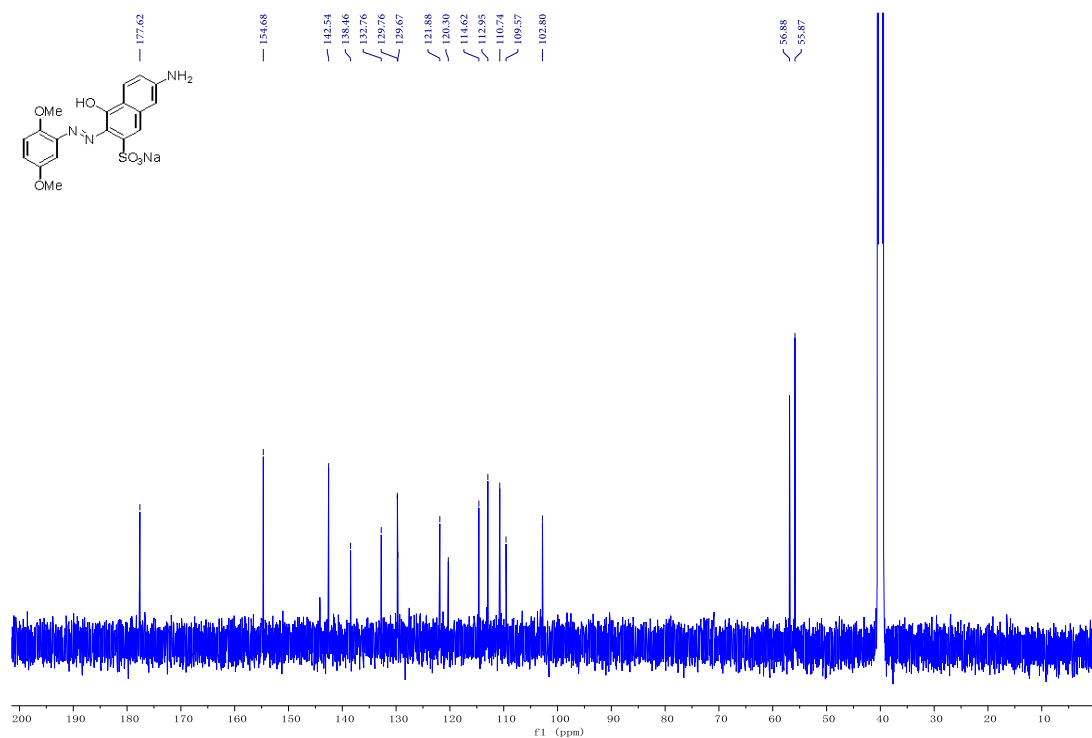

# Sodium 6-amino-3-((2,5-dimethoxyphenyl)diazenyl)-4-hydroxynaphthalene-2-sulfonate (1b)

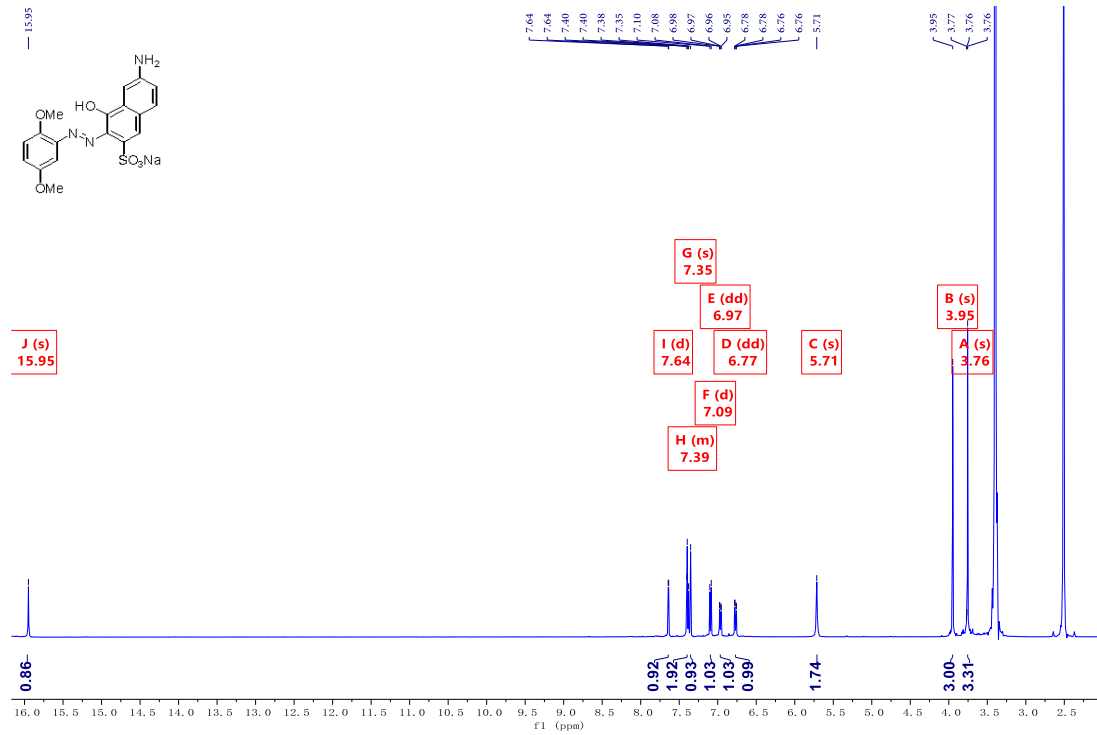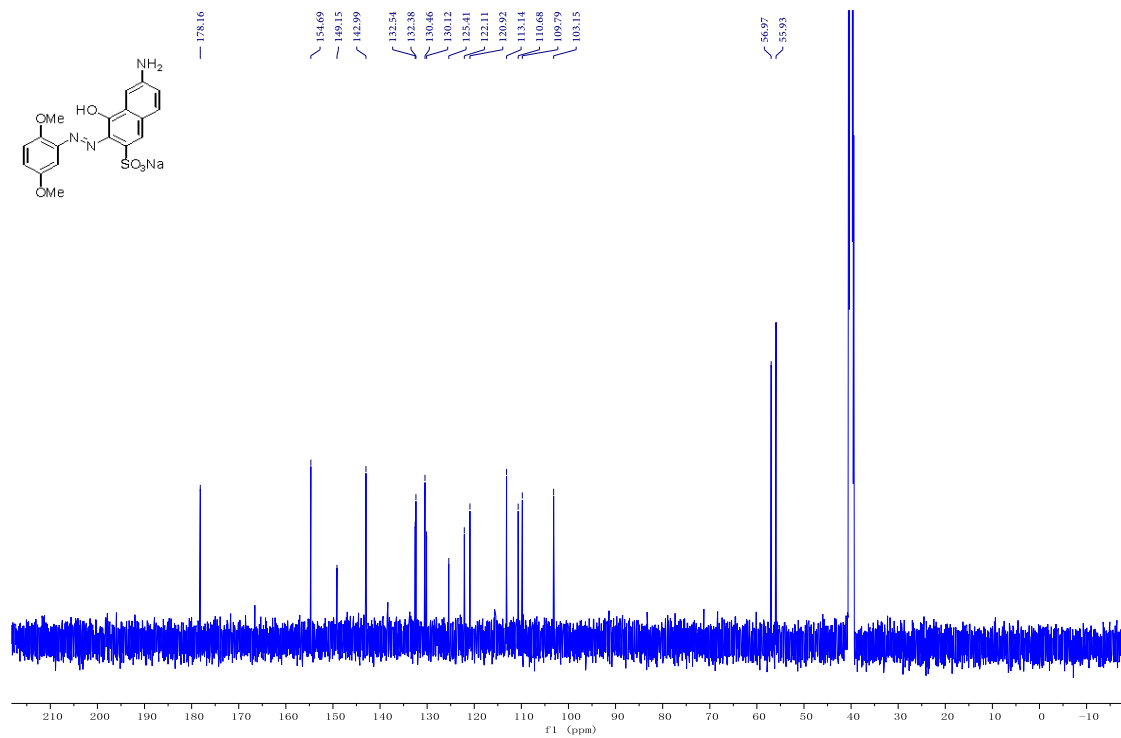

# Sodium 7-amino-3-((2,5-dimethoxyphenyl)diazenyl)-4-hydroxy-8-sulfonaphthalene-2-sulfonate (1c)

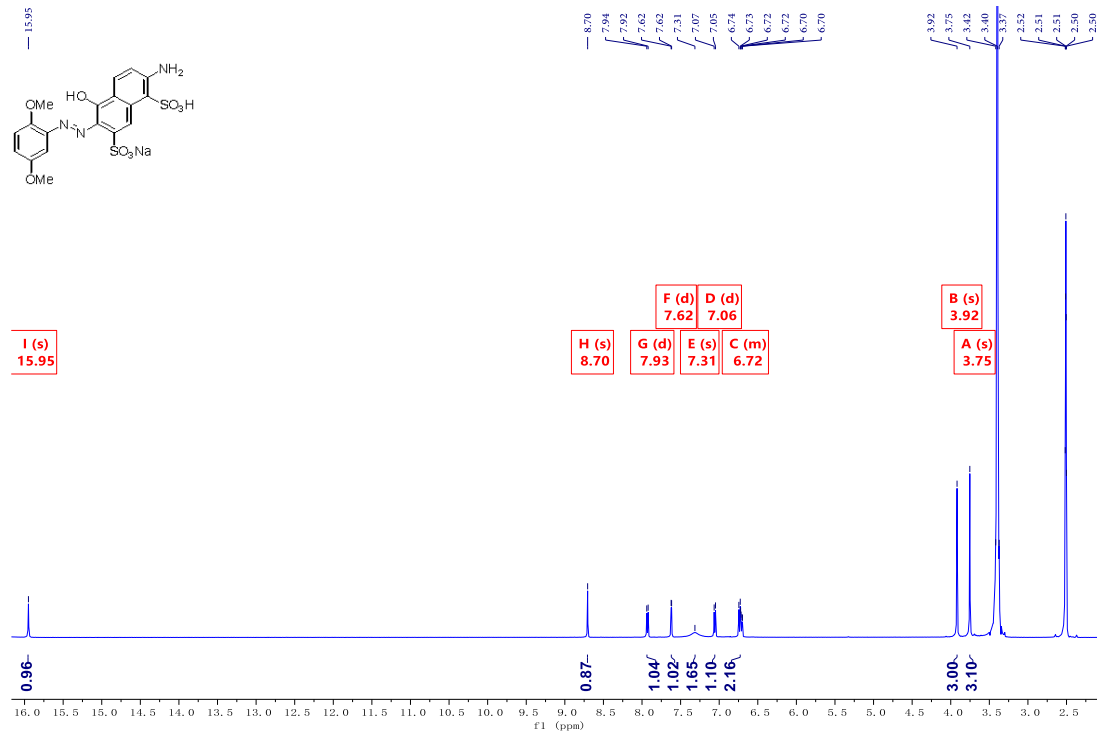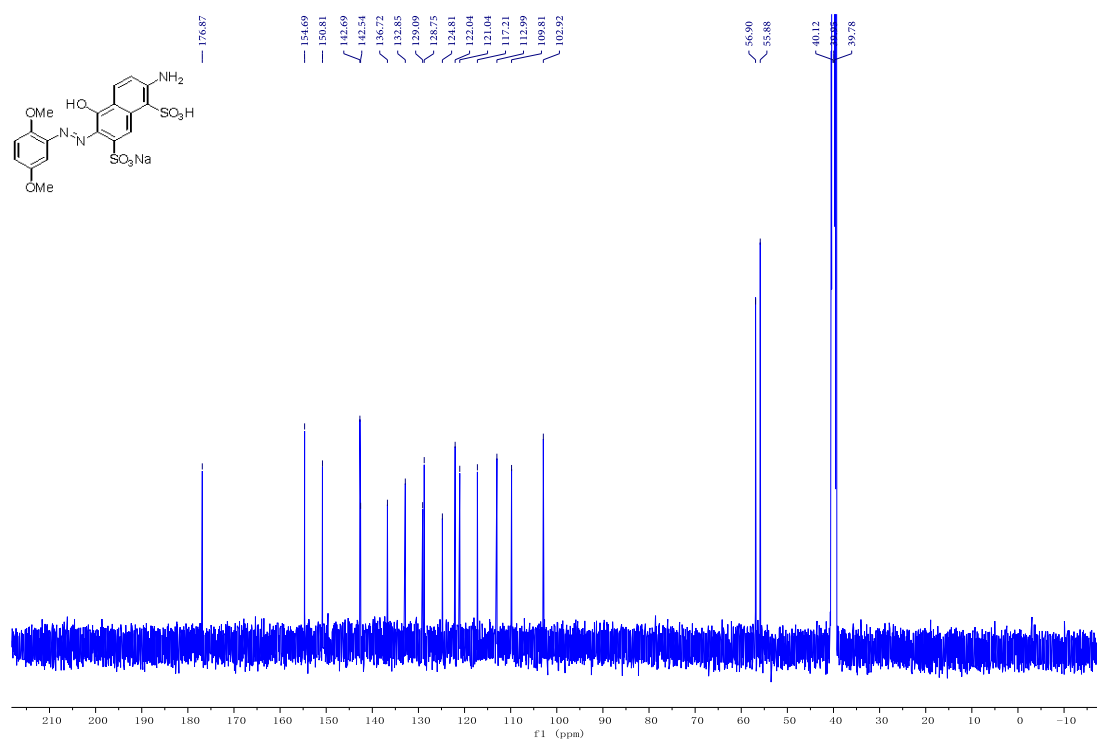

# Sodium 7-amino-4-hydroxy-3-((2-methoxy-5-methylphenyl)diazenyl)naphthalene-2-sulfonate (2a)

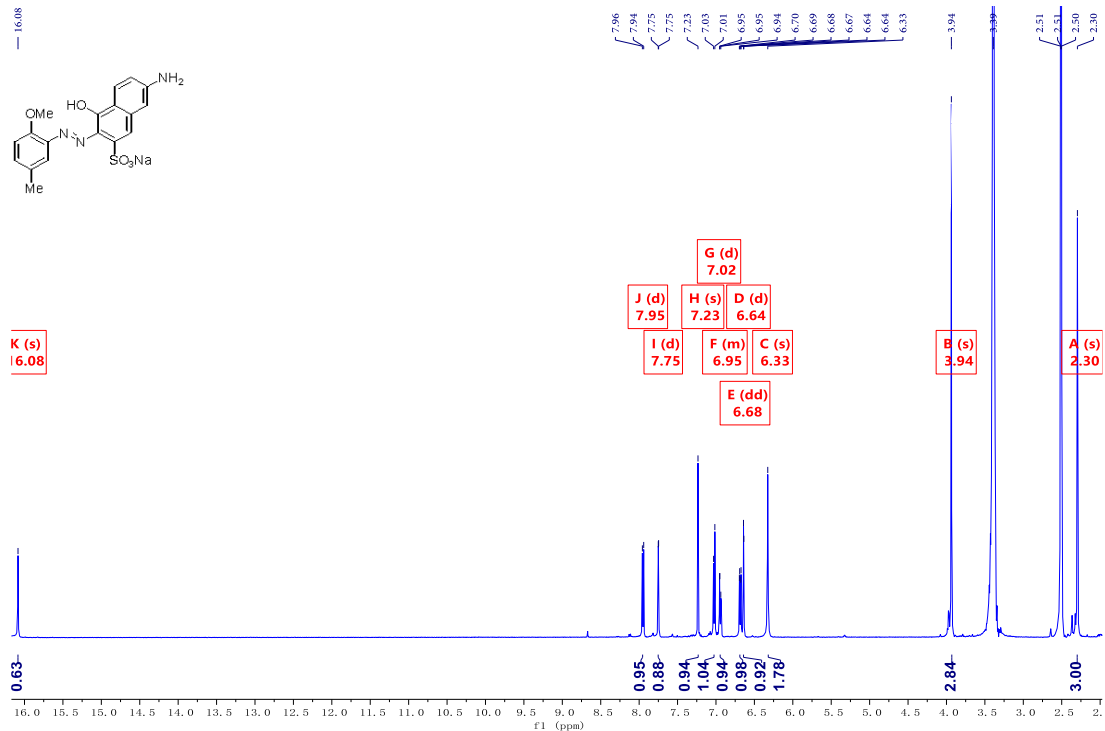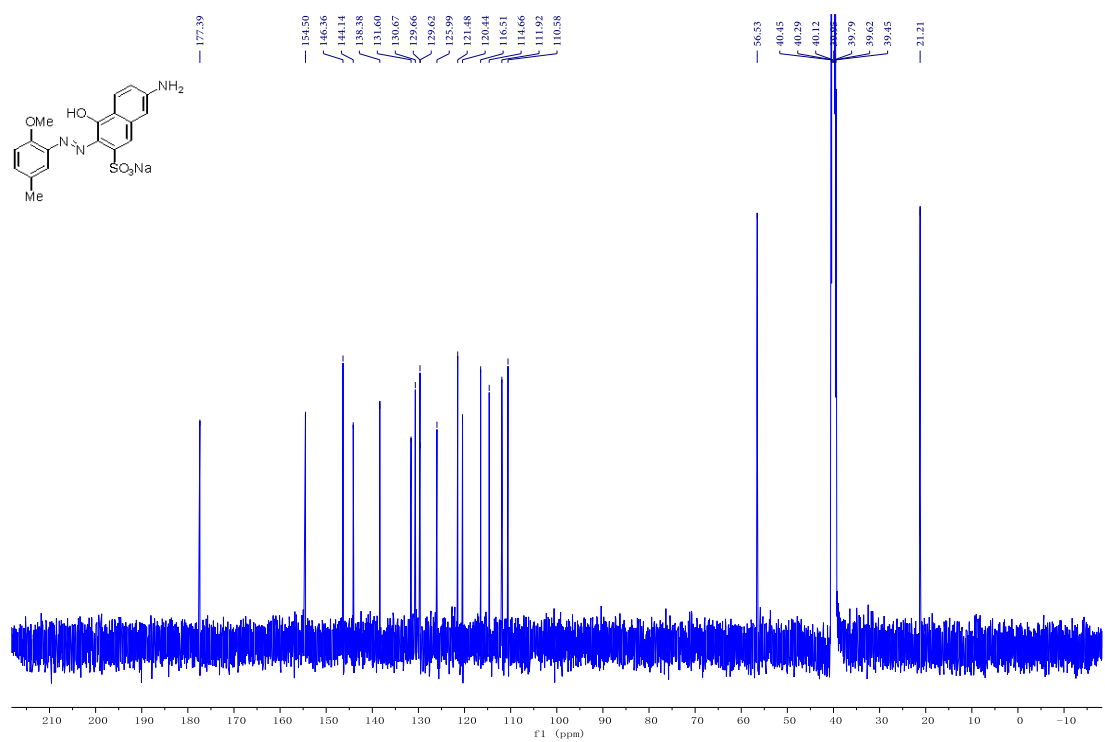



# Sodium 6-amino-4-hydroxy-3-((2-methoxy-5-methylphenyl)diazenyl)naphthalene-2-sulfonate (2b)

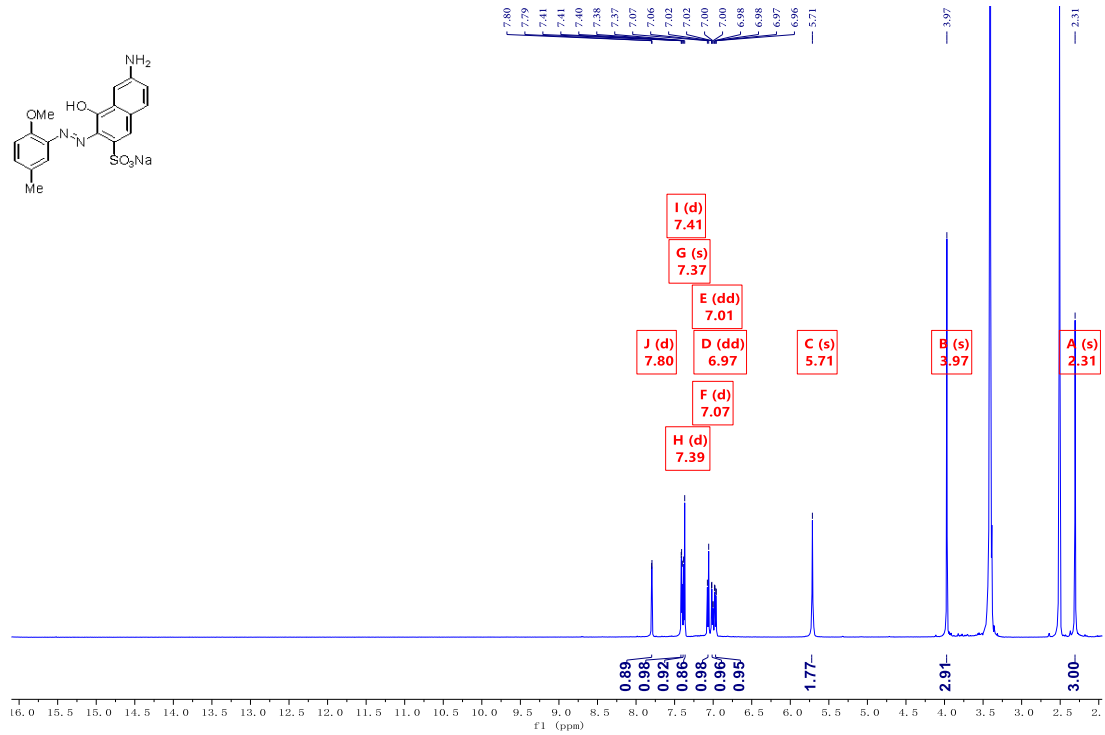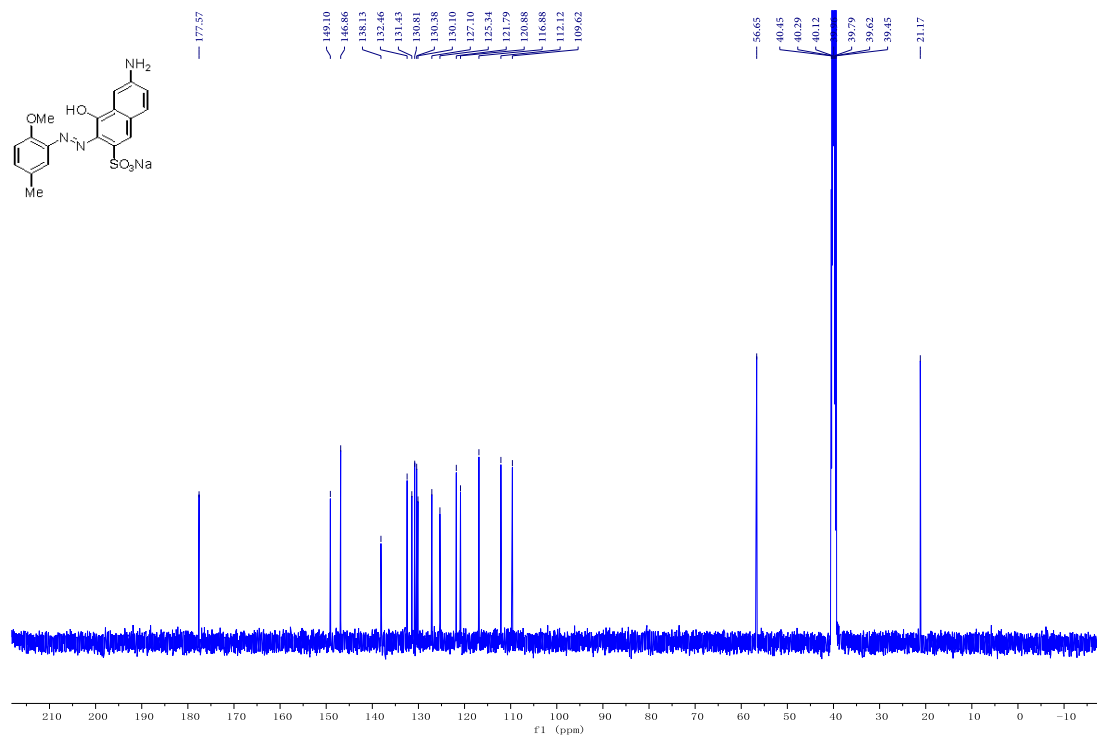

Sodium 7-amino-4-hydroxy-3-((2-methoxy-5-methylphenyl)diazenyl)-8-sulfonaphthalene-2-sulfonate (2c)

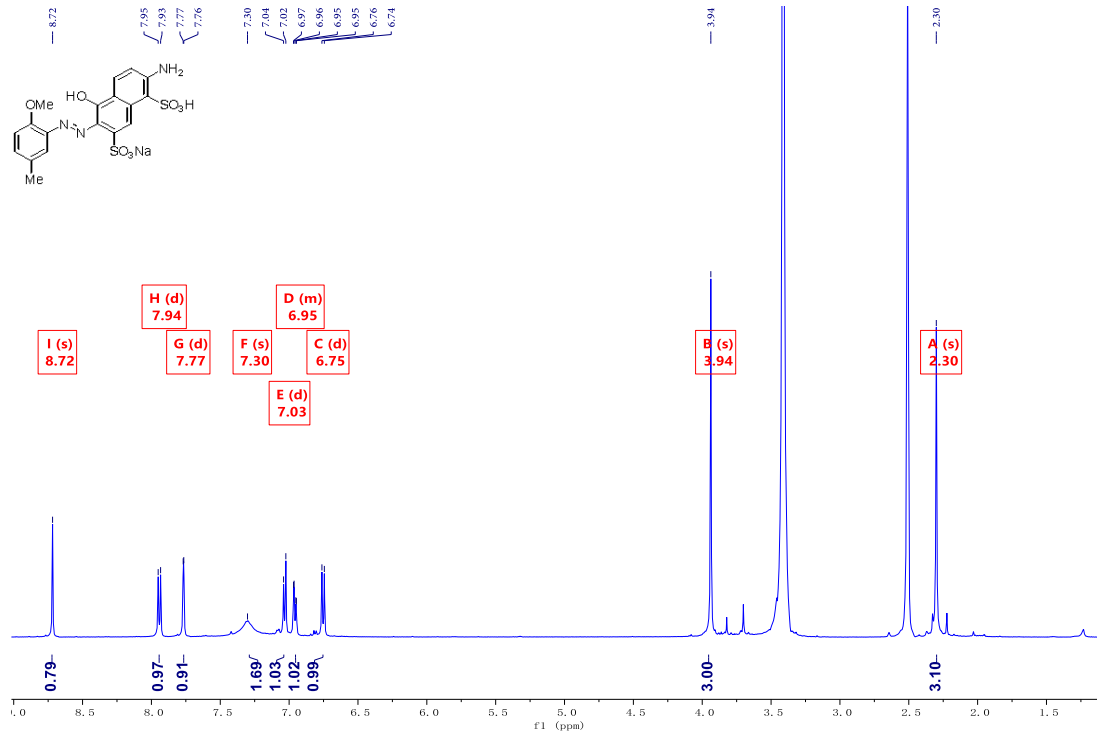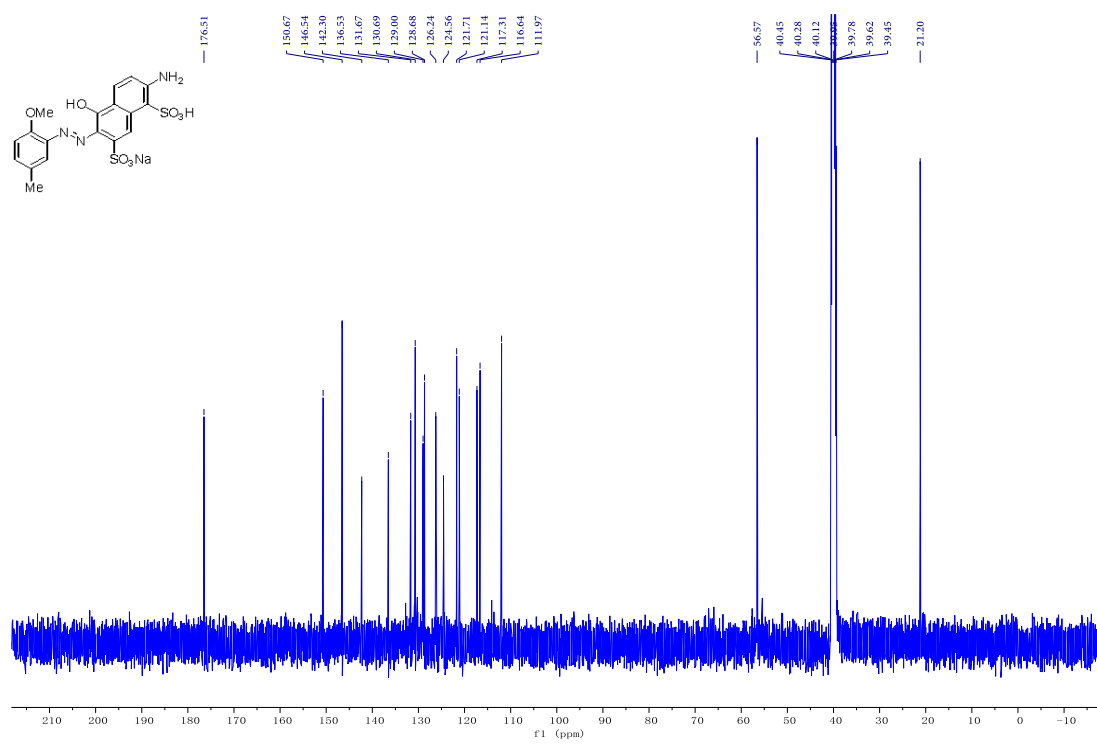

# Sodium 7-amino-4-hydroxy-3-((2-methoxyphenyl)diazenyl)naphthalene-2-sulfonate (3a)

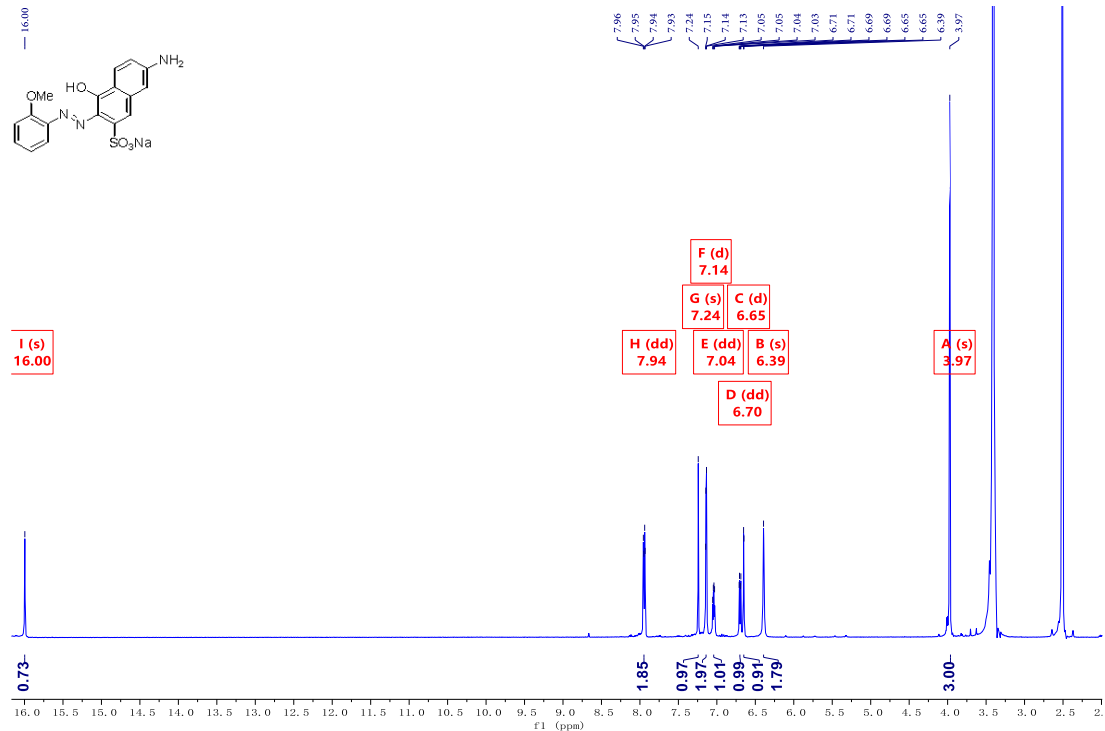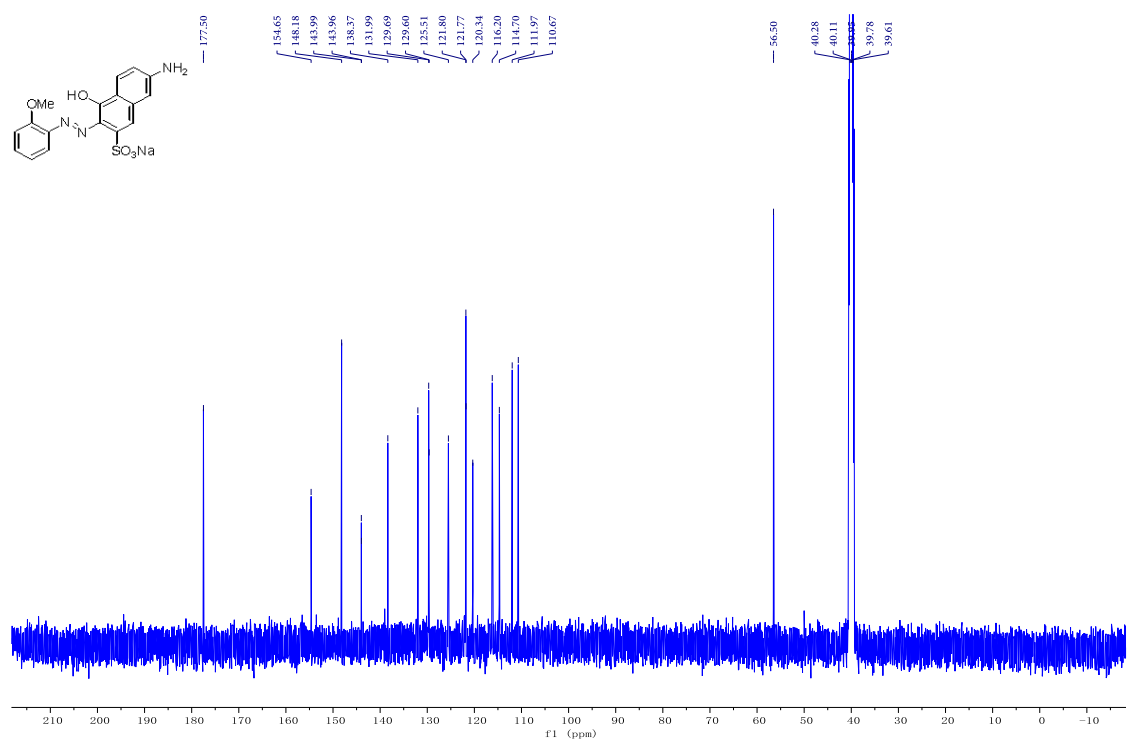

Sodium 6-amino-4-hydroxy-3-((2-methoxyphenyl)diazenyl)naphthalene-2-sulfonate (3b)

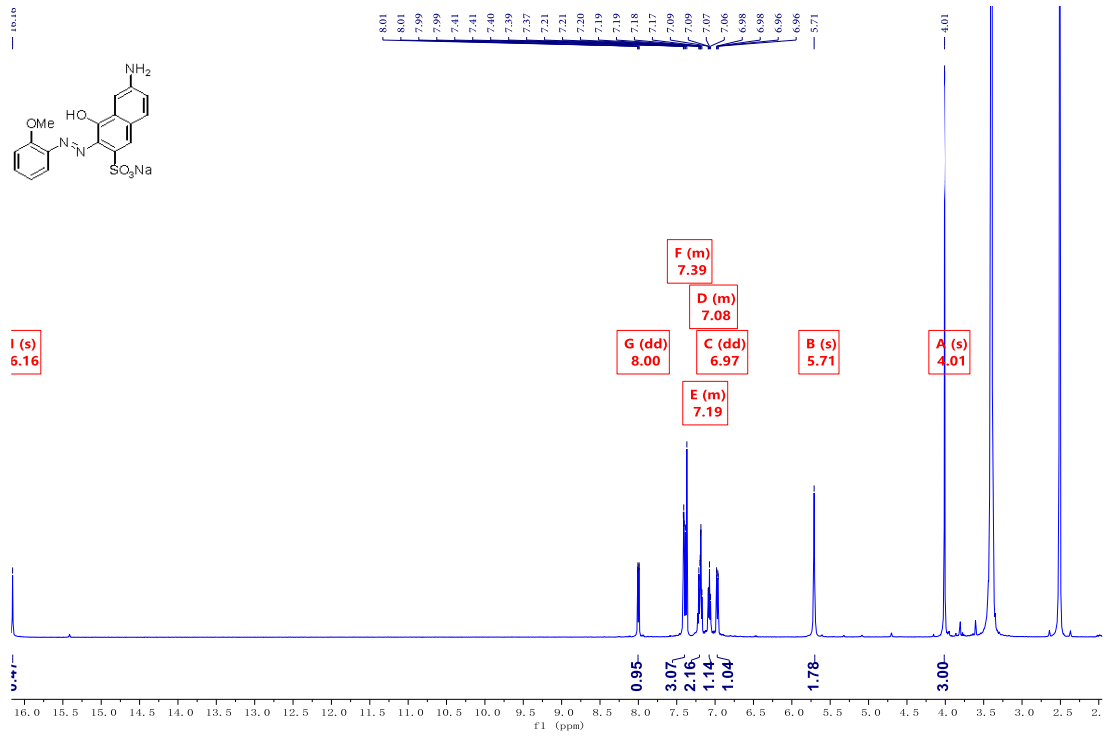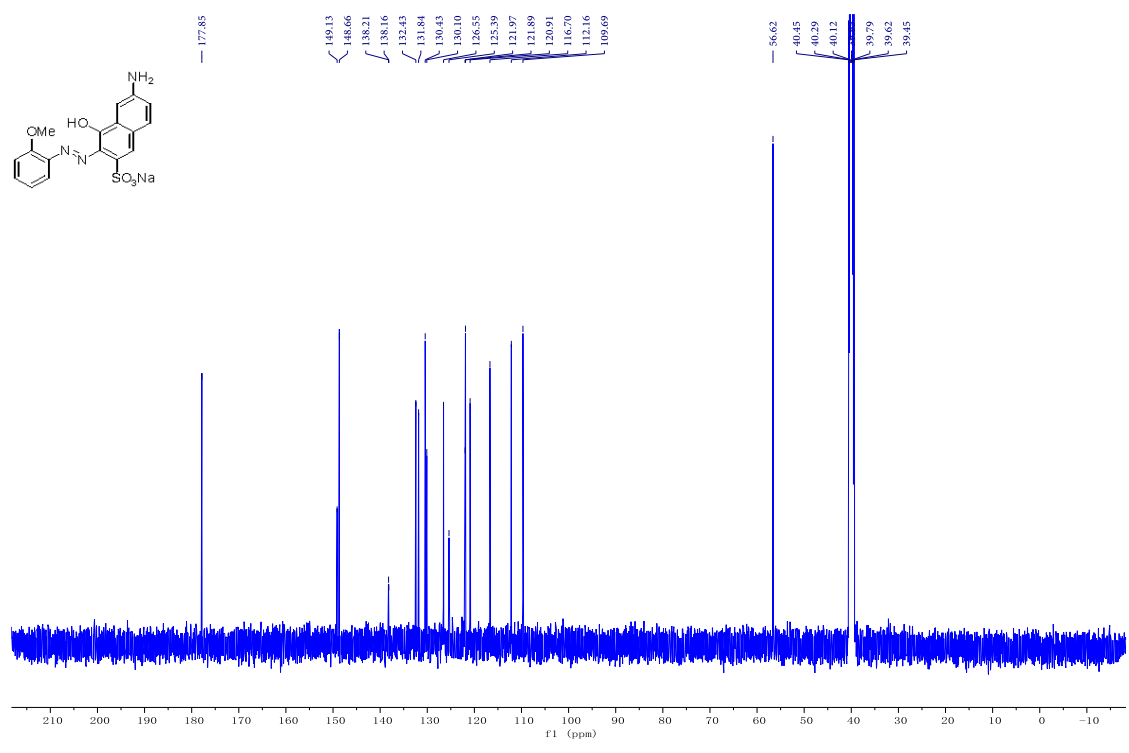

# Sodium 7-amino-4-hydroxy-3-((2-methoxyphenyl)diazenyl)-8-sulfonaphthalene-2-sulfonate (3c)

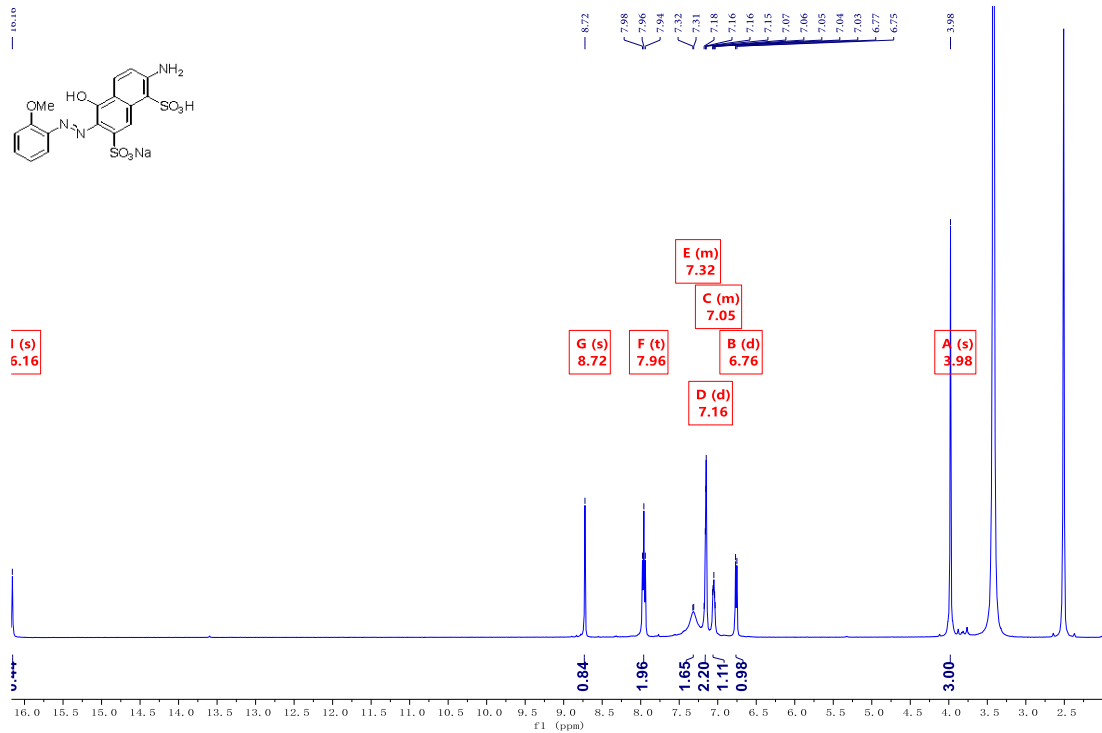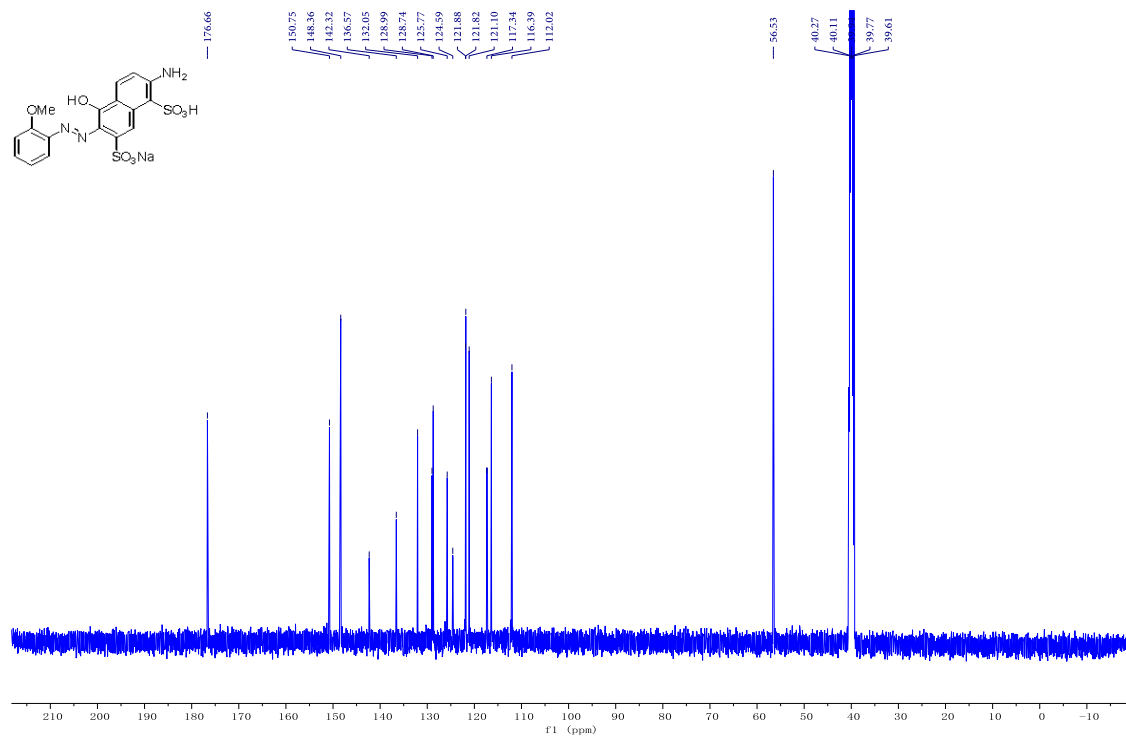

# Sodium 7-amino-4-hydroxy-3-((2-methoxy-5-sulfonatophenyl)diazenyl)naphthalene-2-sulfonate (4a)

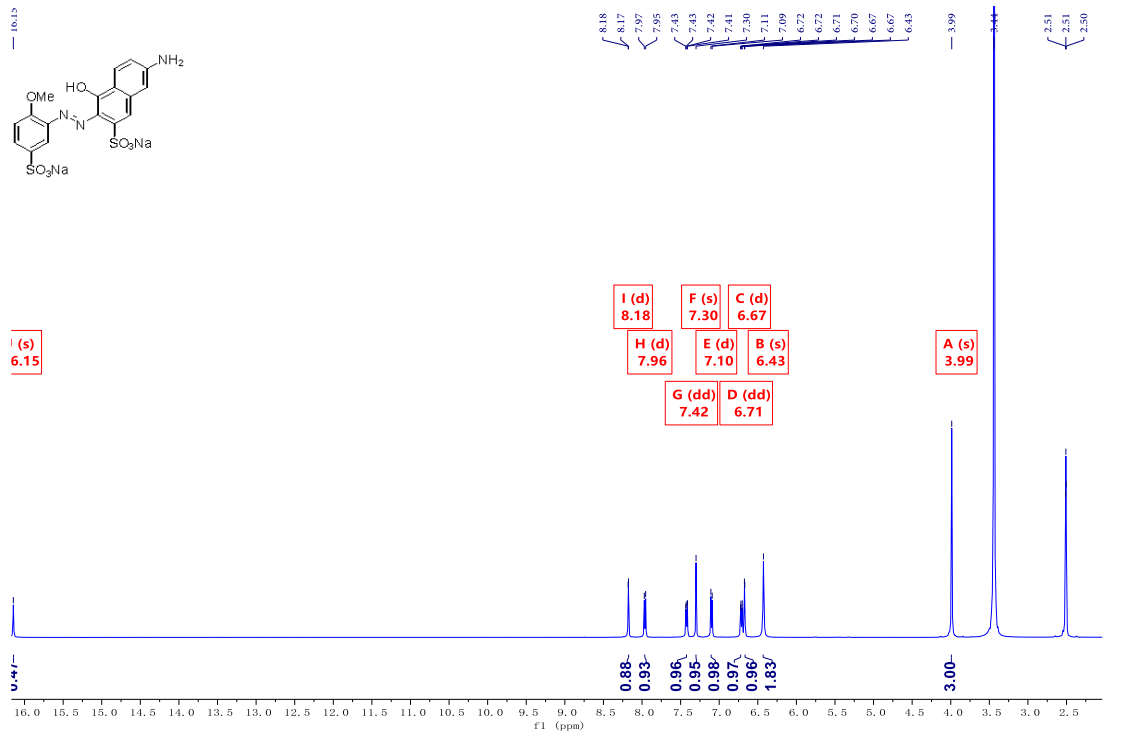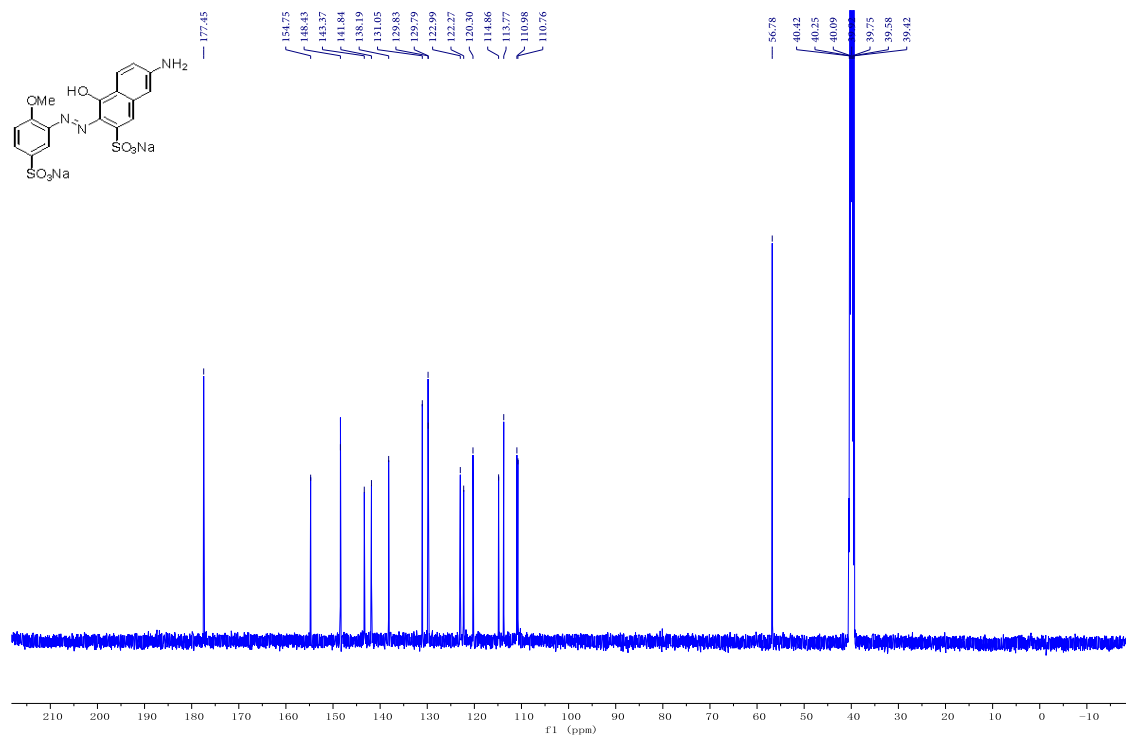

# Sodium 6-amino-4-hydroxy-3-((2-methoxy-5-sulfonatophenyl)diazenyl)naphthalene-2-sulfonate (4b)

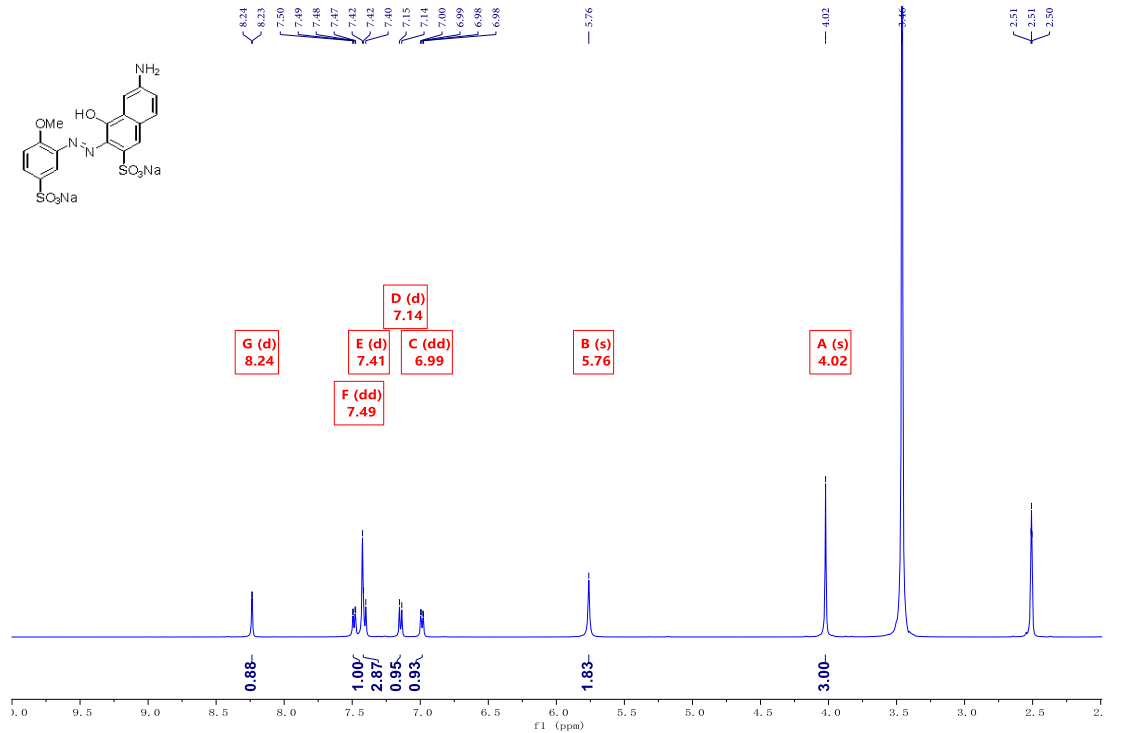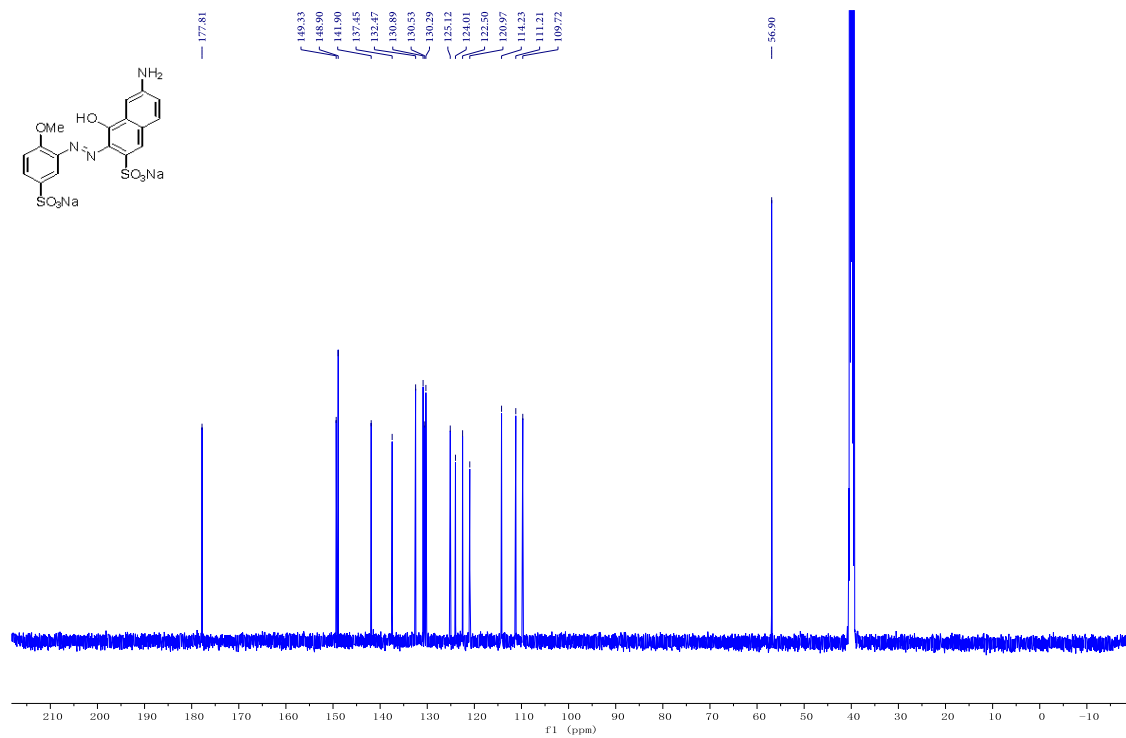

Sodium 7-amino-4-hydroxy-3-((2-methoxy-5-sulfonatophenyl)diazenyl)-8-sulfonaphthalene-2-sulfonate (4c')

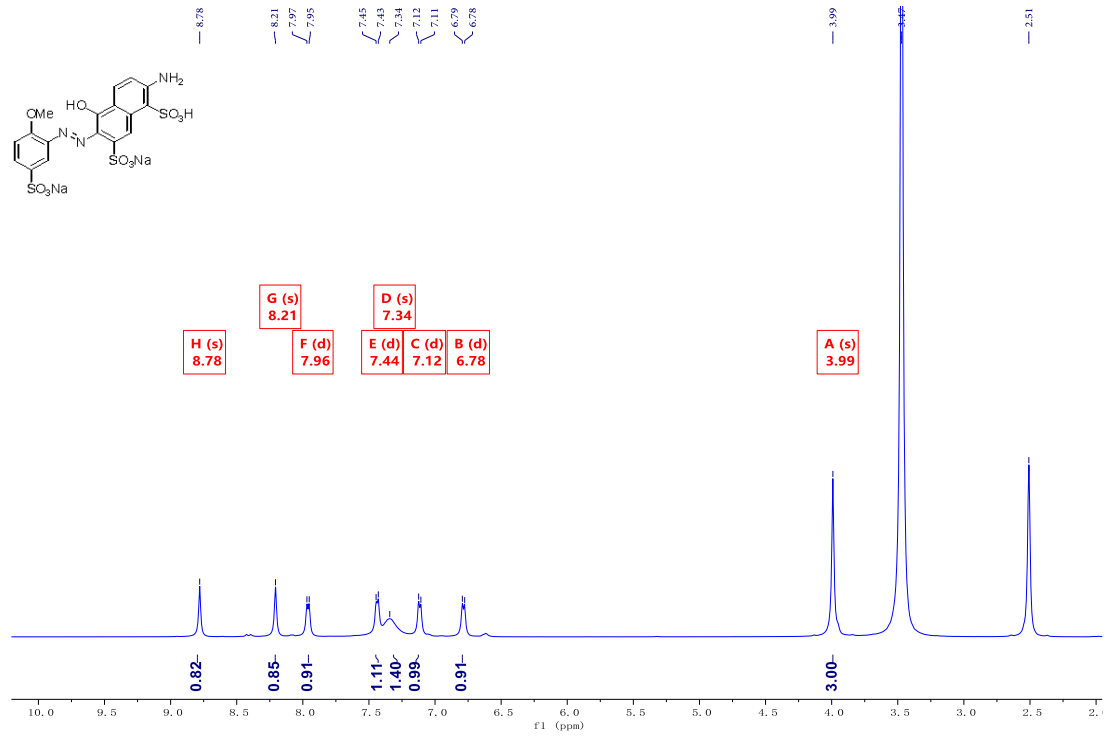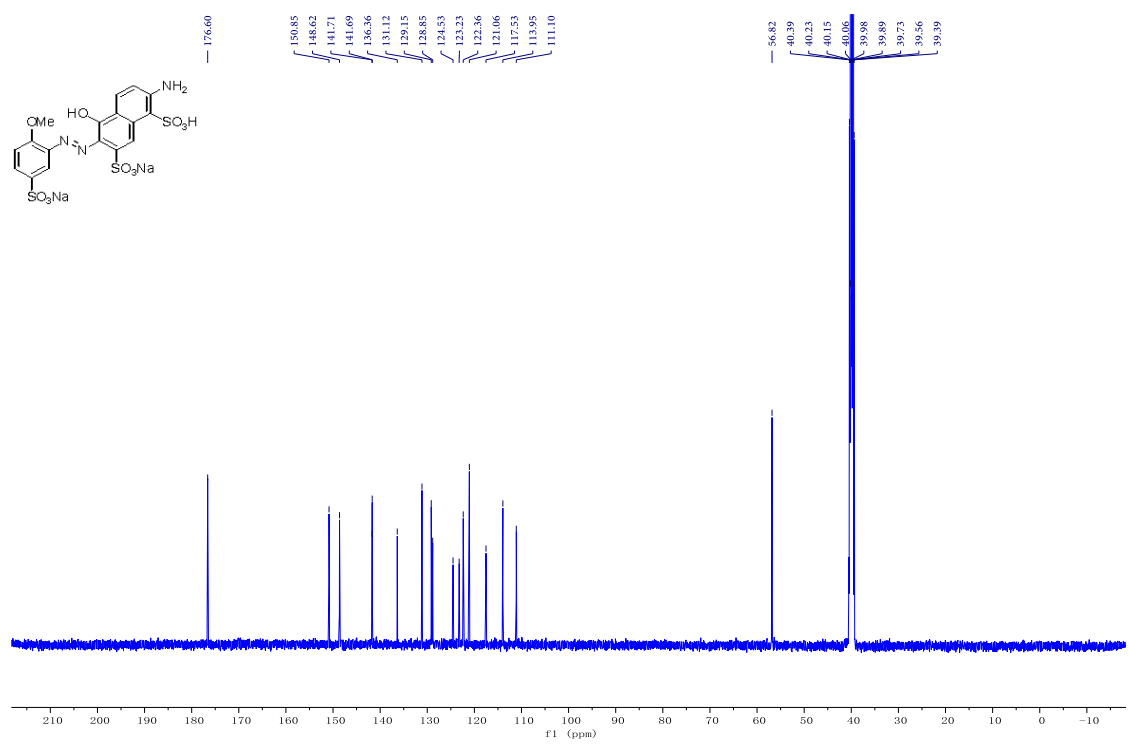



# Sodium 7-(4-aminobenzamido)-4-hydroxy-3-((2-methoxy-5-sulfonatophenyl) diazenyl) naphthalene-2-sulfonate (4d)

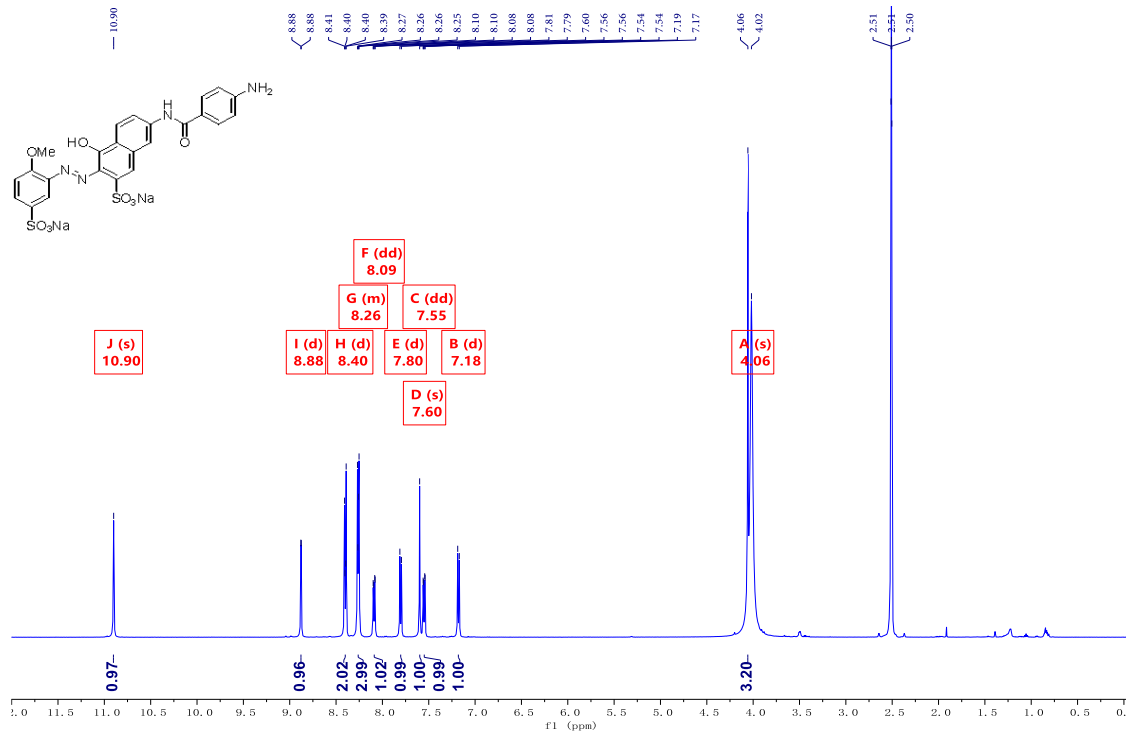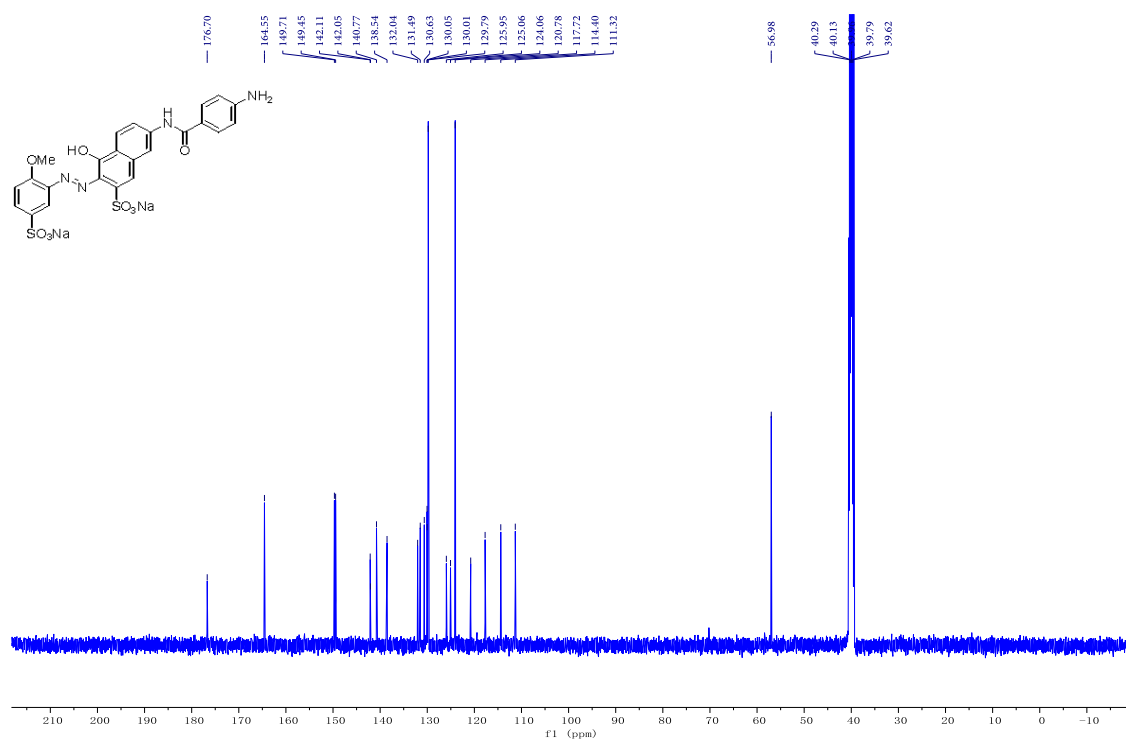

Sodium 7-benzamido-4-hydroxy-3-((2-methoxy-5-sulfonatophenyl)diazenyl)naphthalene-2-sulfonate (4e)

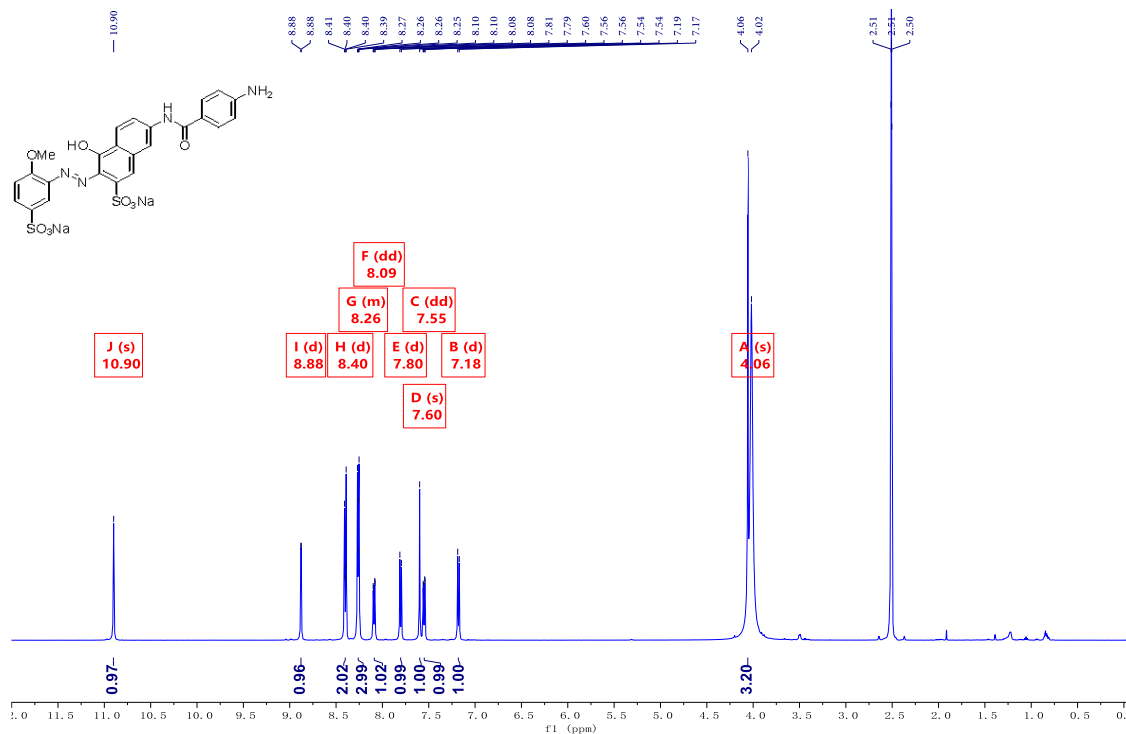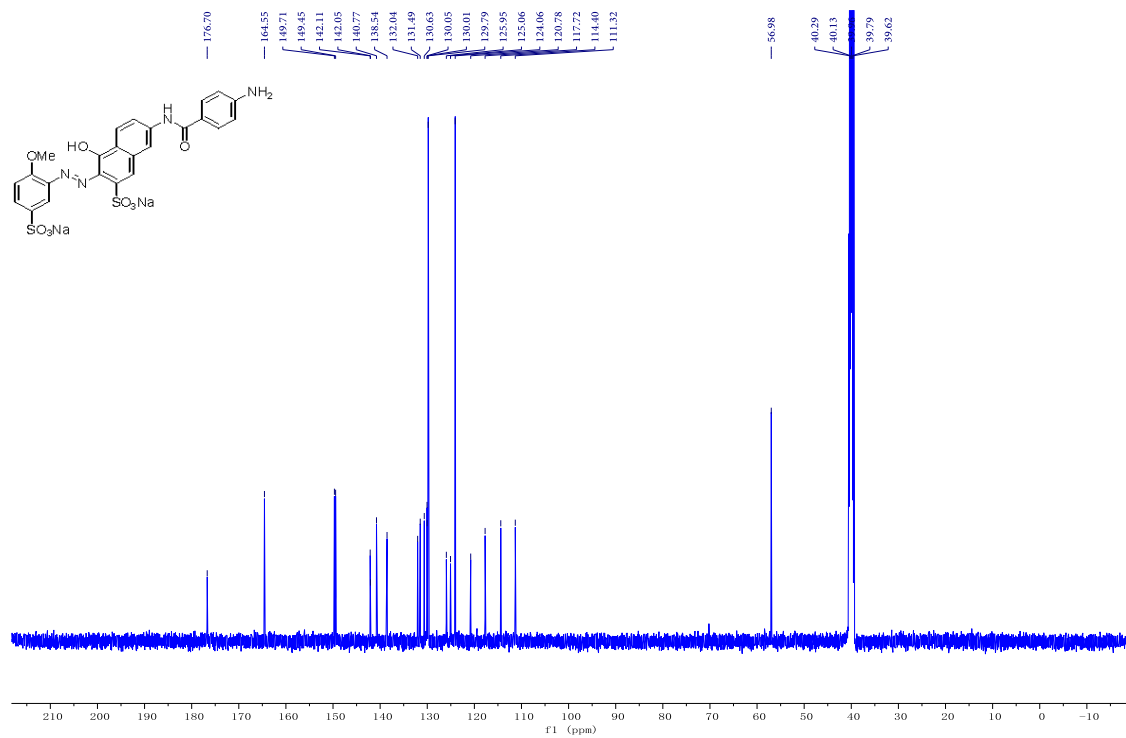

# Sodium 4-hydroxy-3-((2-methoxy-5-sulfonatophenyl)diazenyl)-7-(4-nitrobenzamido)naphthalene-2-sulfonate (4f)

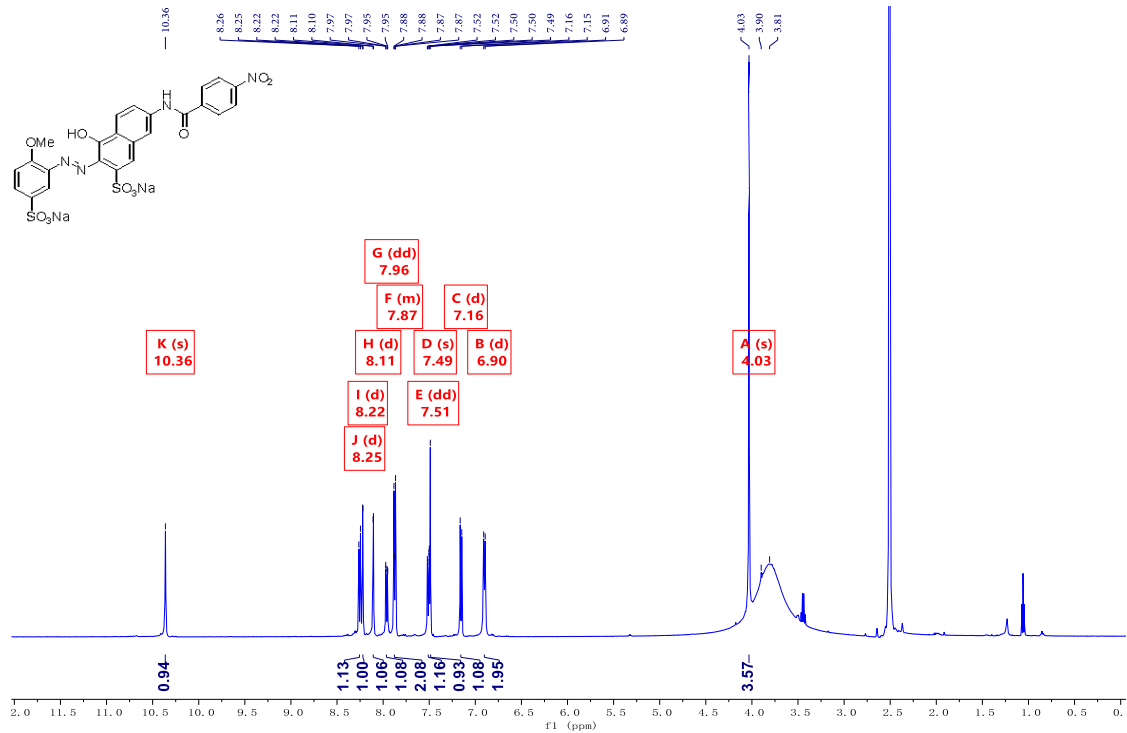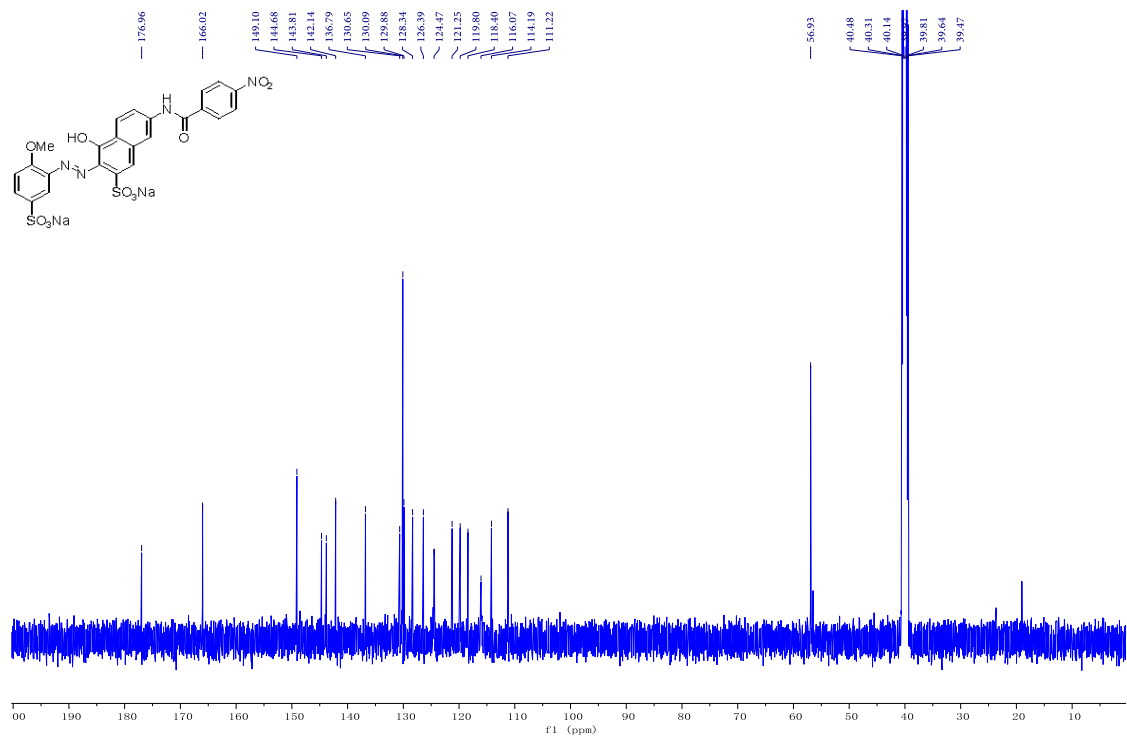

Sodium 7-amino-4-hydroxy-3-((2-methoxy-5-(trifluoromethyl)phenyl)diazenyl)naphthalene-2-sulfonate (5a)

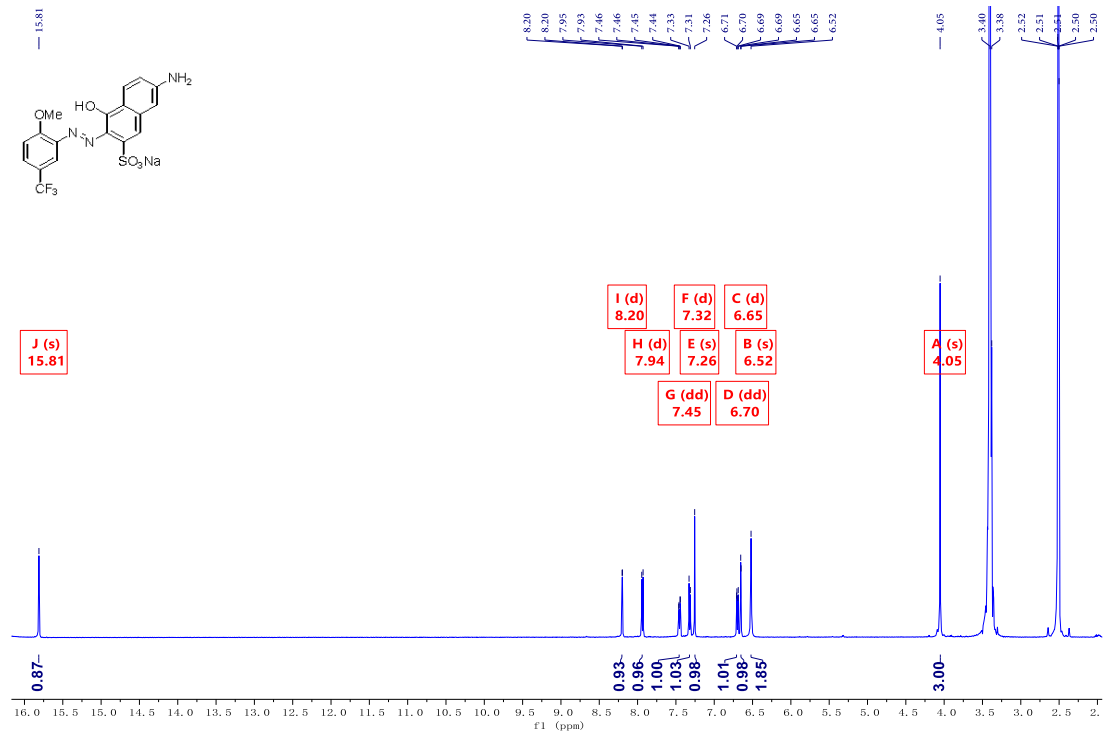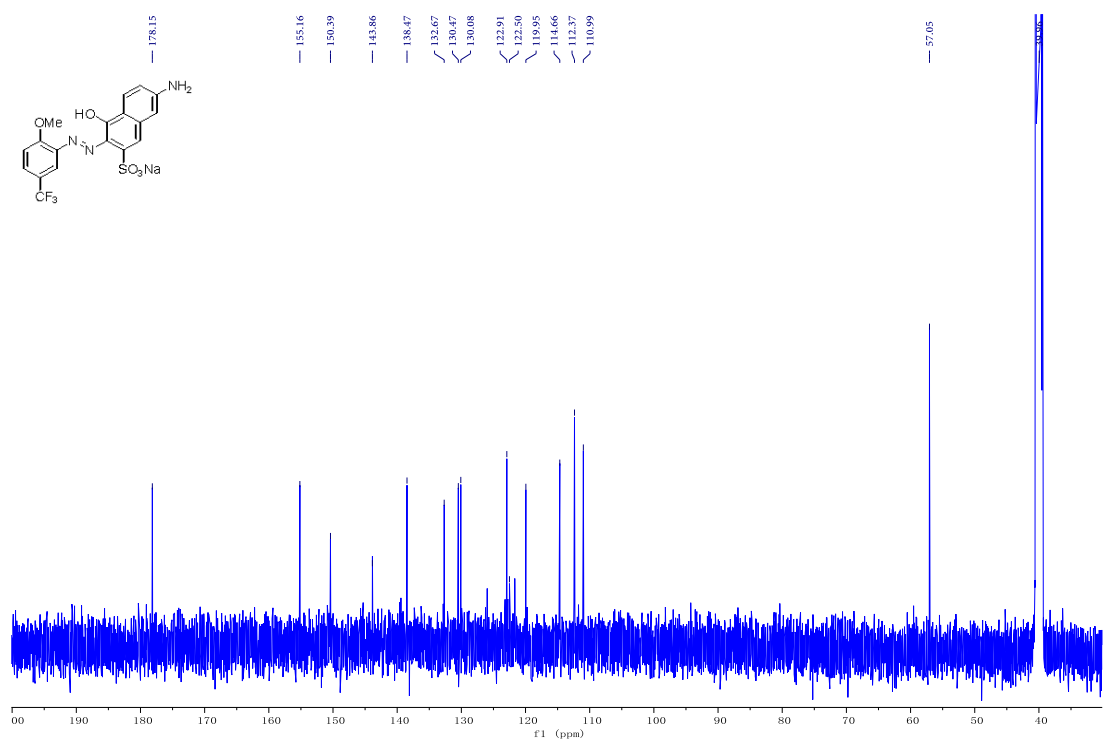

# Sodium 6-amino-4-hydroxy-3-((2-methoxy-5-(trifluoromethyl)phenyl)diazenyl)naphthalene-2-sulfonate (5b)

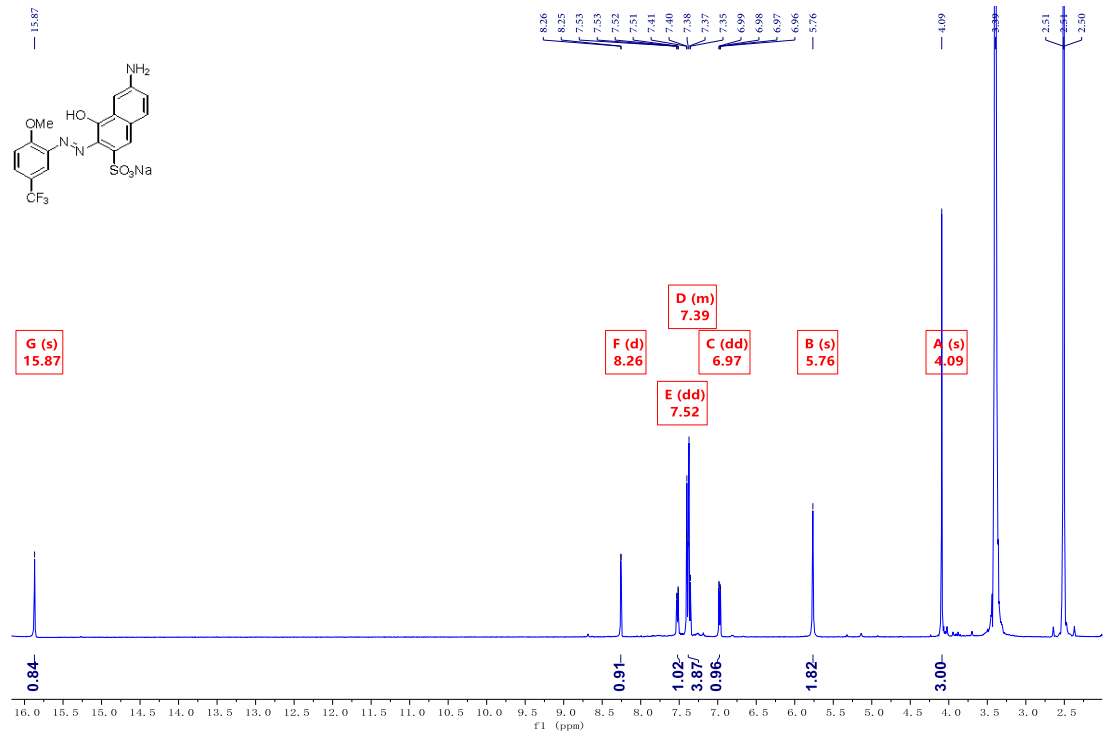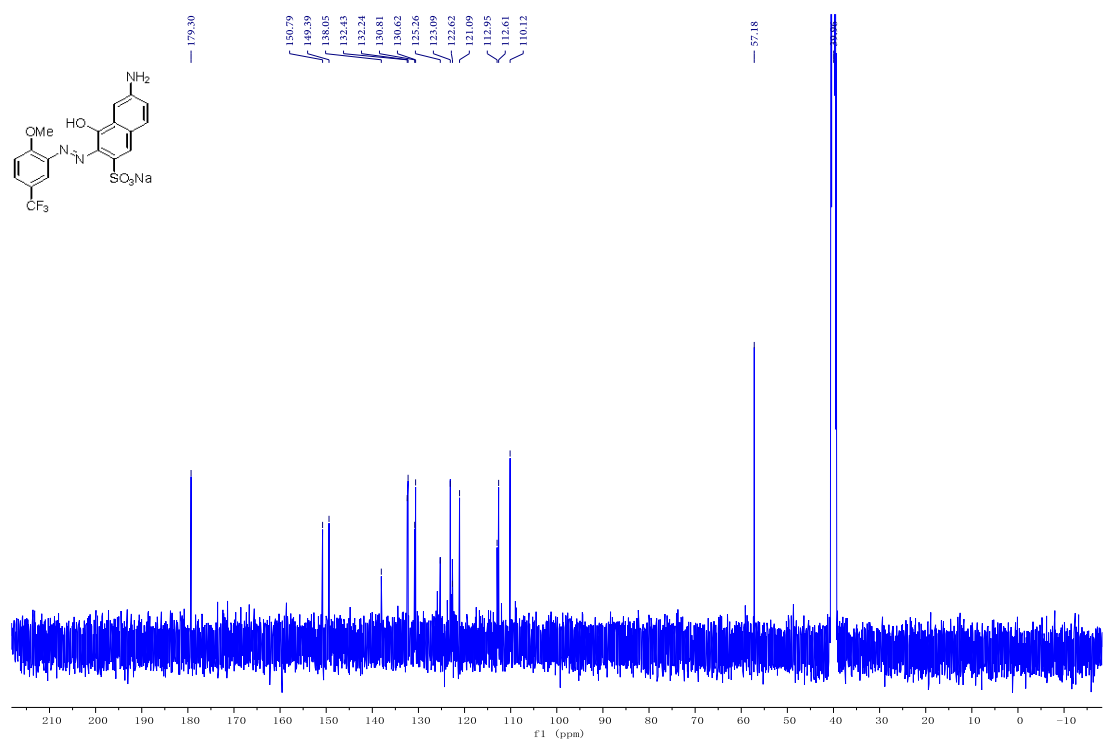

Sodium 7-amino-4-hydroxy-3-((2-methoxy-5-(trifluoromethyl)phenyl)diazenyl)-8-sulfonaphthalene-2-sulfonate (5c)

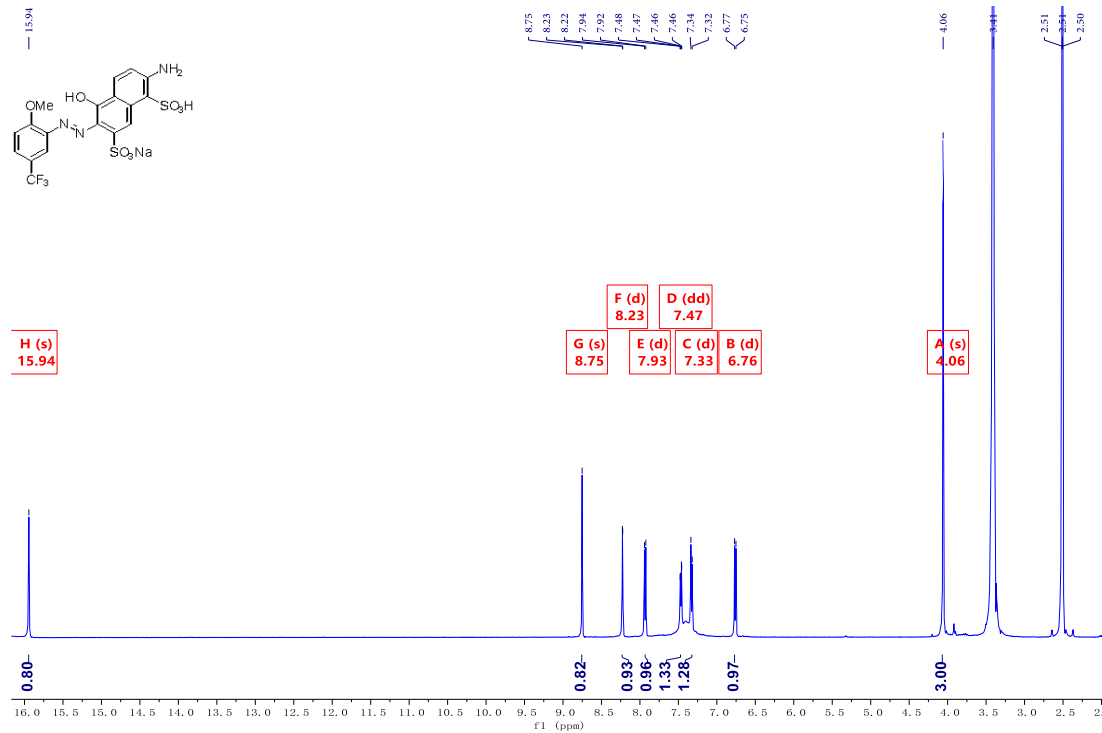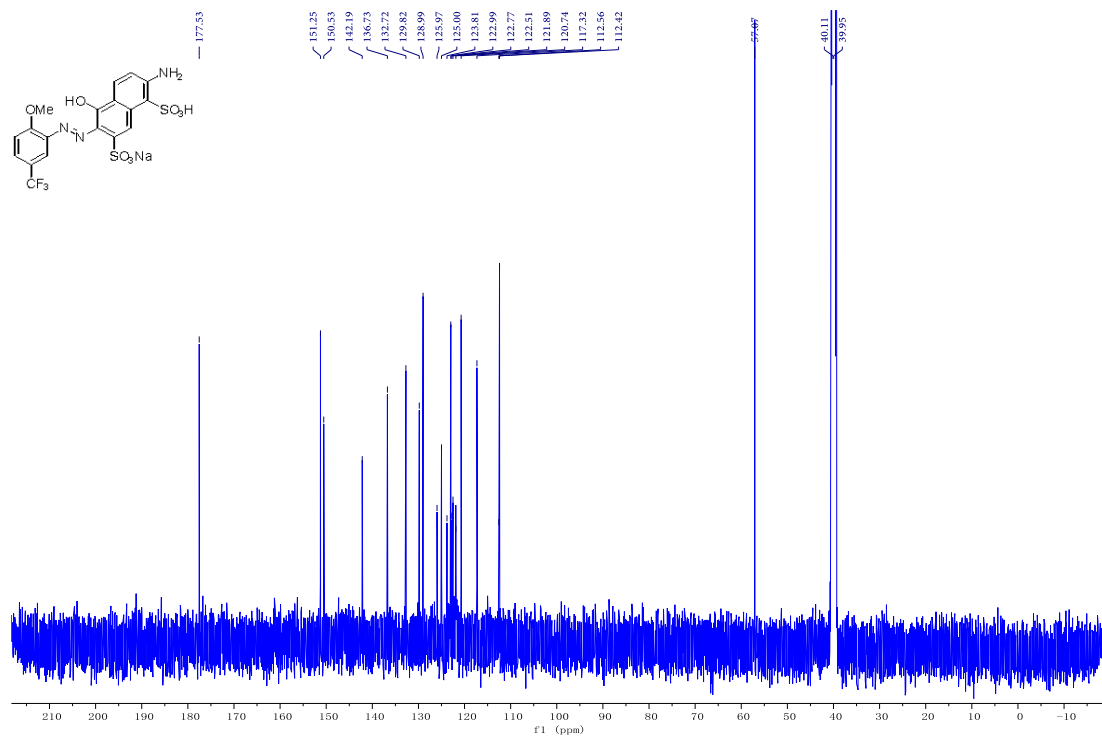

# Sodium 7-amino-3-((5-carboxy-2-methoxyphenyl)diazenyl)-4-hydroxynaphthalene-2-sulfonate (6a)

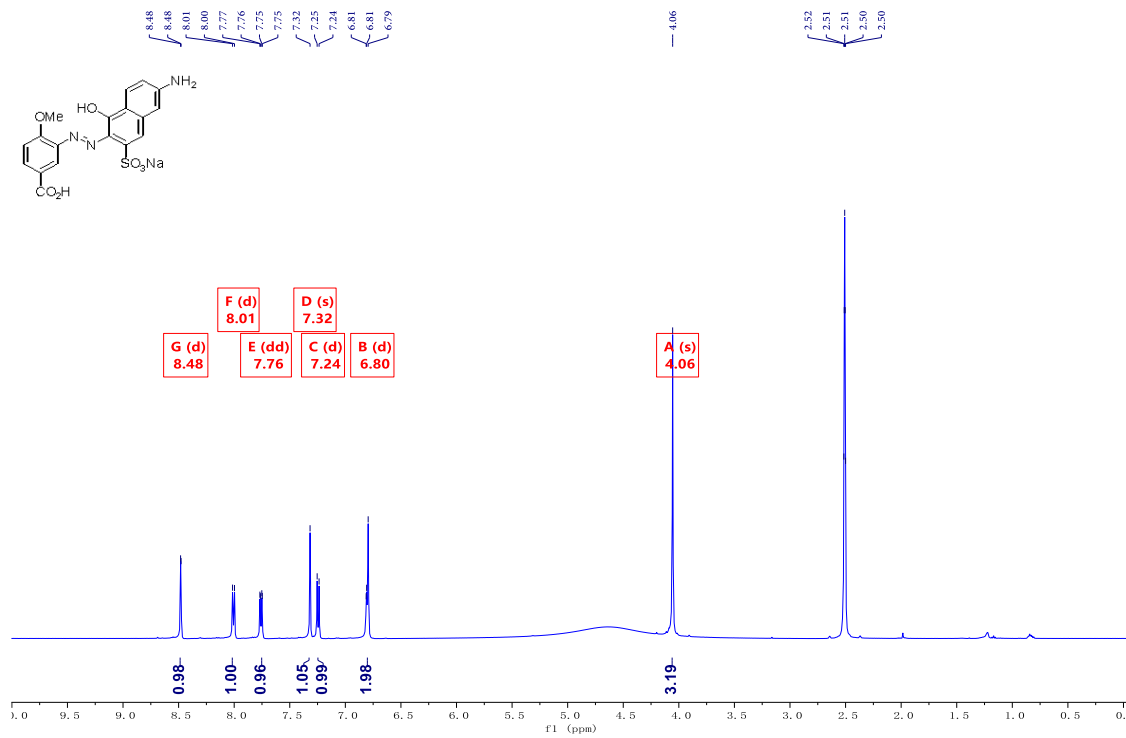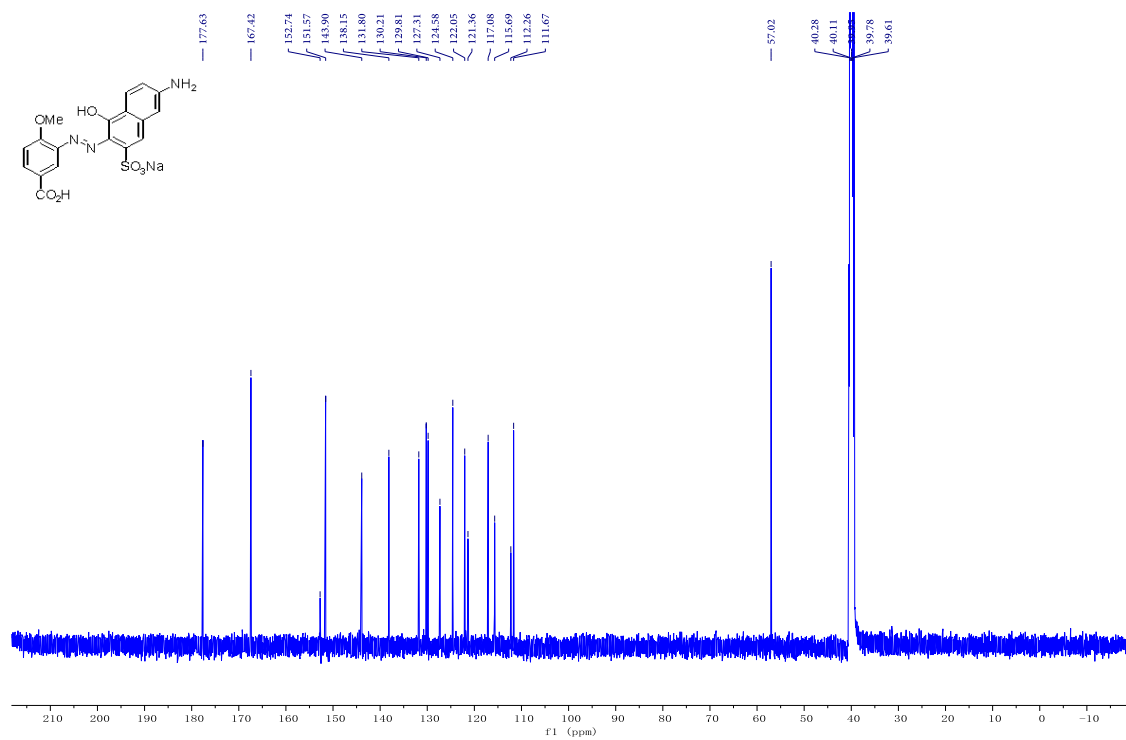

# Sodium 7-amino-3-((5-chloro-2-methoxyphenyl)diazenyl)-4-hydroxynaphthalene-2-sulfonate (7a)

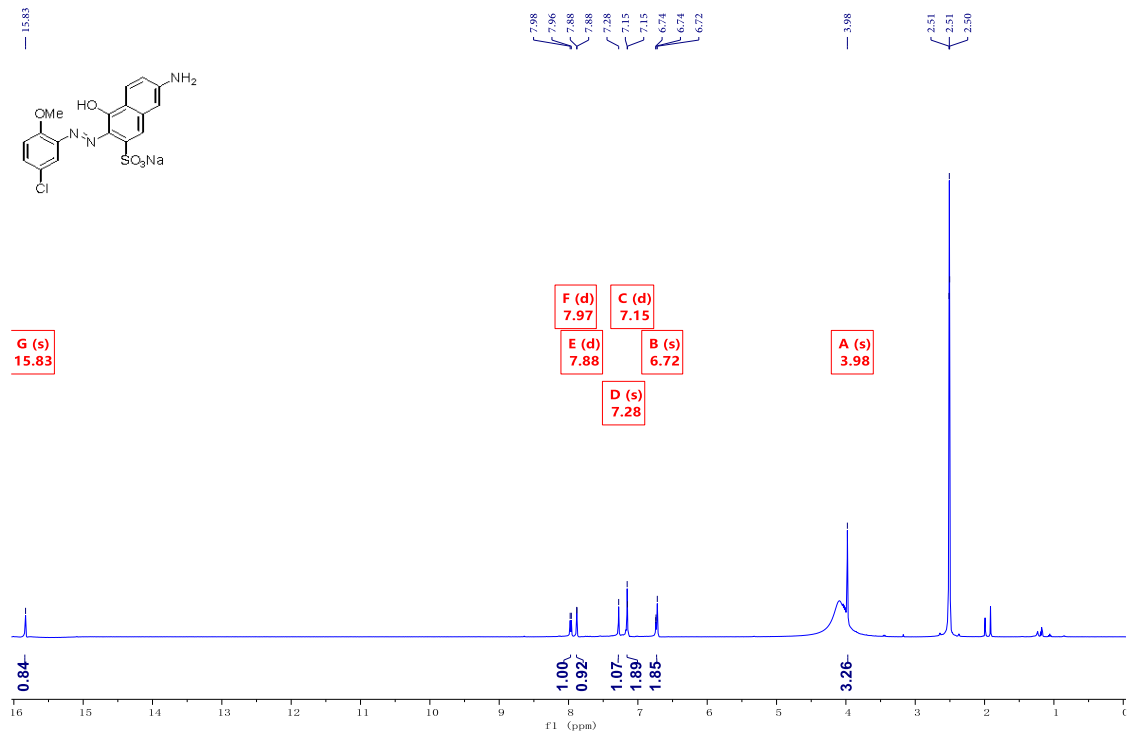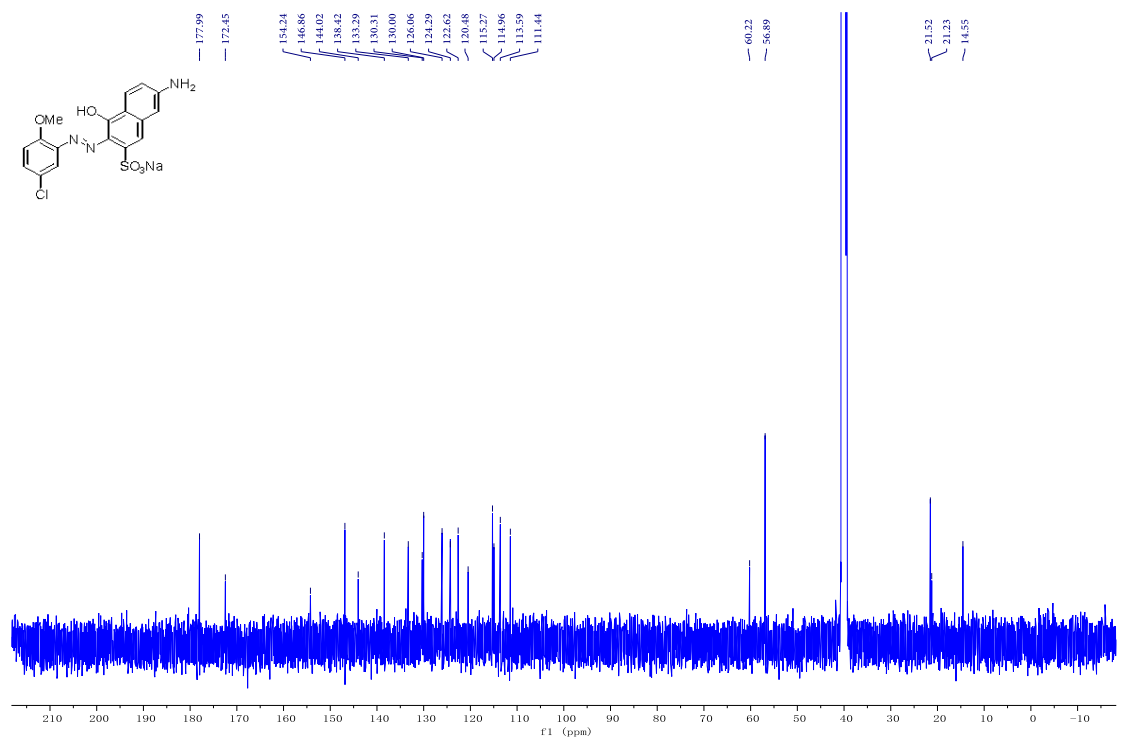



# Sodium 7-amino-3-((3-chlorophenyl)diazenyl)-4-hydroxynaphthalene-2-sulfonate (8a)

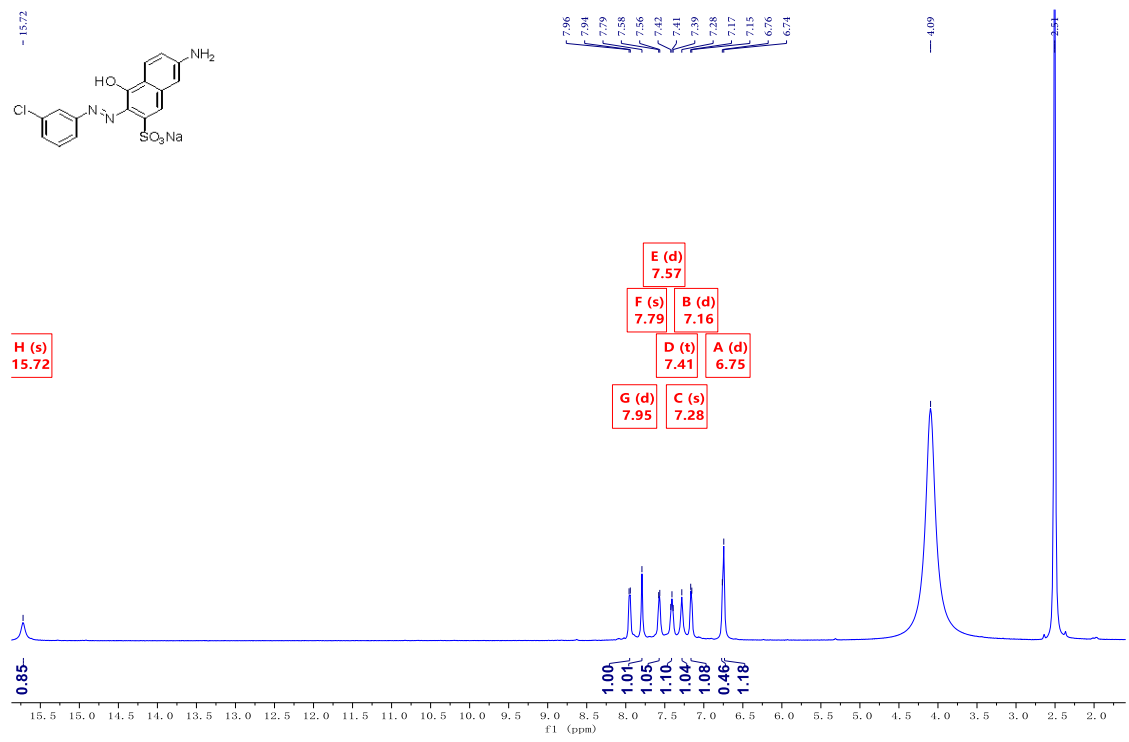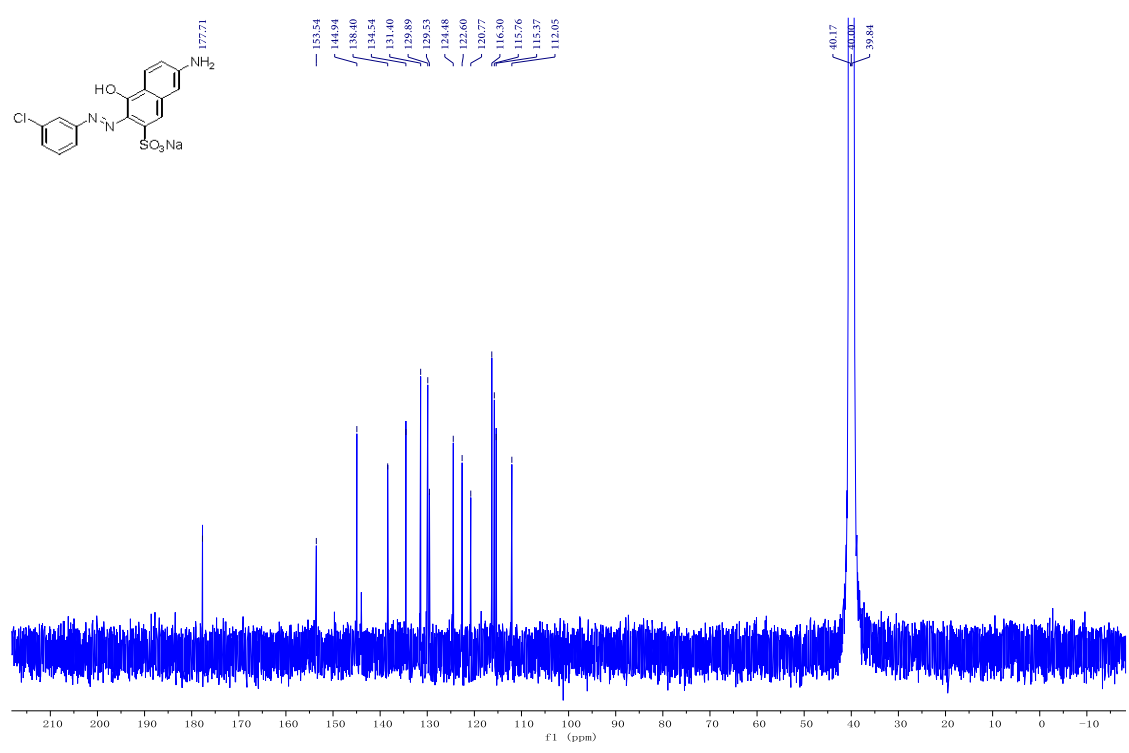

# Sodium 7-amino-4-hydroxy-3-(p-tolyldiazenyl)naphthalene-2-sulfonate (9a)

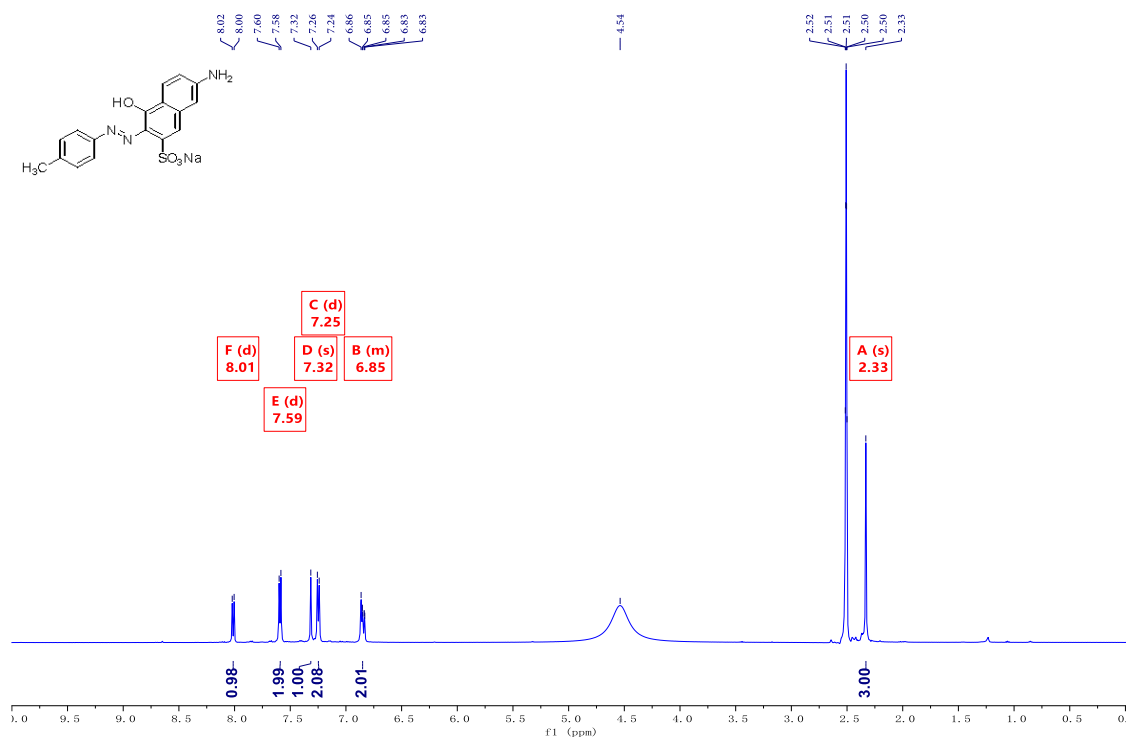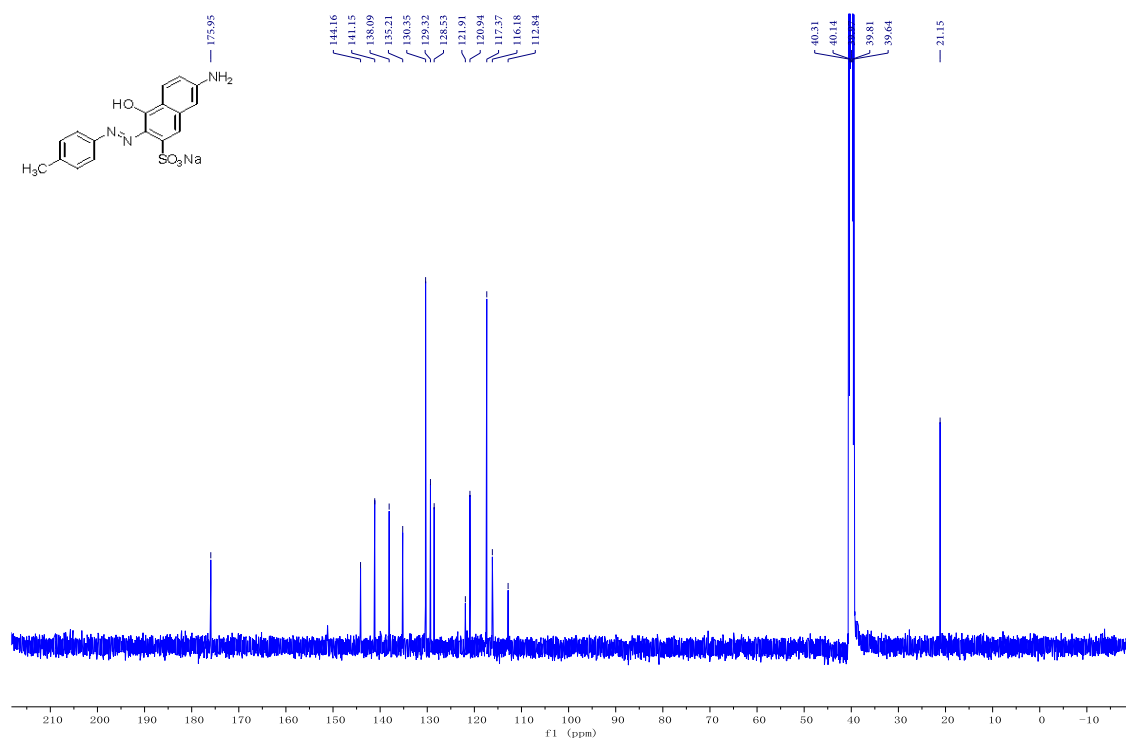

Supplement: d3ra05518c1.pdf [file d3ra05518c1.pdf]
